# Supplementary material
Source: PubMed Central journal article supplement (PMC3146572)

# Regiodivergent Reactions through Catalytic Enantioselective Silylation of Chiral Diols. Synthesis of Sapinofuranone A

Jason M. Rodrigo, Yu Zhao, Amir H. Hoveyda,\* and Marc L. Snapper\*

Department of Chemistry, Merkert Chemistry Center, Boston College  
Chestnut Hill, Massachusetts 02467

## Supporting Information

| <b><i>Table of Contents</i></b>                                                                                                                              | <b><i>page</i></b> |
|--------------------------------------------------------------------------------------------------------------------------------------------------------------|--------------------|
| <i>General information</i> .....                                                                                                                             | S2                 |
| <i>Reagents and catalyst</i> .....                                                                                                                           | S2                 |
| <i>General procedures</i> .....                                                                                                                              | S2-S3              |
| <i>Characterization Data</i> .....                                                                                                                           | S3-S11             |
| <i>(1S,2R)-2-(tert-butyldimethylsilyloxy)cyclohex-3-enol (isomer A, Table 1, entry 1, (+)-4)</i> .....                                                       | S3                 |
| <i>(1S,6R)-6-(tert-butyldimethylsilyloxy)cyclohex-2-enol (isomer B, Table 1, entry 1, (-)-5)</i> .....                                                       | S3                 |
| <i>(1S,2R)-2-(tert-butyldimethylsilyloxy)cyclopent-3-enol (isomer A, Table 1, entry 2)</i> .....                                                             | S4                 |
| <i>(1S,5R)-5-(tert-butyldimethylsilyloxy)cyclopent-2-enol (isomer B, Table 1, entry 2)</i> .....                                                             | S4                 |
| <i>(1S,2R)-2-(tert-butyldimethylsilyloxy)cyclohept-3-enol (isomer A, Table 1, entry 3)</i> .....                                                             | S5                 |
| <i>(1S,7R)-7-(tert-butyldimethylsilyloxy)cyclohept-2-enol (isomer B, Table 1, entry 3)</i> .....                                                             | S6                 |
| <i>(3R, 4S)-3-(triethylsilyloxy)heptan-4-ol (isomer A, Table 1, entry 4) and (3S, 4R)-4-(triethylsilyloxy)heptan-3-ol (isomer B, Table 1, entry 4)</i> ..... | S6                 |
| <i>(1S,2R)-2-(tert-butyldimethylsilyloxy)-4-methylcyclohex-4-ene-1-ol (isomer A, Table 1, entry 5)</i> ...                                                   | S7                 |
| <i>(1R,2S)-1-(tert-butyldimethylsilyloxy)-4-methylcyclohex-4-ene-2-ol (isomer B, Table 1, entry 5)</i> ...                                                   | S7                 |
| <i>(2R,3S)-6-(benzyloxy)-2-(tert-butyldimethylsilyloxy)hex-4-yn-3-ol (isomer A, Table 1, entry 6)</i> .....                                                  | S8                 |
| <i>(2S,3R)-6-(benzyloxy)-3-(tert-butyldimethylsilyloxy)hex-4-yn-2-ol (isomer B, Table 1, entry 6)</i> .....                                                  | S9                 |
| <i>(R)-6-(tert-butyldimethylsilyloxy)cyclohex-2-enone (7)</i> .....                                                                                          | S9                 |
| <i>(R)-4-(tert-butyldimethylsilyloxy)-3-methylcyclohex-2-enone (8)</i> .....                                                                                 | S9-S10             |
| <i>Enantioselective total synthesis of (-)-sapinofuranone A</i> .....                                                                                        | S10-S11            |
| <i>(S)-2-(tert-butyldimethylsilyloxy)-2-((S)-5-oxotetrahydrofuran-2-yl)acetaldehyde (6)</i> .....                                                            | S10                |
| <i>(S)-5-((R,2Z,4E)-1-(tert-butyldimethylsilyloxy)hexa-2,4-dienyl)dihydrofuran-2(3H)-one (TBS-Sap-<br/>inofuranone A, Scheme 3)</i> .....                    | S10                |
| <i>(-)-Sapinofuranone A (Scheme 3)</i> .....                                                                                                                 | S11                |
| <i><sup>1</sup>H NMR and <sup>13</sup>C NMR Spectra</i> .....                                                                                                | S12-S43            |

## General information

Infrared (**IR**) spectra  $\nu_{\max}$  are reported in  $\text{cm}^{-1}$ ; bands are characterized as broad (br), strong (s), medium (m), and weak (w).  $^1\text{H}$  NMR spectra chemical shifts are reported in ppm with the solvent reference as the internal standard ( $\text{CHCl}_3$ :  $\delta$  7.26). Data are reported as follows: chemical shift, integration, multiplicity (s = singlet, d = doublet, t = triplet, q = quartet, m = multiplet, br = broad), and coupling constants (Hz).  $^{13}\text{C}$  NMR spectra chemical shifts are reported in ppm with the solvent reference as the internal standard ( $\text{CHCl}_3$ :  $\delta$  77.23). Melting points (**mp**) were uncorrected. **Enantiomeric ratios** were determined by gas liquid chromatography (GLC).<sup>1</sup>

## Reagents and catalyst

Racemic diols (Substrates in Table 1) were prepared according to literature procedure.<sup>2</sup> Catalyst **1** was prepared according to the literature procedure<sup>3</sup> and is also commercially available. Chlorotriethylsilane (TESCl) was distilled from 3 Å molecular sieves prior to use. Citric Acid, *tert*-butyldimethylsilyl chloride (TBSCl), diisopropylethylamine (DIPEA), and imidazole were used as received. Tetrahydrofuran (THF) was dried on alumina columns by a solvent dispensing system prior to use.

## General procedure for the regiodivergent reaction on a racemic mixture of 1,2-*syn* diols through catalytic enantioselective silylation with TBSCl

Catalyst **1** (19 mg, 0.06 mmol) and the diol substrate (0.2 mmol) were weighed into a 10 x 75 mm test tube. THF (48  $\mu\text{L}$ ) and DIPEA (52  $\mu\text{L}$ , 0.3 mmol) were added with a mechanical pipettor. The tube was capped with a septum, and the mixture was allowed to cool to  $-78$  °C. TBSCl (45 mg, 0.3 mmol) was dissolved in THF (55  $\mu\text{L}$ , total volume  $\sim 100$   $\mu\text{L}$ ) and added to the test tube with a Gilson Pipetman. The test tube was capped with a septum, wrapped with Teflon tape and the mixture was allowed to stir at the appropriate temperature (see below for details) in a cryocool apparatus for the reported period of time. The reaction was quenched by addition of DIPEA (25  $\mu\text{L}$ ) and MeOH (25  $\mu\text{L}$ ). The mixture was allowed to warm to room temperature, diluted with EtOAc (20 mL) and washed with 10% citric acid (10 mL). The aqueous layer was washed with EtOAc (2 x 15 mL) and the combined organic layer was dried over  $\text{MgSO}_4$ , filtered and concentrated to afford a yellow oil. The reaction mixture was purified by silica gel chromatography (10%  $\text{Et}_2\text{O}$  in hexanes to 1:1  $\text{Et}_2\text{O}$ :hexanes) and analyzed by GLC (Supelco Beta, or Gamma Dex 120).

The aqueous layer was basified with  $\text{NaOH}_{(\text{aq})}$  (3 N) until pH 12 and washed with  $\text{CH}_2\text{Cl}_2$  (3 x 15 mL). The combined organic layer was dried over  $\text{MgSO}_4$ , filtered and concentrated under high vacuum to provide the recovered catalyst **1** as a white solid (mass recovery > 90%). The recovered catalyst was used directly for subsequent silylation reactions with the same efficiency and selectivity.

---

<sup>1</sup> Due to resolution issues during photocopying/scanning, some of the GLC spectra were digitally darkened to improve readability.

<sup>2</sup> B. Jung, S. Kang, *Proc. Nat. Acad. Sci.* **2007**, *104*, 1473–1475.

<sup>3</sup> Y. Zhao, J. Rodrigo, A. H. Hoveyda, M. L. Snapper, *Nature* **2006**, *443*, 67–70.

### General procedure for the regiodivergent reaction on a racemic mixture of 1,2-*syn* diols through catalytic enantioselective silylation with TESCI

Catalyst **1** (12 mg, 0.04 mmol) and the diol substrate (0.2 mmol) were weighed into a 10 x 75 mm test tube. THF (148  $\mu$ L) and DIPEA (52  $\mu$ L, 0.3 mmol) were added with a mechanical pipettor. The tube was capped with a septum, and the mixture was allowed to cool to -78  $^{\circ}$ C. TESCI (42  $\mu$ L, 0.25 mmol) was dissolved in THF (158  $\mu$ L, total volume  $\sim$ 200  $\mu$ L) and added to the test tube with a mechanical pipettor. The test tube was capped with a septum, wrapped with Teflon tape and the mixture was allowed to stir at -78  $^{\circ}$ C in a cryocool apparatus for 48 h. The reaction was quenched by addition of DIPEA (25  $\mu$ L) and MeOH (25  $\mu$ L). The mixture was allowed to warm to room temperature, diluted with EtOAc (20 mL) and washed with 10% citric acid (10 mL). The aqueous layer was washed with EtOAc (2 x 15 mL) and the combined organic layer was dried over MgSO<sub>4</sub>, filtered and concentrated to afford a yellow oil. The crude product was purified by silica gel chromatography (10% diethyl ether in hexanes to 1:1 Et<sub>2</sub>O:hexanes) and analyzed by GLC (Supelco Beta, or Gamma Dex 120).

### Characterization Data

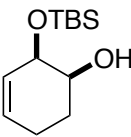 **(1S, 2R)-2-(tert-butyldimethylsilyloxy)cyclohex-3-enol (Table 1, entry 1, regioisomer A, (+)-4):** IR (neat, thin film): 3570 (br), 3031 (br), 2955 (s), 2928 (s), 2858 (s), 1729 (s), 1462 (w), 1078 (s), 837 (s), 778 (m) cm<sup>-1</sup>. <sup>1</sup>H NMR (CDCl<sub>3</sub>, 400 MHz):  $\delta$  5.81 (1H, dtd, *J* = 10.0, 3.8, 1.2 Hz), 5.53 (1H, dtd, *J* = 10.0, 3.4, 2.0 Hz), 4.18 (1H, m), 3.77 (1H, m), 2.56 (1H, d, *J* = 5.6 Hz), 2.26-2.17 (1H, m), 2.01-1.83 (2H, m), 1.67 (1H, dtd, *J* = 12.8, 6.4, 2.8 Hz), 0.910 (9H, s), 0.114 (3H, s), 0.109 (3H, s). <sup>13</sup>C NMR (CDCl<sub>3</sub>, 100 MHz):  $\delta$  130.5, 127.5, 77.6, 76.9, 68.5, 68.2, 26.5, 26.1, 25.9, 22.8, -3.9, -4.4. HRMS [M+H]<sup>+</sup>: Calculated for C<sub>12</sub>H<sub>25</sub>O<sub>2</sub>Si: 229.1624; Found: 229.1628. **Optical Rotation:** [ $\alpha$ ]<sub>D</sub><sup>25</sup> +21 (*c* = 1.0, CHCl<sub>3</sub>).

Enantiomeric purity was established by GLC analysis (Supelco Beta Dex 120 (30 m x 0.15 mm x 0.25  $\mu$ m film thickness), 140  $^{\circ}$ C hold 110 min, 15 psi.); chromatograms are illustrated below for a 97% ee sample:

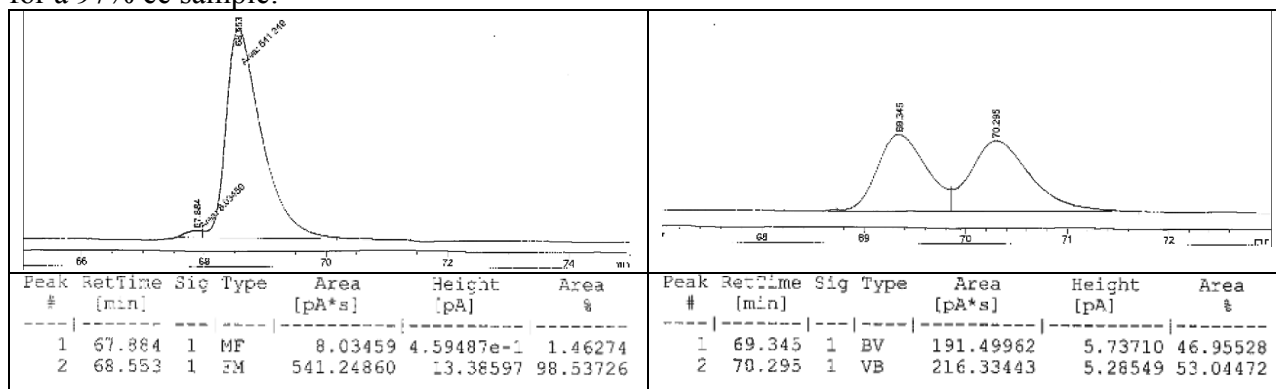

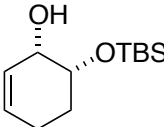 **(1S, 6R)-6-(tert-butyldimethylsilyloxy)cyclohex-2-enol (Table 1, entry 1, regioisomer B, (-)-5):** IR (neat, thin film): 3561 (br), 3029 (br), 2952 (s), 2929 (s), 2857 (s), 1471 (w), 1096 (s), 837 (s), 776 (m) cm<sup>-1</sup>. <sup>1</sup>H NMR (CDCl<sub>3</sub>, 400 MHz):  $\delta$  5.85 (1H, m), 5.73 (1H, dtd, *J* = 9.6, 4.0, 2.0 Hz), 4.01 (1H, m), 3.86 (1H, dt, *J* = 10.4, 3.2 Hz), 2.63 (1H, d, *J* = 4.0 Hz), 2.25-2.14 (1H, m), 2.06-1.95 (1H, m), 1.88-1.78 (1H, m), 1.62-1.55 (1H, m), 0.911 (9H, s), 0.106 (3H, s), 0.096 (3H, s). <sup>13</sup>C NMR (CDCl<sub>3</sub>, 100 MHz):

$\delta$  131.0, 127.2, 77.5, 76.9, 70.5, 66.8, 26.4, 26.1, 24.1, 18.4, -4.2, -4.6. **HRMS** [M-OH]<sup>+</sup>: Calculated for C<sub>12</sub>H<sub>23</sub>OSi: 211.1518; Found: 211.1516. **Optical Rotation**: [ $\alpha$ ]<sub>D</sub><sup>20</sup> -92 (*c* = 3.8, CHCl<sub>3</sub>).

Enantiomeric purity was established by GLC analysis (Supelco Beta Dex 120 (30 m x 0.15 mm x 0.25  $\mu$ m film thickness), 140 °C hold 110 min, 15 psi.); chromatograms are illustrated below for an 80% ee sample:

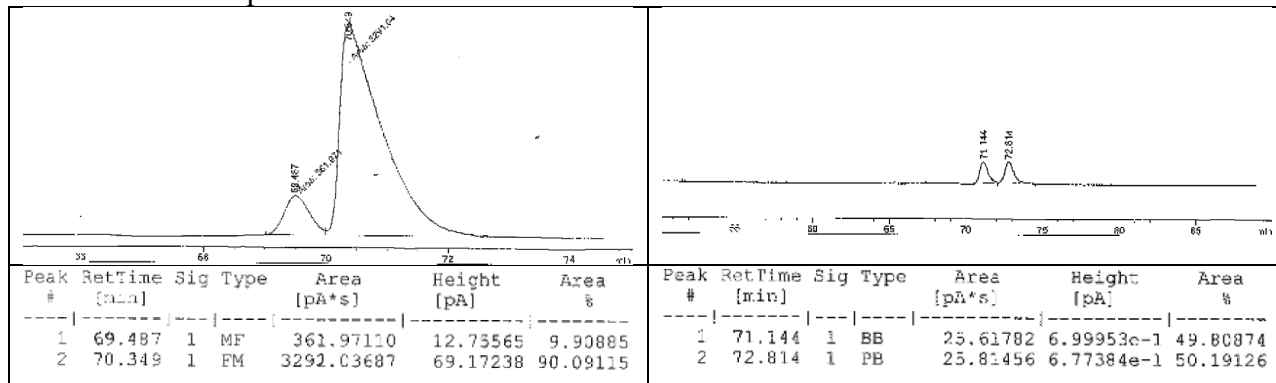

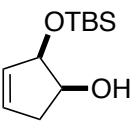 **(1S, 2R)-2-(tert-butyldimethylsilyloxy)cyclopent-3-enol (Table 1, entry 2, regioisomer A):** IR (neat, thin film): 3538 (br), 3062 (m), 2953 (m), 2929 (m), 2888 (m), 2857 (m), 1082 (m), 923 (m), 836 (s), 778 (s) cm<sup>-1</sup>. <sup>1</sup>H NMR (CDCl<sub>3</sub>, 400 MHz):  $\delta$  5.86 (1H, m), 5.82 (1H, dq, *J* = 6.0, 2.0 Hz), 4.32 (1H, t, *J* = 5.2 Hz), 4.34 (1H, td, *J* = 6.4, 3.6 Hz), 2.95 (1H, d, *J* = 5.6 Hz), 2.51 (1H, ddt, *J* = 16.8, 5.6, 2.0 Hz), 2.30 (1H, ddq, *J* = 16.4, 3.6, 2.0 Hz), 0.91 (9H, s), 0.12 (3H, s), 0.11 (3H, s). <sup>13</sup>C NMR (CDCl<sub>3</sub>, 100 MHz):  $\delta$  132.6, 132.1, 77.5, 76.9, 75.4, 72.1, 40.1, 26.1, 18.4, -4.4, -4.7. **HRMS** [M-OH]<sup>+</sup>: Calculated for C<sub>11</sub>H<sub>21</sub>OSi: 197.1361; Found: 197.1370. **Optical Rotation**: [ $\alpha$ ]<sub>D</sub><sup>20</sup> +14 (*c* = 2.5, CHCl<sub>3</sub>).

Enantiomeric purity was established by GLC analysis (Supelco Beta Dex 120 (30 m x 0.15 mm x 0.25  $\mu$ m film thickness), 80 °C isothermal, 15 psi.); chromatograms are illustrated below for a 76% ee sample:

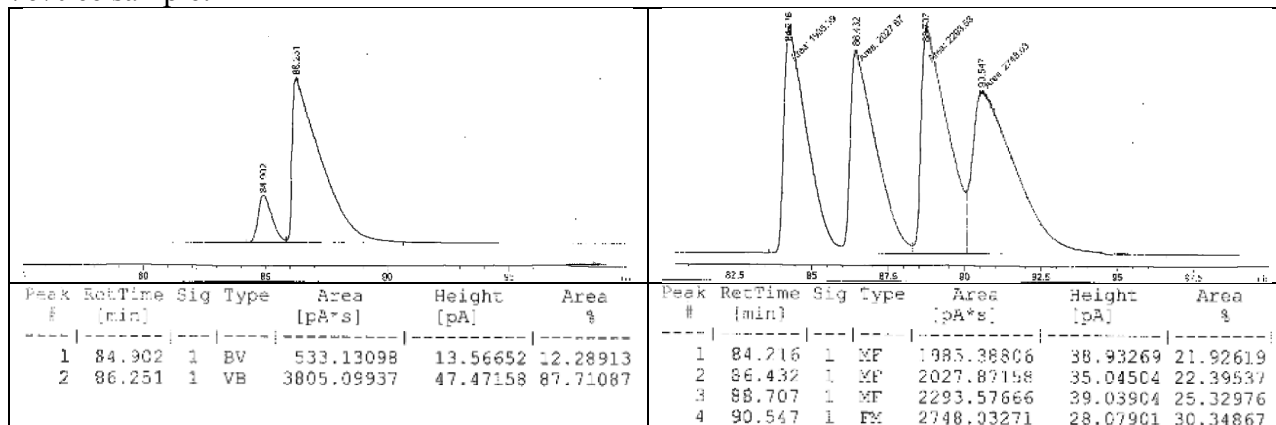

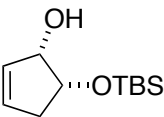 **(1S, 5R)-5-(tert-butyldimethylsilyloxy)cyclopent-2-enol (Table 1, entry 2, regioisomer B):** IR (neat, thin film): 3529 (br), 3061 (br), 2953 (m), 2929 (m), 2899 (m), 2857 (m), 1078 (s), 938 (m), 835 (s), 776 (s) cm<sup>-1</sup>. <sup>1</sup>H NMR (CDCl<sub>3</sub>, 400 MHz):  $\delta$  5.87 (1H, dqd, *J* = 4.4, 2.0, 1.2 Hz), 5.65 (1H, dq, *J* = 6.0, 2.0 Hz), 4.63 (1H, m), 4.20 (1H, qd, *J* = 5.6, 2.8 Hz), 3.03 (1H, d, *J* = 4.8 Hz), 2.49 (1H, dddd, *J* = 17.2, 6.0, 2.4,

0.8 Hz), 2.34 (1H, m), 0.91 (9H, s), 0.12 (3H, s), 0.11 (3H, s).  $^{13}\text{C}$  NMR ( $\text{CDCl}_3$ , 100 MHz):  $\delta$  132.7, 131.4, 77.5, 77.0, 76.9, 70.7, 39.9, 26.1, 18.4, -4.2, -4.6. HRMS  $[\text{M}+\text{H}]^+$ : Calculated for  $\text{C}_{11}\text{H}_{23}\text{O}_2\text{Si}$ : 215.1467; Found: 215.1459. **Optical Rotation**:  $[\alpha]_D^{20}$  -230 ( $c = 3.8$ ,  $\text{CHCl}_3$ ).

Enantiomeric purity was established by GLC analysis (Supelco Beta Dex 120 (30 m x 0.15 mm x 0.25  $\mu\text{m}$  film thickness), 80 °C isothermal, 15 psi); chromatograms are illustrated below for a 92% ee sample:

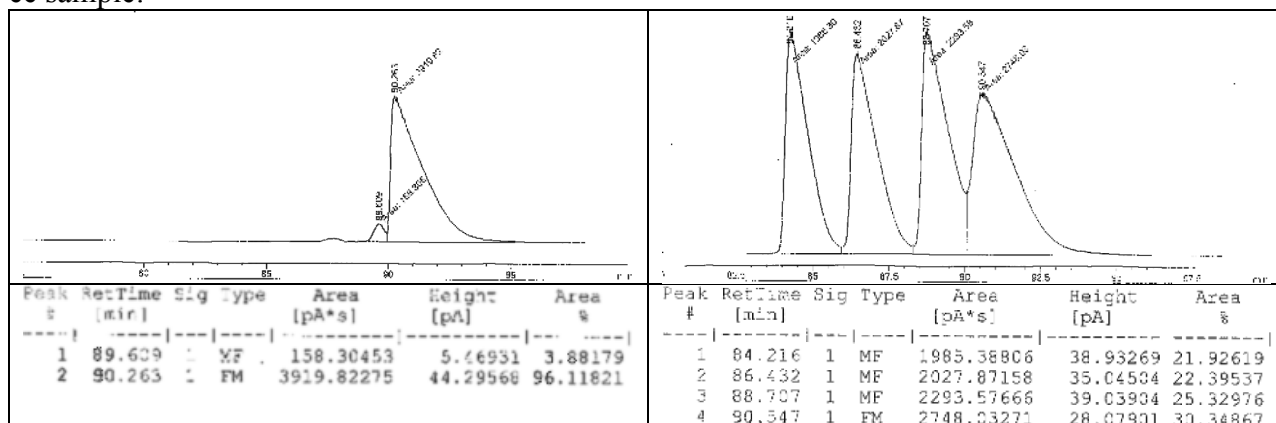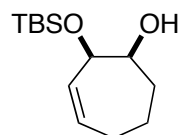

**(1S,2R)-2-(tert-butyldimethylsilyloxy)cyclohept-3-enol (Table 1, entry 3, regioisomer A)**: IR (neat, thin film): 3467 (br), 3021 (m), 2928 (m), 2885 (m), 2856 (m), 1251 (m), 835 (s), 775 (s)  $\text{cm}^{-1}$ .  $^1\text{H}$  NMR ( $\text{CDCl}_3$ , 400 MHz):  $\delta$  5.85 (1H, dddd,  $J = 11.6, 7.2, 5.6, 2.0$  Hz), 5.50 (1H, ddt,  $J = 11.6, 4.0, 1.6$  Hz), 4.42 (1H, dq,  $J = 3.2, 1.6$  Hz), 3.80 (1H, m), 2.22 (1H, dtd,  $J = 15.6, 7.6, 2.4$  Hz), 2.13 (1H, d,  $J = 5.2$  Hz), 2.11-1.94 (2H, m), 1.79-1.60 (2H, m), 1.47 (1H, m), 0.904 (9H, s), 0.076 (3H, s), 0.073 (3H, s).  $^{13}\text{C}$  NMR ( $\text{CDCl}_3$ , 100 MHz):  $\delta$  132.9, 132.3, 77.5, 76.9, 74.9, 73.0, 34.0, 28.9, 26.1, 21.5, 18.4, -4.3, -4.6. HRMS  $[\text{M}-\text{OH}]^+$ : Calculated for  $\text{C}_{13}\text{H}_{25}\text{OSi}$ : 225.1675; Found: 225.1680. **Optical Rotation**:  $[\alpha]_D^{20}$  -110 ( $c = 1.0$ ,  $\text{CHCl}_3$ ).

Enantiomeric purity was established by GLC analysis (Supelco Beta Dex 120 (30 m x 0.15 mm x 0.25  $\mu\text{m}$  film thickness), 130 °C hold 60 min, 15 psi.); chromatograms are illustrated below for a 69% ee sample:

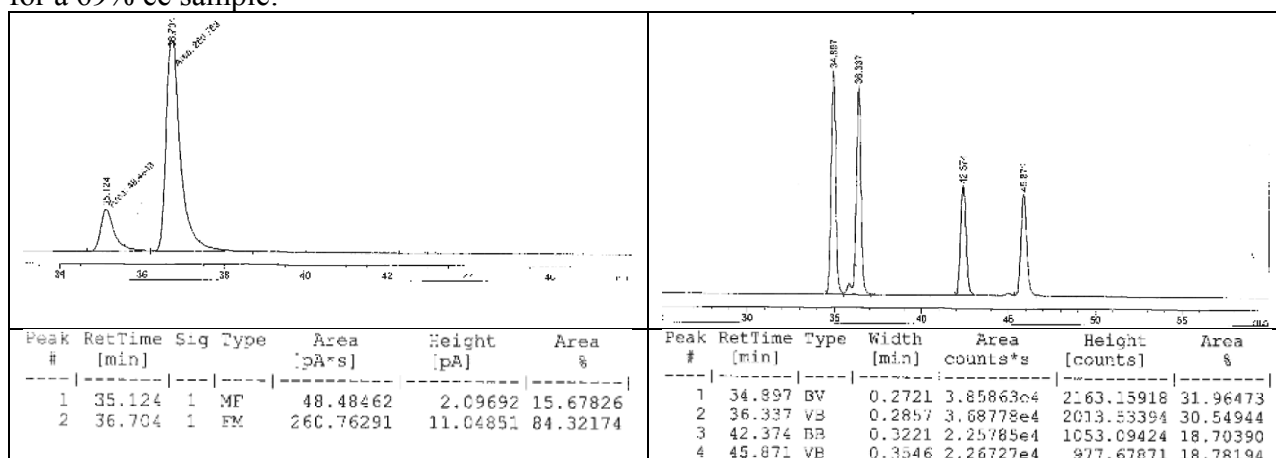

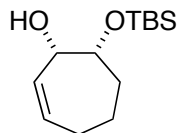

**(1S,7R)-7-(tert-butyldimethylsilyloxy)cyclohept-2-enol (Table 1, entry 3, regioisomer B):** IR (neat, thin film): 3446 (br), 3026 (br), 2951 (m), 2929 (m), 2885 (m), 2856 (m), 1251 (m), 836 (s), 775 (s)  $\text{cm}^{-1}$ .  $^1\text{H NMR}$  ( $\text{CDCl}_3$ , 400 MHz):  $\delta$  5.86 (1H, dtd,  $J = 12.4, 6.4, 1.6$  Hz), 5.55 (1H, dd,  $J = 11.6, 5.2$  Hz), 4.25 (1H, m), 3.89 (1H, dt,  $J = 8.4, 2.4$  Hz), 2.3-1.96 (4H, m), 1.75-1.65 (2H, m), 1.5-1.3 (1H, m), 0.895 (9H, s), 0.076 (3H, s), 0.070 (3H, s).  $^{13}\text{C NMR}$  ( $\text{CDCl}_3$ , 100 MHz):  $\delta$  133.2, 131.0, 77.6, 76.9, 74.2, 73.9, 34.4, 28.8, 26.1, 22.5, 18.4, -4.2, -4.6. **HRMS**  $[\text{M}-\text{OH}]^+$ : Calculated for  $\text{C}_{13}\text{H}_{25}\text{OSi}$ : 225.1675; Found: 225.1665. **Optical Rotation**:  $[\alpha]_D^{20} +18$  ( $c = 1.0, \text{CHCl}_3$ ).

Enantiomeric purity was established by GLC analysis (Supelco Beta Dex 120 (30 m x 0.15 mm x 0.25  $\mu\text{m}$  film thickness), 130  $^\circ\text{C}$  hold 60 min, 15 psi.); chromatograms are illustrated below for a 97% ee sample:

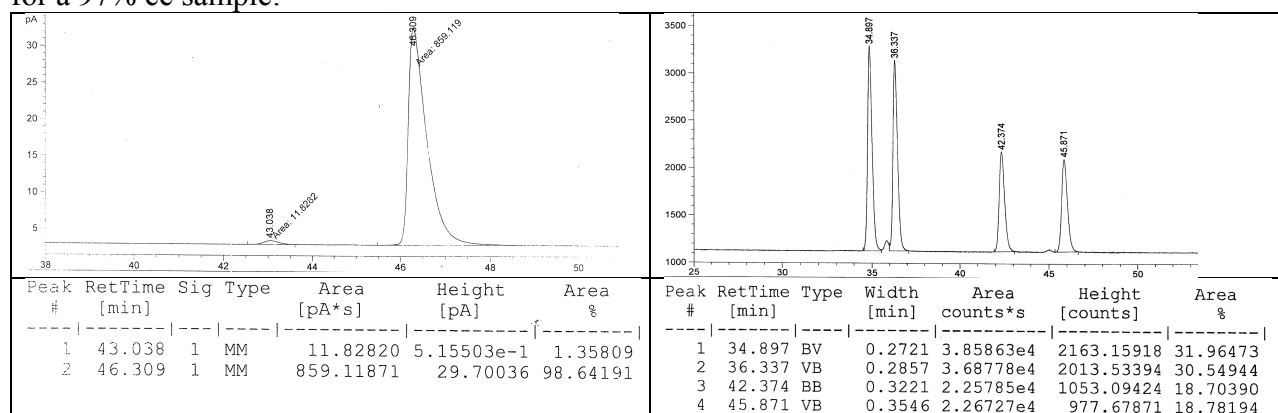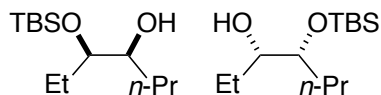

**(3R,4S)-3-(triethylsilyloxy)heptan-4-ol (Table 1, entry 4, regioisomer A) and (3S,4R)-4-(triethylsilyloxy)heptan-3-ol (Table 1, entry 4, regioisomer B)** the enantiomeric purity was established on the direct products resulting from the enantioselective catalytic silylation. The chromatograms are illustrated below for 95% ee samples:

Enantiomeric purity was established by GLC analysis (Supelco Beta Dex 120 (30 m x 0.15 mm x 0.25  $\mu\text{m}$  film thickness), 130  $^\circ\text{C}$  hold 60 min, 15 psi.); chromatograms are illustrated below for a 91% ee sample (Note: Because only one of the regioisomeric products can be resolved by GLC, Horeau's equation is applied to the system in order to derive the enantiopurity for the unresolved regioproduct).

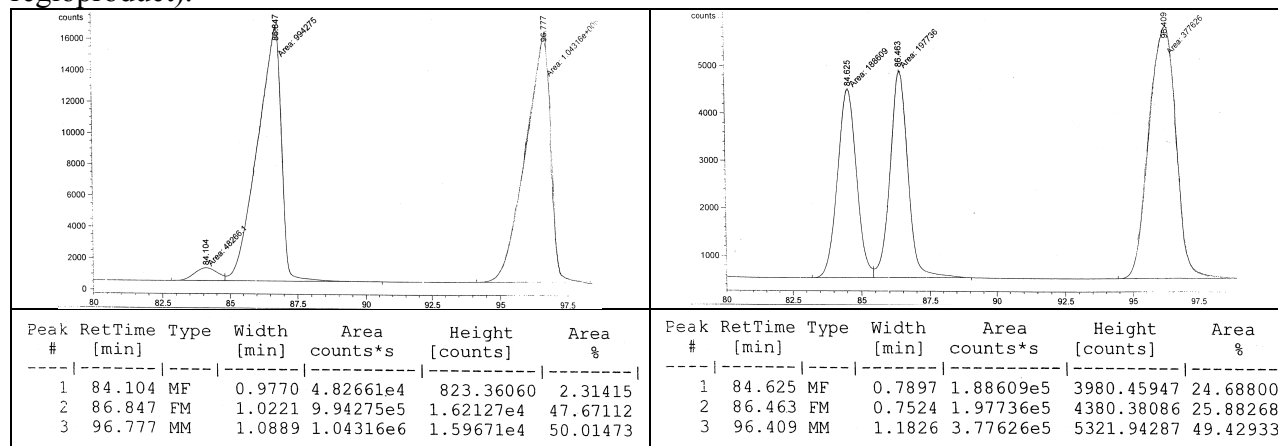

This mixture of regioisomeric products was derivatized to the corresponding Mosher ester products according to known literature precedent.<sup>4</sup> The product mixture was directly desilylated under the conditions of SiO<sub>2</sub>/MeOH. This mixture of alcohols was oxidized under standard conditions<sup>5</sup> to afford a mixture of pseudodiastereomeric products. These products were purified by silica gel chromatography (5% EtOAc/hexanes) to afford the following products:

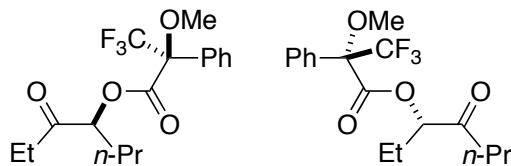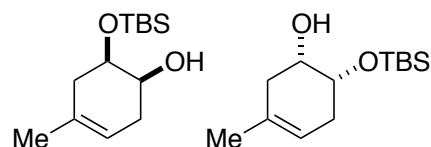

(1S,2R)-2-(*tert*-butyldimethylsilyloxy)-4-methylcyclohex-4-ene-1-ol (Table 1, entry 5, regioisomer A) and (1R,2S)-1-(*tert*-butyldimethylsilyloxy)-4-methylcyclohex-4-ene-2-ol (Table 1, entry 5, regioisomer B) were derivatized to

characterize the products of this transformation, although the enantiomeric purity was established on the direct products resulting from the enantioselective catalytic silylation. Chromatograms are illustrated below for 93% ee samples:

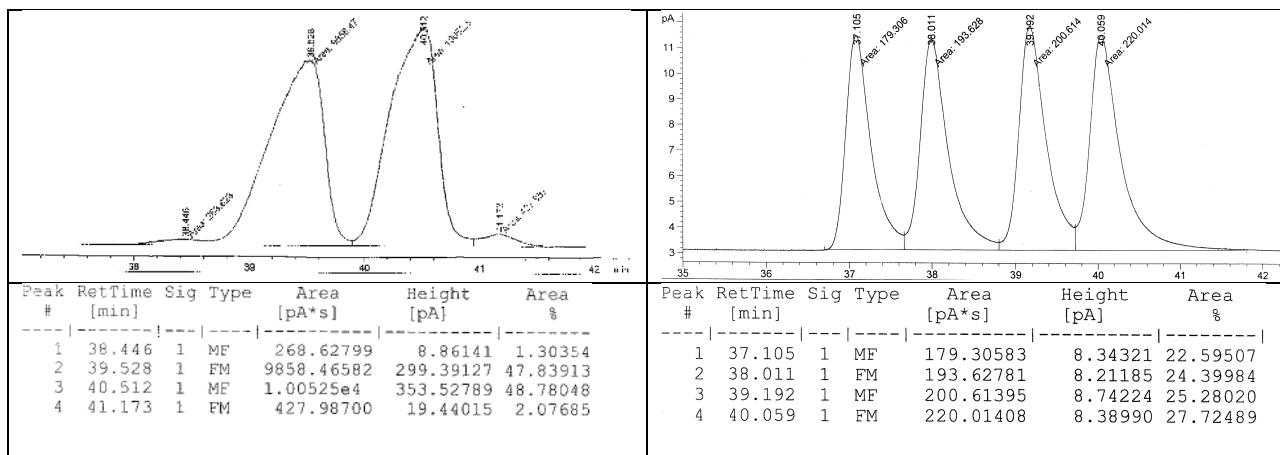

Below are examples of optically and regioisomerically enriched samples obtained after silica gel chromatography:

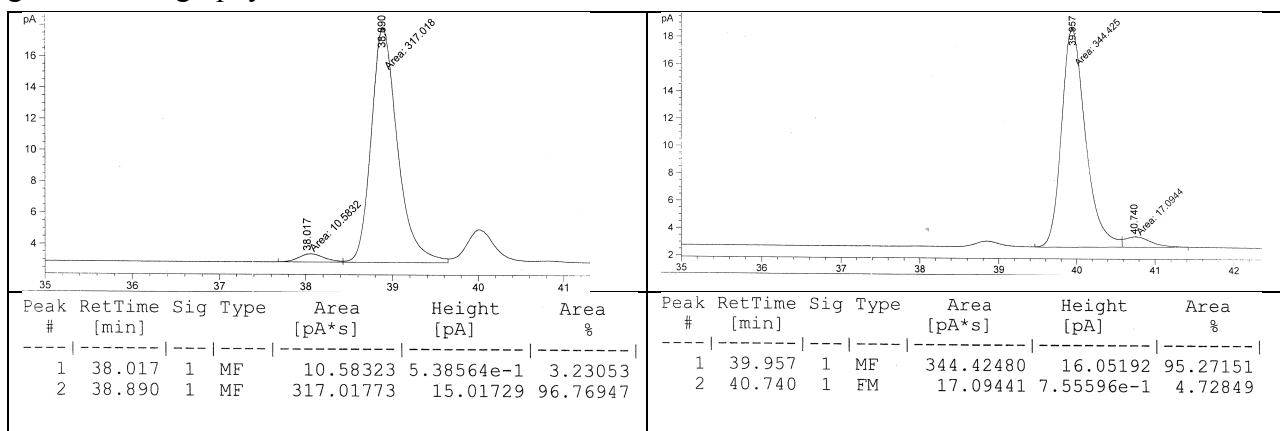

<sup>4</sup> T. R. Hoye, C. S. Jeffrey, F. Shao, *Nature Protocols* **2007**, 2, 2451-2458.

<sup>5</sup> E. J. Corey, W. Suggs, *Tetrahedron Lett.* **1975**, 16, 2647-2650.

This mixture of regioisomeric products was subjected to Sharpless asymmetric dihydroxylation (AD-mix- $\beta$ ) according to known literature precedent.<sup>6</sup> The products were purified by silica gel chromatography (60% EtOAc/hexanes) to afford the following product:

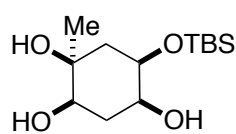

**IR** (neat, thin film): 3422 (br), 2953 (m), 2929 (m), 2885 (m), 2857 (m), 1462 (w), 1289 (m), 1061 (s), 1021 (s), 832 (s), 775 (s), 730 (m), 670 (m), 435 (w)  $\text{cm}^{-1}$ . **<sup>1</sup>H NMR** ( $\text{CDCl}_3$ , 400 MHz):  $\delta$  4.00 (1H, ddd,  $J = 9.2, 7.2, 3.2$  Hz), 3.76 (1H, q,  $J = 3.2$  Hz), 3.79 (1H, m), 2.41 (1H, s), 2.03 (1H, dt,  $J = 13.6, 4.4$  Hz), 1.96- 1.74 (4H, m), 1.25 (3H, s), 0.89 (9H, s), 0.084 (3H, s), 0.076 (3H, s). **<sup>13</sup>C NMR** ( $\text{CDCl}_3$ , 100 MHz):  $\delta$  72.3, 70.4, 70.3, 69.1, 39.8, 34.1, 27.6, 26.0, 18.3, -4.3, -4.6. **HRMS**  $[\text{M}+\text{H}]^+$ : Calculated for  $\text{C}_{13}\text{H}_{29}\text{O}_4\text{Si}$ : 277.1835; Found: 277.1828. **Optical Rotation**:  $[\alpha]_{\text{D}}^{20} -2.0$  ( $c = 1.0, \text{CHCl}_3$ ).

In order to obtain a pure sample of the other regioisomer (contaminated with methane sulfonamide after column chromatography), the acetone derivative was prepared according to a known procedure.<sup>7</sup> The product was purified by silica gel chromatography (10% EtOAc/hexanes) to afford the following product:

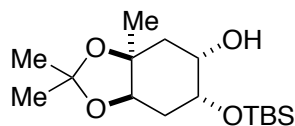

**IR** (neat, thin film): 3574 (br), 2984 (m), 2955 (m), 2931 (m), 2859 (m), 1371 (m), 1234 (m), 1185 (s), 1097 (s), 1074 (s), 927 (m), 812 (s), 778 (s), 671 (m), 519 (w)  $\text{cm}^{-1}$ . **<sup>1</sup>H NMR** ( $\text{CDCl}_3$ , 400 MHz):  $\delta$  4.00 (1H, ddd,  $J = 10.8, 5.2, 3.2$  Hz), 3.91 (1H, m), 3.81 (1H, m), 2.31 (1H, dd,  $J = 2.0, 1.6$  Hz), 2.10-1.80 (4H, m), 1.46 (3H, s), 1.43 (3H, s), 1.33 (3H, s), 0.893 (9H, s), 0.099 (3H, s), 0.091 (3H, s). **<sup>13</sup>C NMR** ( $\text{CDCl}_3$ , 100 MHz):  $\delta$  107.3, 79.9, 77.9, 69.8, 67.9, 39.3, 29.5, 28.5, 27.2, 26.4, 26.0, 18.2, -4.2, -4.5. **HRMS**  $[\text{M}+\text{H}]^+$ : Calculated for  $\text{C}_{16}\text{H}_{33}\text{O}_4\text{Si}$ : 317.2148; Found: 317.2157. **Optical Rotation**:  $[\alpha]_{\text{D}}^{20} -1.0$  ( $c = 1.0, \text{CHCl}_3$ ).

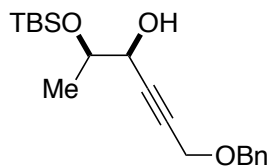

**(2R,3S)-6-(benzyloxy)-2-(tert-butyldimethylsilyloxy)hex-4-yn-3-ol** (Table 1, entry 6, regioisomer A): **IR** (neat, thin film): 2953 (m), 2929 (m), 2885 (m), 2856 (m), 1472 (w), 1454 (w), 1254 (m), 1097 (s), 835 (s), 777 (s)  $\text{cm}^{-1}$ . **<sup>1</sup>H NMR** ( $\text{CDCl}_3$ , 400 MHz):  $\delta$  7.38-7.28 (5H, m), 4.61 (2H, s), 4.34 (1H, br), 4.23 (2H, dd,  $J = 2.4, 1.6$  Hz), 3.95 (1H, qd,  $J = 6.0, 4.0$  Hz), 2.42 (1H, d,  $J = 5.2$  Hz), 1.25 (3H, d,  $J = 6.4$  Hz), 0.907 (9H, s), 0.103 (6H, s). **<sup>13</sup>C NMR** ( $\text{CDCl}_3$ , 100 MHz):  $\delta$  137.6, 128.6, 128.2, 128.0, 84.8, 82.2, 71.7, 71.2, 67.3, 57.6, 26.0, 18.5, 18.3, -4.1, -4.5. **HRMS**  $[\text{M}+\text{H}]^+$ : Calculated for  $\text{C}_{19}\text{H}_{31}\text{O}_3\text{Si}$ : 335.2043; Found: 335.2057. **Optical Rotation**:  $[\alpha]_{\text{D}}^{20} 0$  ( $c = 1.0, \text{CHCl}_3$ ).

<sup>6</sup> D. P. G. Hamon, K. L. Tuck, H. S. Christie, *Tetrahedron* **2001**, 57, 9499-9508.

<sup>7</sup> Z. Liu, B. -H. Hu, P. B. Messersmith, *Tetrahedron Lett.* **2008**, 49, 5519-5521.



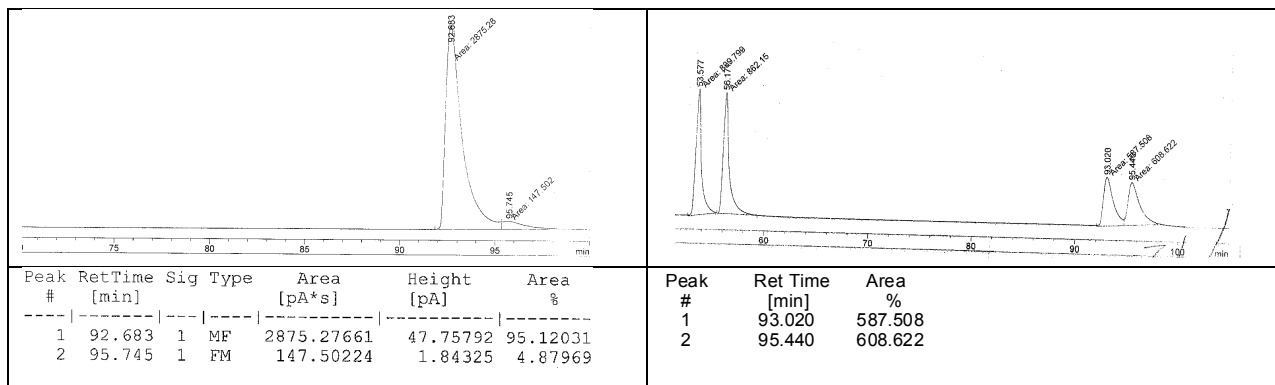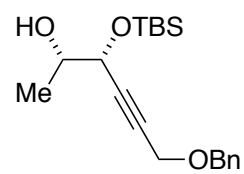

**(2S,3R)-6-(benzyloxy)-3-(tert-butyldimethylsilyloxy)hex-4-yn-2-ol (Table 1, entry 6, regioisomer B):** IR (neat, thin film): 2955 (m), 2929 (m), 2889 (m), 2856 (m), 1472 (w), 1463 (w), 1252 (m), 1098 (s), 838 (s), 778 (s)  $\text{cm}^{-1}$ .  $^1\text{H}$  NMR ( $\text{CDCl}_3$ , 400 MHz):  $\delta$  7.37-7.27 (5H, m), 4.60 (2H, s), 4.34 (1H, dt,  $J = 4.4, 1.6$  Hz), 4.23 (2H, d,  $J = 1.6$  Hz), 3.81 (1H, qd,  $J = 6.0, 4.4$  Hz), 2.32 (1H, br), 1.25 (3H, d,  $J = 6.0$  Hz), 0.928 (9H, s), 0.184 (3H, s), 0.150 (3H, s).  $^{13}\text{C}$  NMR ( $\text{CDCl}_3$ , 100 MHz):  $\delta$  137.6, 128.6, 128.2, 128.0, 85.1, 82.4, 71.7, 70.9, 68.1, 57.6, 26.0, 18.5, 18.0, -4.2, -4.8. HRMS  $[\text{M}+\text{H}]^+$ : Calculated for  $\text{C}_{19}\text{H}_{31}\text{O}_3\text{Si}$ : 335.2043; Found: 335.2039. **Optical Rotation:**  $[\alpha]_D^{20}$  -22 ( $c = 1.0, \text{CHCl}_3$ ).

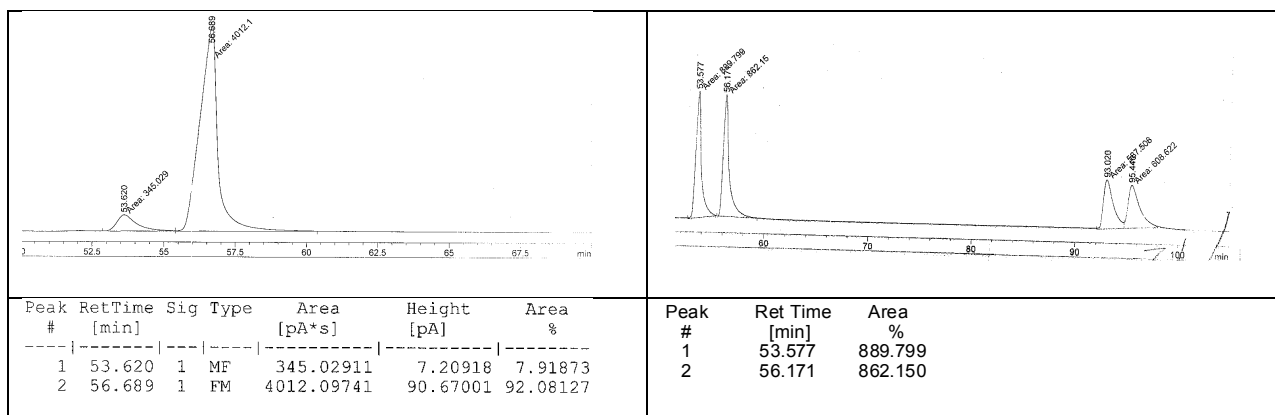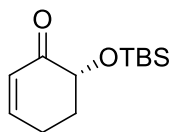

**(R)-6-(tert-butyldimethylsilyloxy)cyclohex-2-enone (7, Scheme 3):** IR (neat, thin film): 2954 (m), 2929 (m), 2888 (w), 2856 (m), 1699 (s), 1255 (m), 1141 (s)  $\text{cm}^{-1}$ .  $^1\text{H}$  NMR ( $\text{CDCl}_3$ , 500 MHz):  $\delta$  6.89 (1H, dddd,  $J = 16.5, 8.0, 5.0, 1.5$  Hz), 5.98 (1H, ddd,  $J = 11.0, 2.5, 1.5$  Hz), 4.17 (1H, dd,  $J = 11.5, 5.0$  Hz), 2.47-2.54 (1H, m), 2.38-2.46 (1H, m), 2.14-2.19 (1H, m), 2.01-2.09 (1H, m), 0.91 (1H, s), 0.16 (3H, s), 0.08 (3H, s).  $^{13}\text{C}$  NMR ( $\text{CDCl}_3$ , 100 MHz):  $\delta$  198.9, 149.6, 128.7, 74.4, 32.7, 26.0, 25.5, 18.7, -4.3, -5.2. HRMS  $[\text{M}+\text{H}]^+$ : Calculated for  $\text{C}_{12}\text{H}_{22}\text{O}_2\text{Si}$ : 226.1389; Found: *submitted*. **Optical Rotation:**  $[\alpha]_D^{20}$  +47 ( $c = 0.6, \text{CDCl}_3$ ).

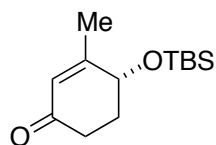

**(R)-4-(tert-butyldimethylsilyloxy)-3-methylcyclohex-2-enone (8, Scheme 3):** IR (neat, thin film): 2954 (m), 1674 (s), 1628 (w), 1253 (s), 1102 (s)  $\text{cm}^{-1}$ .  $^1\text{H}$  NMR ( $\text{CDCl}_3$ , 400 MHz): 5.83 (1H, br. s), 4.35 (1H, dd,  $J = 8.0, 5.0$  Hz),

2.56 (1H, dt,  $J = 16.5, 5.0$  Hz), 2.31 (1H, ddd,  $J = 16.5, 12.0, 5.0$  Hz), 2.16 (1H, m), 1.99 (1H, m), 1.98 (3H, s), 0.92 (9H, s), 0.14 (3H, s), 0.13 (3H, s).  $^{13}\text{C}$  NMR ( $\text{CDCl}_3$ , 100 MHz):  $\delta$  198.8, 164.4, 126.8, 69.9, 35.4, 32.8, 26.0, 21.3, 18.3, -4.0, -4.6. HRMS  $[\text{M}+\text{H}]^+$ : Calculated for  $\text{C}_{13}\text{H}_{25}\text{O}_2\text{Si}$ : 241.1624; Found: 241.1619. **Optical Rotation**:  $[\alpha]_D^{20} +15$  ( $c = 0.5$ ,  $\text{CDCl}_3$ ).

### Enantioselective synthesis of sapinofuranone A

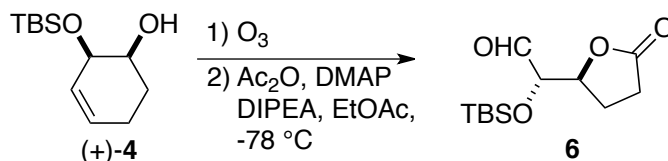

**(S)-2-(tert-butyldimethylsilyloxy)-2-((S)-5-oxotetrahydrofuran-2-yl)acetaldehyde (6, Scheme 3):** A solution of TBS ether (+)-4 (0.19 g, 0.83 mmol) in EtOAc (100 mL) at  $-78$  °C was purged with  $\text{O}_3$  until the solution turned blue. The system was then purged with  $\text{N}_2$  until the blue color had disappeared (approximately 15 min). To this solution were added  $\text{Ac}_2\text{O}$  (0.25 g, 2.5 mmol) and DIPEA (0.52 g, 4.0 mmol) using a microsyringe. The mixture was allowed to stir for 5 min. prior to the addition of DMAP (0.01 g, 0.08 mmol). The reaction mixture was quenched by the addition of saturated aqueous  $\text{NaHCO}_3$  solution (50 mL). The mixture was partitioned and the organic layer was collected. The aqueous layer was washed with EtOAc (2 x 50 mL). The organic layers were combined and dried over anhydrous  $\text{MgSO}_4$ . The mixture was filtered and solvent was removed in vacuo to yield a light yellow oil (~300 mg). This was purified by Florisil<sup>®</sup> chromatography (200 mesh, 30% EtOAc/hexanes) to yield desired product 6 as a colorless oil (0.18 g, 83% yield over 2 steps).

**IR** (neat, thin film): 2956 (s), 2930 (s), 2857 (s), 1781 (s), 1734 (s), 1463 (w), 1361 (w), 1256 (m), 1135 (s), 838 (s), 780 (m), 541 (w)  $\text{cm}^{-1}$ .  $^1\text{H}$  NMR ( $\text{CDCl}_3$ , 400 MHz):  $\delta$  9.68 (1H, s), 4.87 (1H, td,  $J = 7.2, 2.8$  Hz), 3.51 (1H, d,  $J = 10.0$  Hz), 3.45 (1H, d,  $J = 10.8$  Hz), 2.77 (1H, s), 2.36 (1H, s), 1.11 (3H, s), 0.935 (9H, s), 0.143 (3H, s), 0.120 (3H, s).  $^{13}\text{C}$  NMR ( $\text{CDCl}_3$ , 100 MHz):  $\delta$  201.7, 176.8, 79.3, 78.8, 28.5, 25.9, 21.7, 18.4, -4.67, -4.73. HRMS  $[\text{M}+\text{H}]^+$ : Calculated for  $\text{C}_{12}\text{H}_{23}\text{O}_4\text{Si}$ : 259.1366; Found: 259.1359. **Optical Rotation**:  $[\alpha]_D^{20} -15$  ( $c = 1.0$ ,  $\text{CHCl}_3$ ).

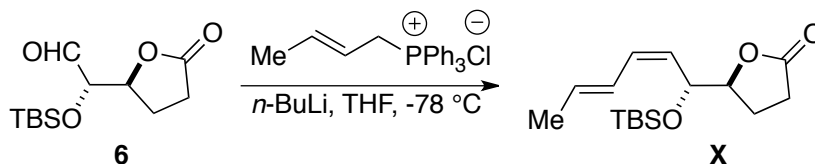

**(S)-5-((R,2Z,4E)-1-(tert-butyldimethylsilyloxy)hexa-2,4-dienyl)dihydrofuran-2(3H)-one (TBS-sapinofuranone A, Scheme 3):** A suspension of the Wittig salt (0.25 g, 0.71 mmol) in THF (5 mL) is deprotonated by the slow addition (approximately 5 min.) of freshly titrated  $n\text{-BuLi}$  (323  $\mu\text{L}$ , 0.71 mmol) by microsyringe. This deep red mixture is allowed to stir at room temperature for 1 h. The contents of this mixture are then transferred to a syringe and fitted to a syringe pump. This mixture is then added slowly (over 5 h) to a solution of aldehyde 6 (0.18 g, 0.68 mmol) in THF (5 mL) at  $-78$  °C. The reaction is allowed to stir at this temperature for an additional 12 h. The reaction mixture was quenched by the addition of saturated aqueous  $\text{NaHCO}_3$  solution (50 mL) and diluted with EtOAc (50 mL). The mixture was partitioned and the organic layer was collected. The

aqueous layer was washed with EtOAc (2 x 50 mL). The organic layers were combined and dried over anhydrous MgSO<sub>4</sub>. The mixture was filtered and solvent was removed in vacuo to yield an orange oil. This reaction mixture was purified by silica gel chromatography (10% EtOAc/hexanes) to yield desired product **X** as a colorless oil (0.11 g, 55% yield).

**IR** (neat, thin film): 2956 (m), 2930 (m), 2886 (m), 2857 (m), 1781 (s), 1471 (m), 1255 (m), 1105 (m), 894 (m), 835 (s), 779 (m). **<sup>1</sup>H NMR** (CDCl<sub>3</sub>, 400 MHz): δ 6.24 (1H, dd, *J* = 13.6, 12.4 Hz), 6.03 (1H, t, *J* = 10.8 Hz), 5.79 (1H, dq, *J* = 14.0, 6.8 Hz), 5.14 (1H, dd, *J* = 11.2, 8.0 Hz), 4.85 (1H, d, *J* = 8.4 Hz), 4.42 (1H, ddd, *J* = 8.0, 4.4, 2.4 Hz), 2.60 (1H, m), 2.42 (1H, ddd, *J* = 17.6, 10.8, 5.6 Hz), 2.33-2.25 (1H, m), 2.16-2.07 (1H, m), 1.81 (3H, d, *J* = 6.8 Hz), 0.87 (9H, s), 0.066 (3H, s), 0.044 (3H, s). **<sup>13</sup>C NMR** (CDCl<sub>3</sub>, 100 MHz): δ 177.7, 133.4, 131.1, 126.7, 126.2, 82.6, 70.5, 28.9, 26.0, 21.2, 18.7, 18.3, -4.4, -4.7. **HRMS** [M+H]<sup>+</sup>: Calculated for C<sub>16</sub>H<sub>29</sub>O<sub>3</sub>Si: 297.1886; Found: 297.1901. **Optical Rotation**: [α]<sub>D</sub><sup>20</sup> +47 (*c* = 1.0, CHCl<sub>3</sub>).

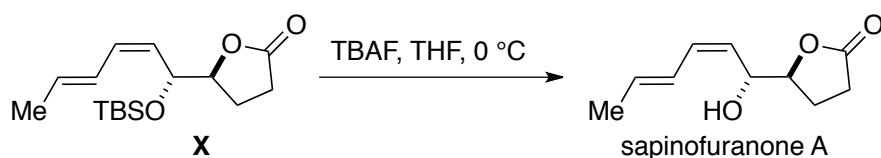

**Sapinofuranone A (Scheme 3)**: To lactone **X** (25.0 mg, 0.084 mmol) in THF (2 mL) at 0 °C was added a solution of TBAF in THF (1 M, 101 μL, 0.10 mmol). The reaction was allowed to stir at this temperature for 45 min. The reaction mixture was diluted with Et<sub>2</sub>O (50 mL) and quenched by the addition of a HCl<sub>(aq.)</sub> solution (1 M, 25 mL). The mixture was partitioned and the organic layer was collected. The aqueous layer was washed with diethyl ether (2 x 50 mL). The organic layers were combined and dried over anhydrous MgSO<sub>4</sub>. The mixture was filtered and solvent was removed in vacuo to yield a yellow oil. This reaction mixture was purified by silica gel chromatography (35% EtOAc/hexanes) to yield desired product **Sapinofuranone A** as a colorless oil (14.4 mg, 94% yield).

**IR** (neat, thin film): 3432 (br), 3023 (w), 2916 (w), 2853 (w), 1771 (s), 1655 (w), 1186 (m), 951 (m), 823 (m), 755 (w), 672 (w), 533 (w). **<sup>1</sup>H NMR**: (CDCl<sub>3</sub>, 400 MHz): δ 6.30 (1H, ddq, *J* = 13.7, 11.2, 1.8 Hz), 6.15 (1H, dd, *J* = 11.2, 11.0 Hz), 5.82 (1H, dq, *J* = 13.7, 6.8 Hz), 5.20 (1H, dd, *J* = 11.0, 8.4 Hz), 4.88 (1H, dd, *J* = 8.4, 3.1 Hz), 4.51 (1H, dt, *J* = 7.2, 3.1 Hz), 2.51 (2H, m), 2.20 (2H, m), 1.80 (3H, dd, *J* = 6.8, 1.8 Hz). **<sup>13</sup>C NMR** (CDCl<sub>3</sub>, 100 MHz): δ 177.5, 134.0, 133.3, 126.2, 123.9, 82.5, 68.8, 28.8, 21.6, 18.6. [M-OH]<sup>+</sup>: Calculated for C<sub>10</sub>H<sub>13</sub>O<sub>2</sub>: 165.0916; Found: 165.0910. **Optical Rotation**: [α]<sub>D</sub><sup>20</sup> +16 (*c* = 1.3, CDCl<sub>3</sub>).

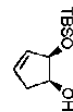

Table 1, entry 2, A

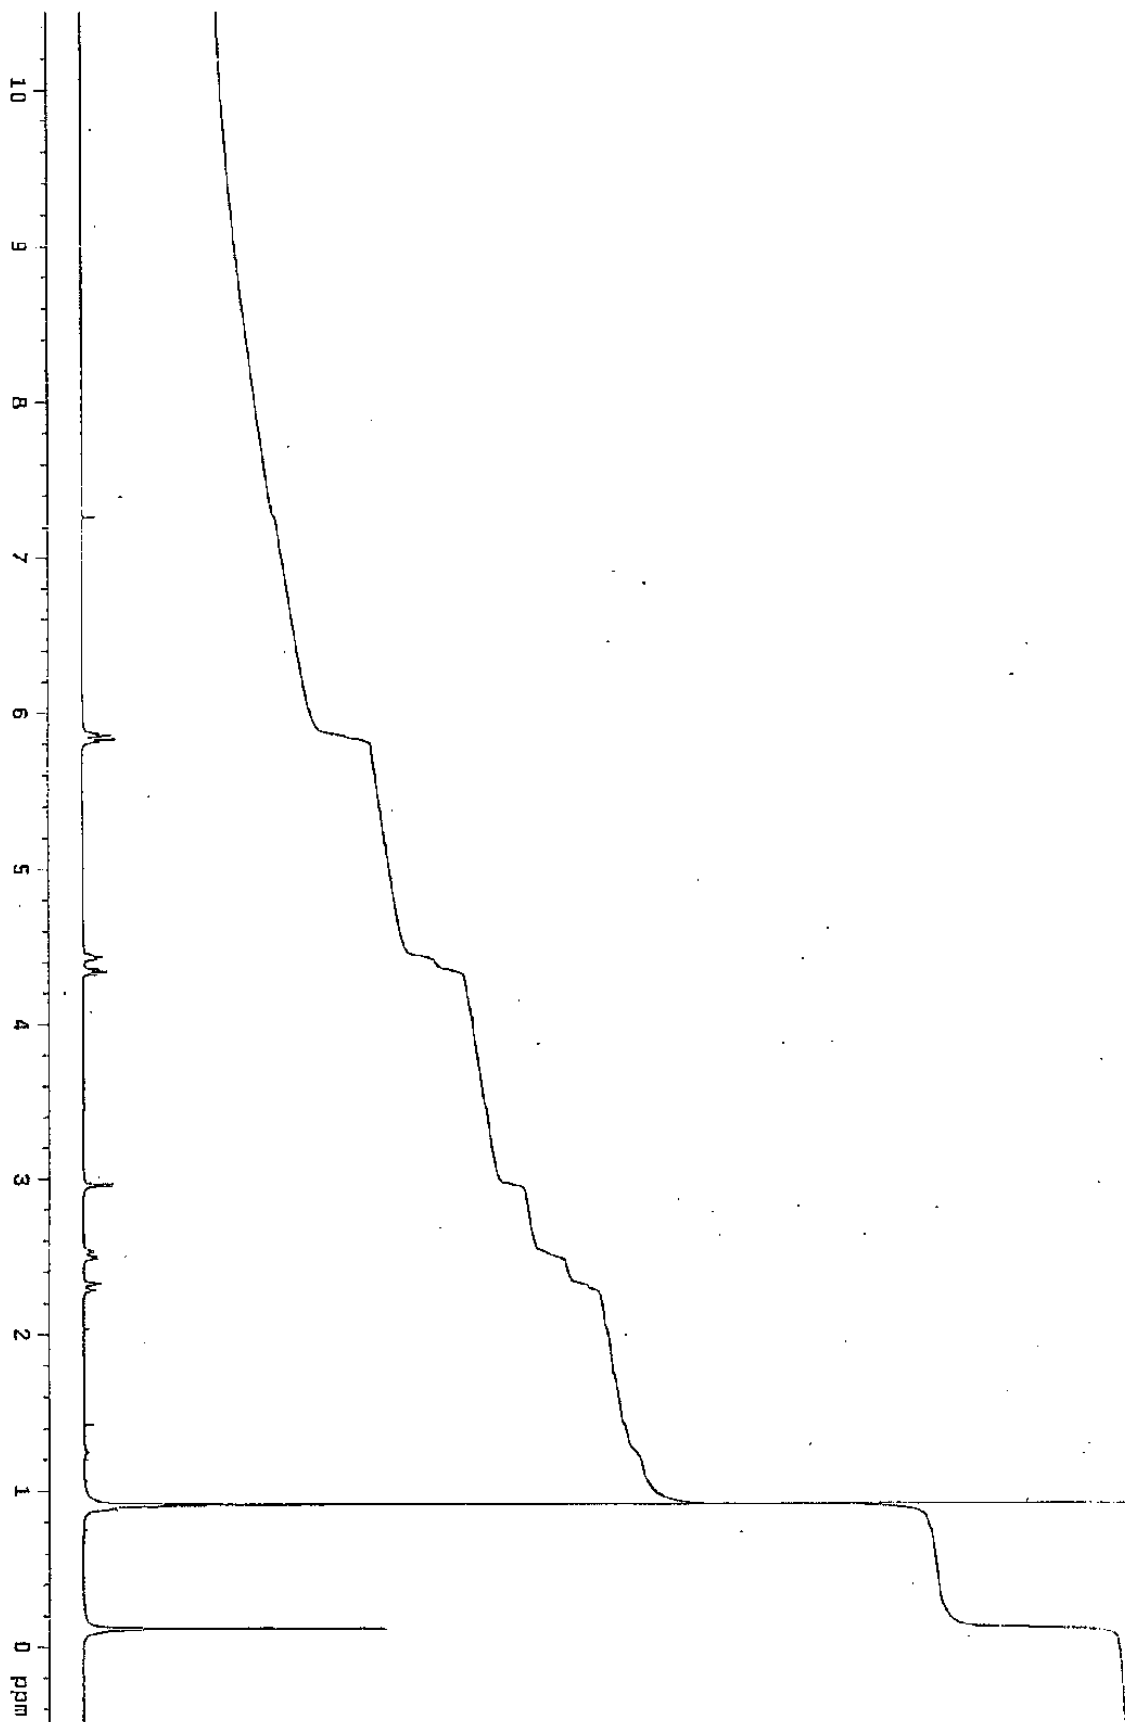

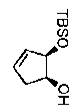

Table 1, entry 2, A

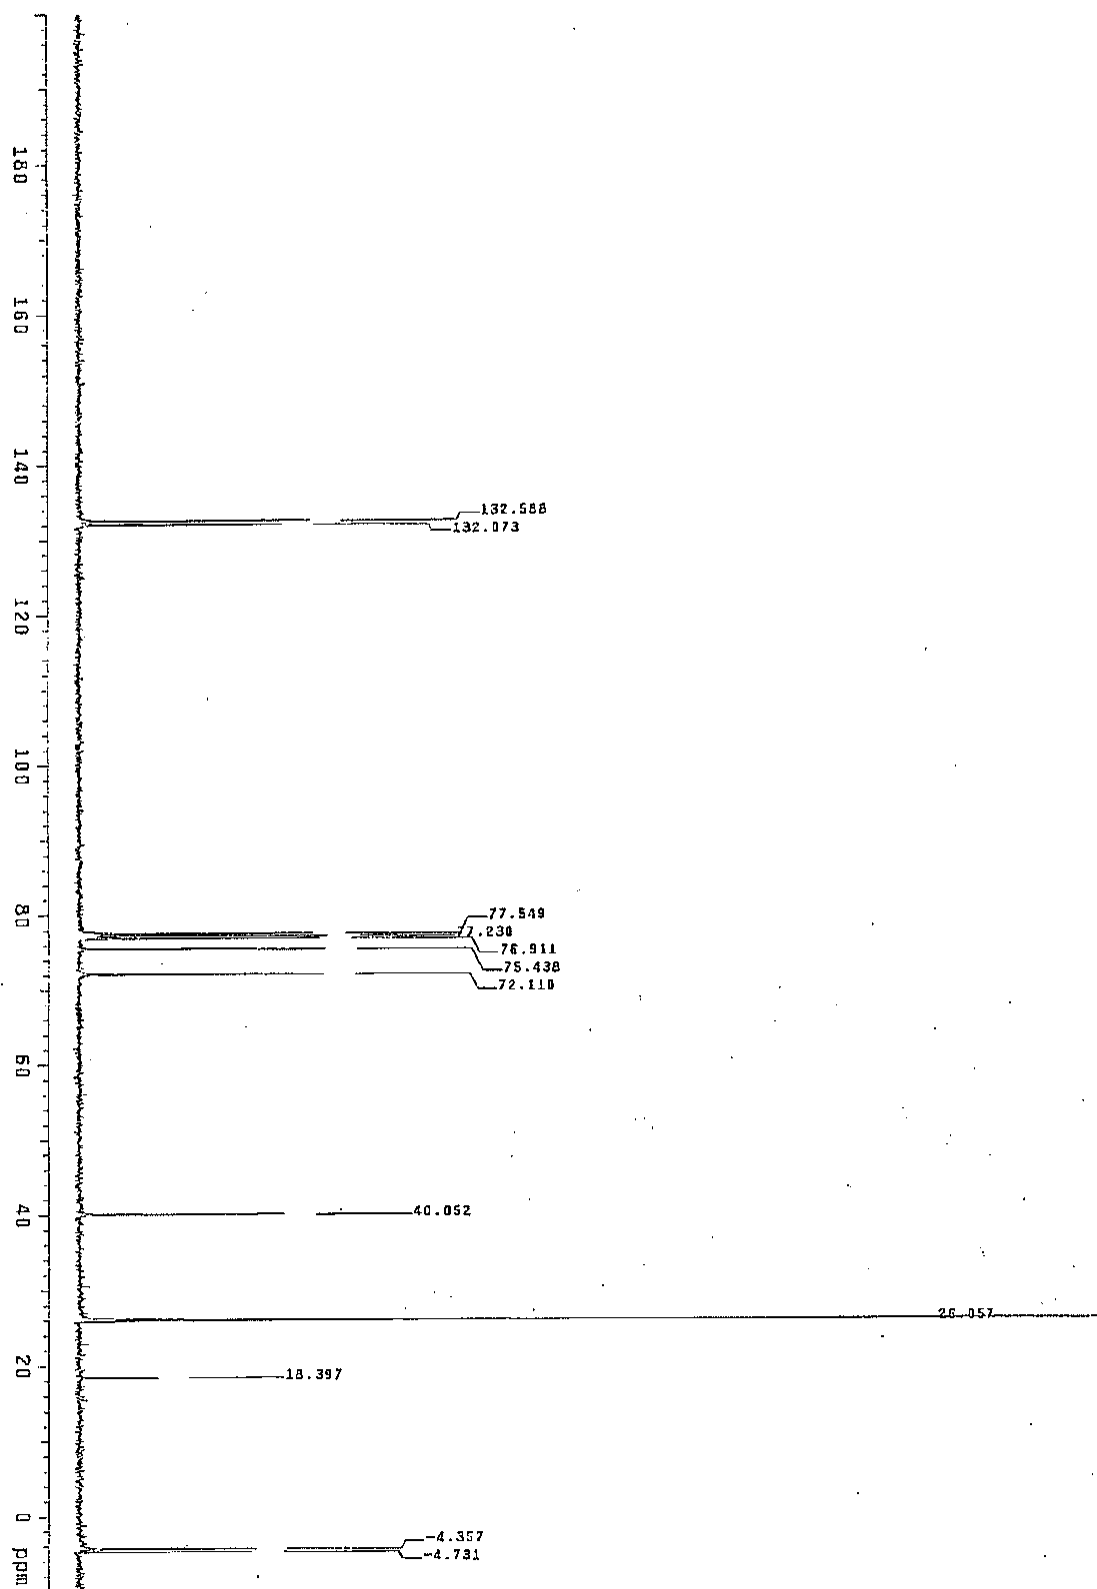

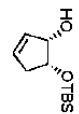

Table 1, entry 2, **B**

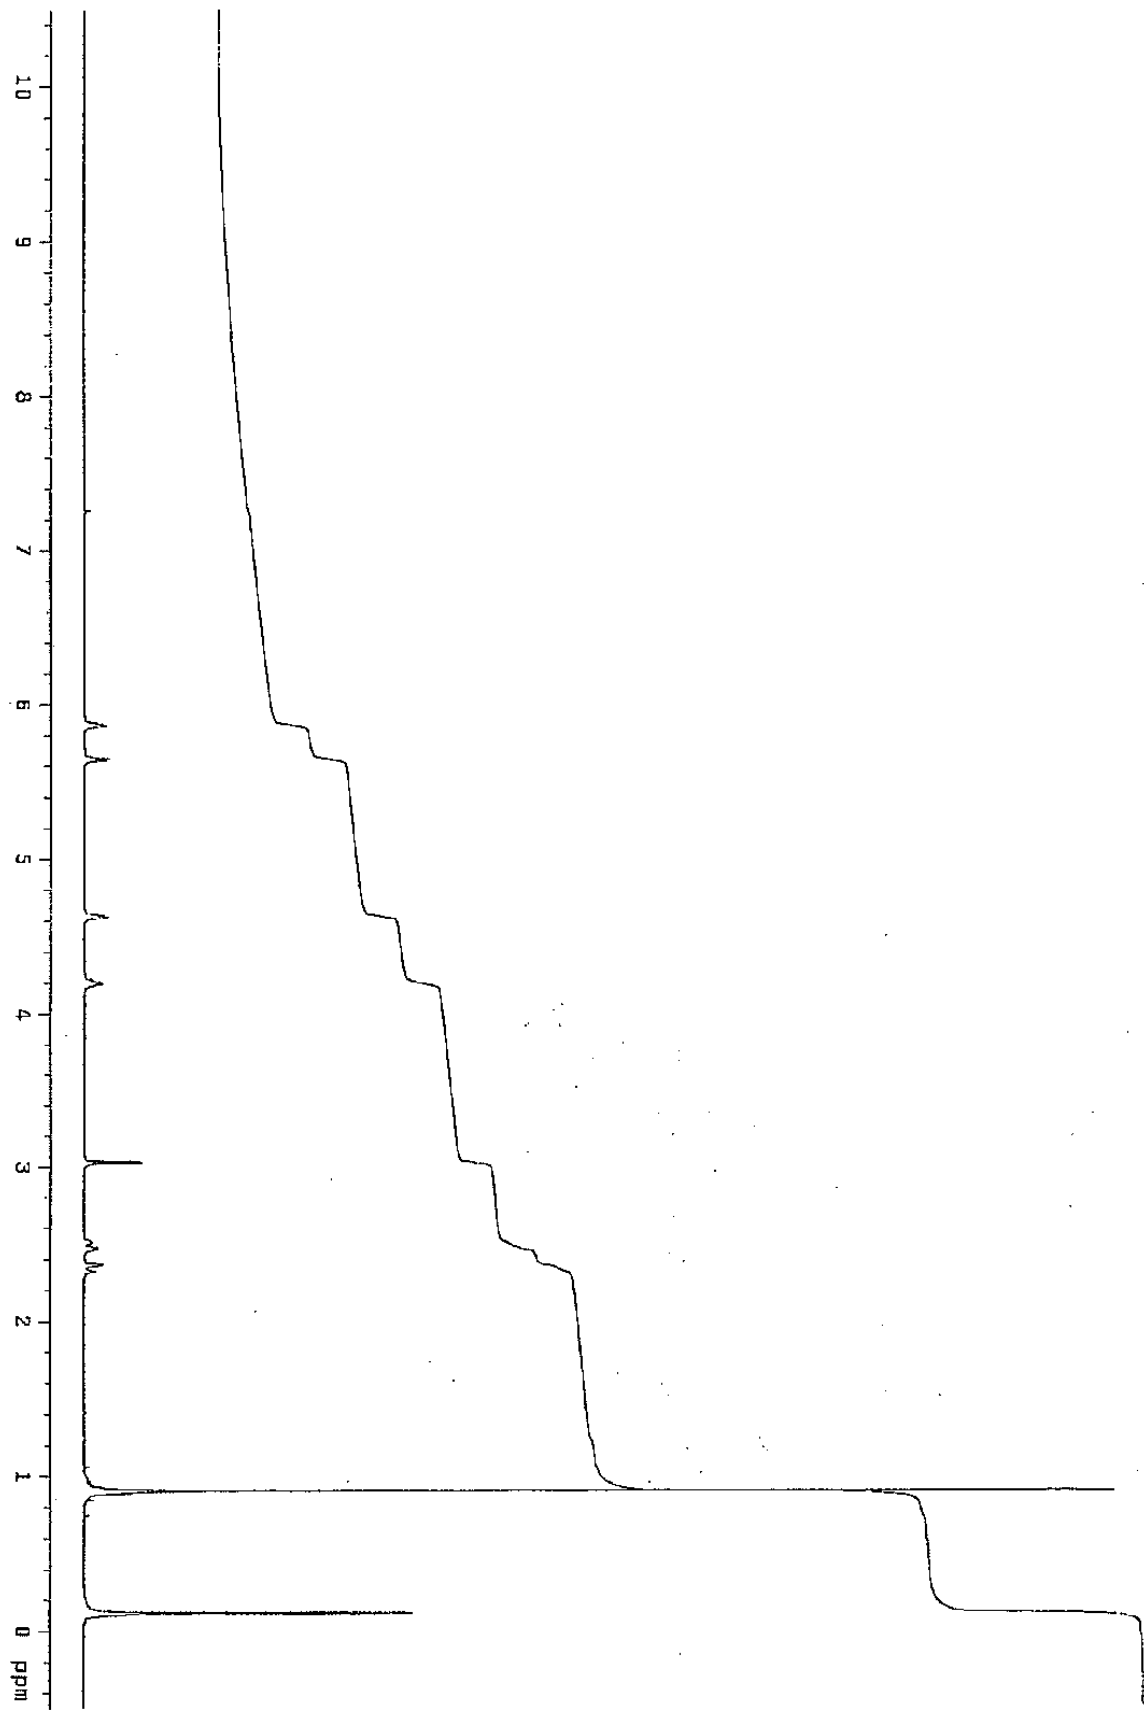

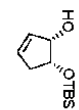

Table 1, entry 2, B

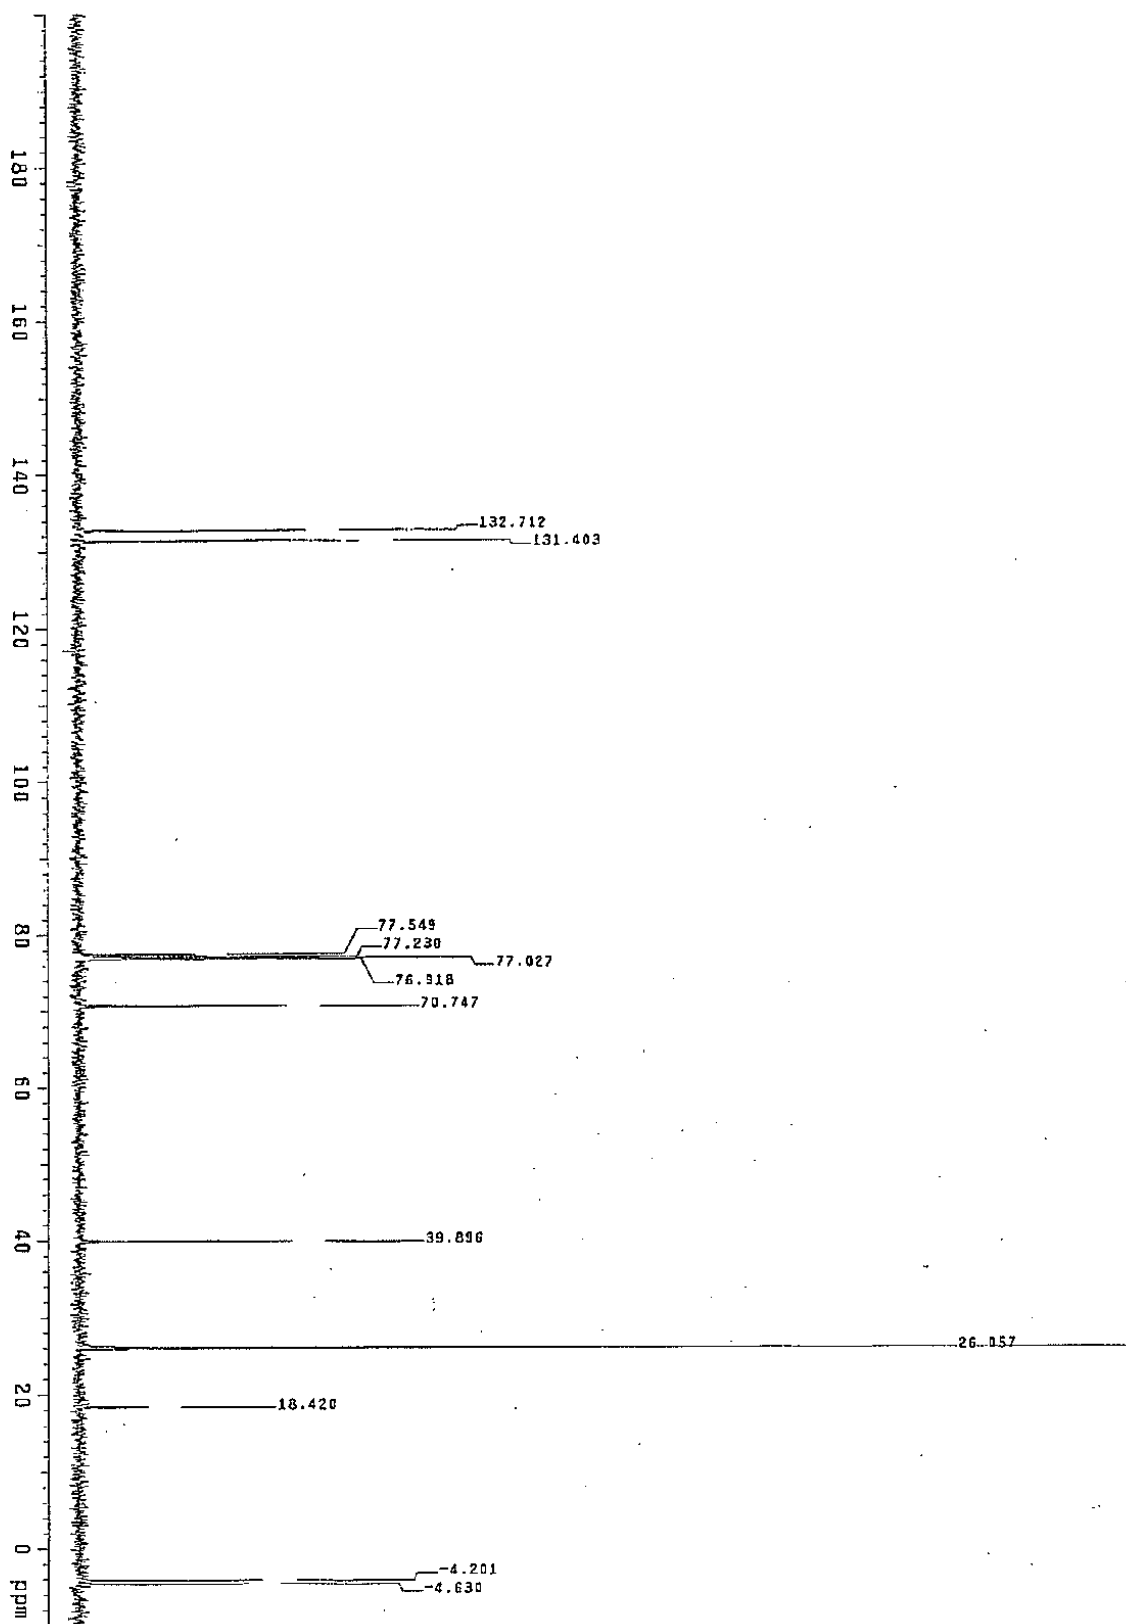

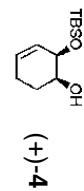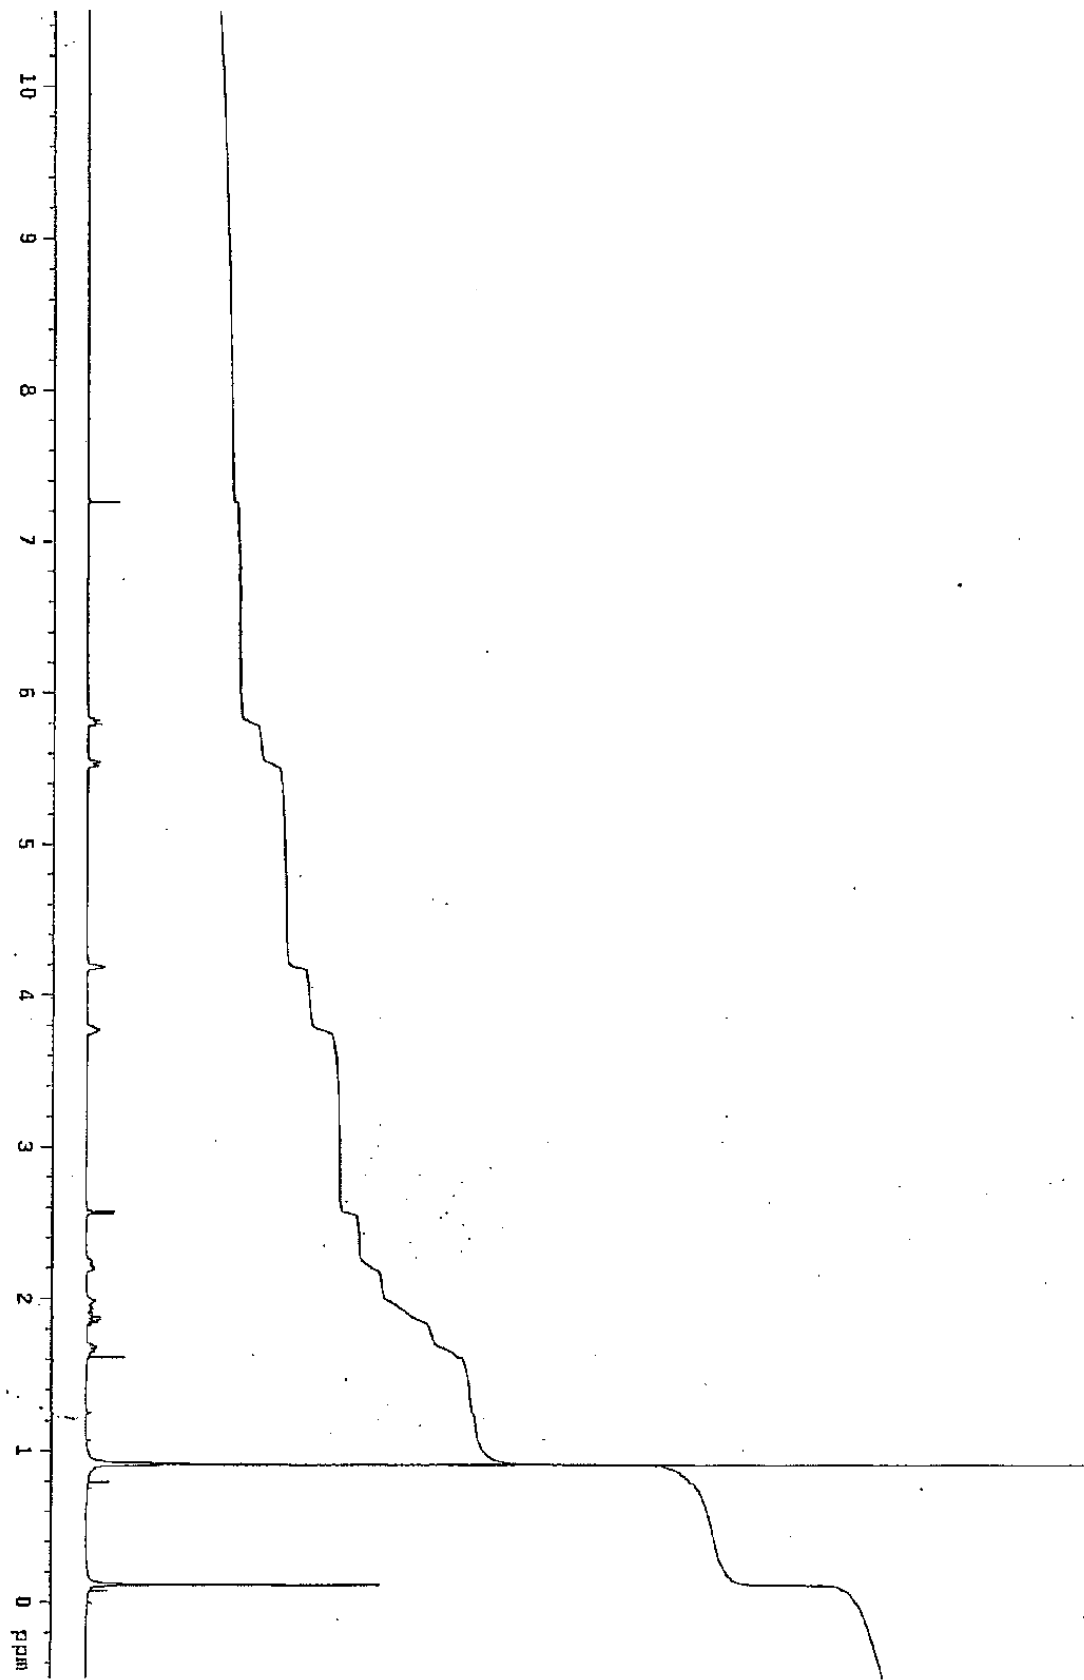



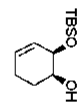

(+)-4

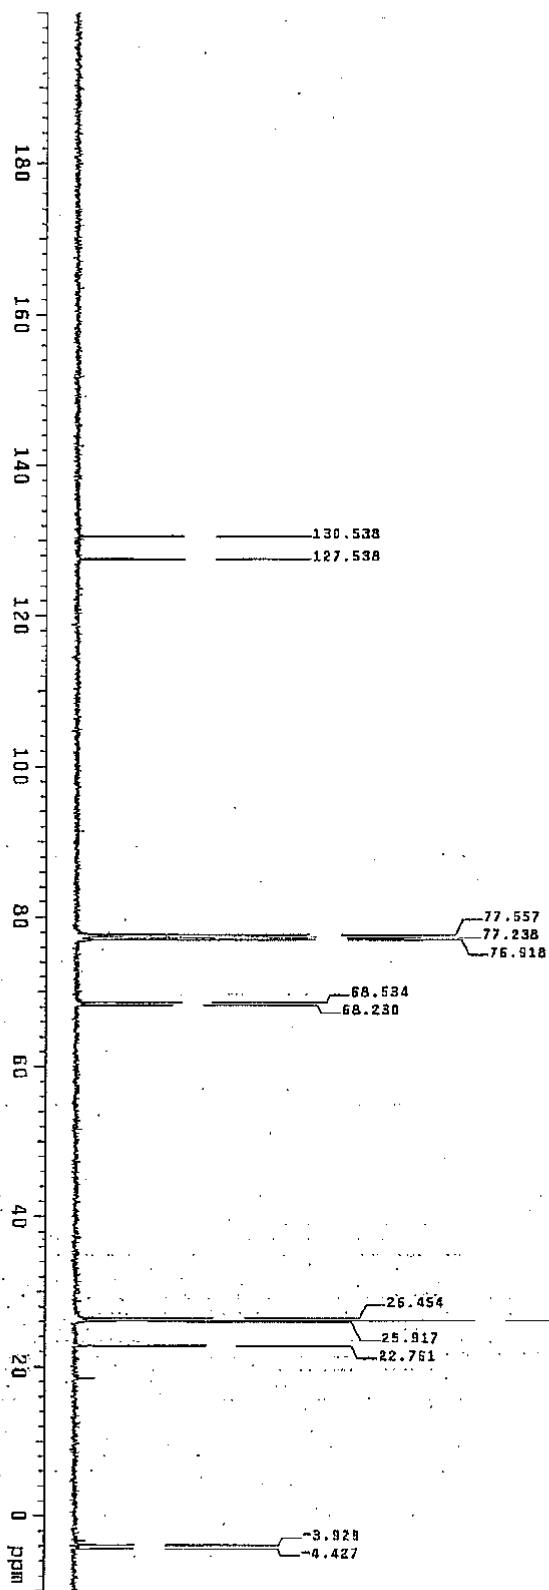

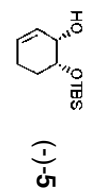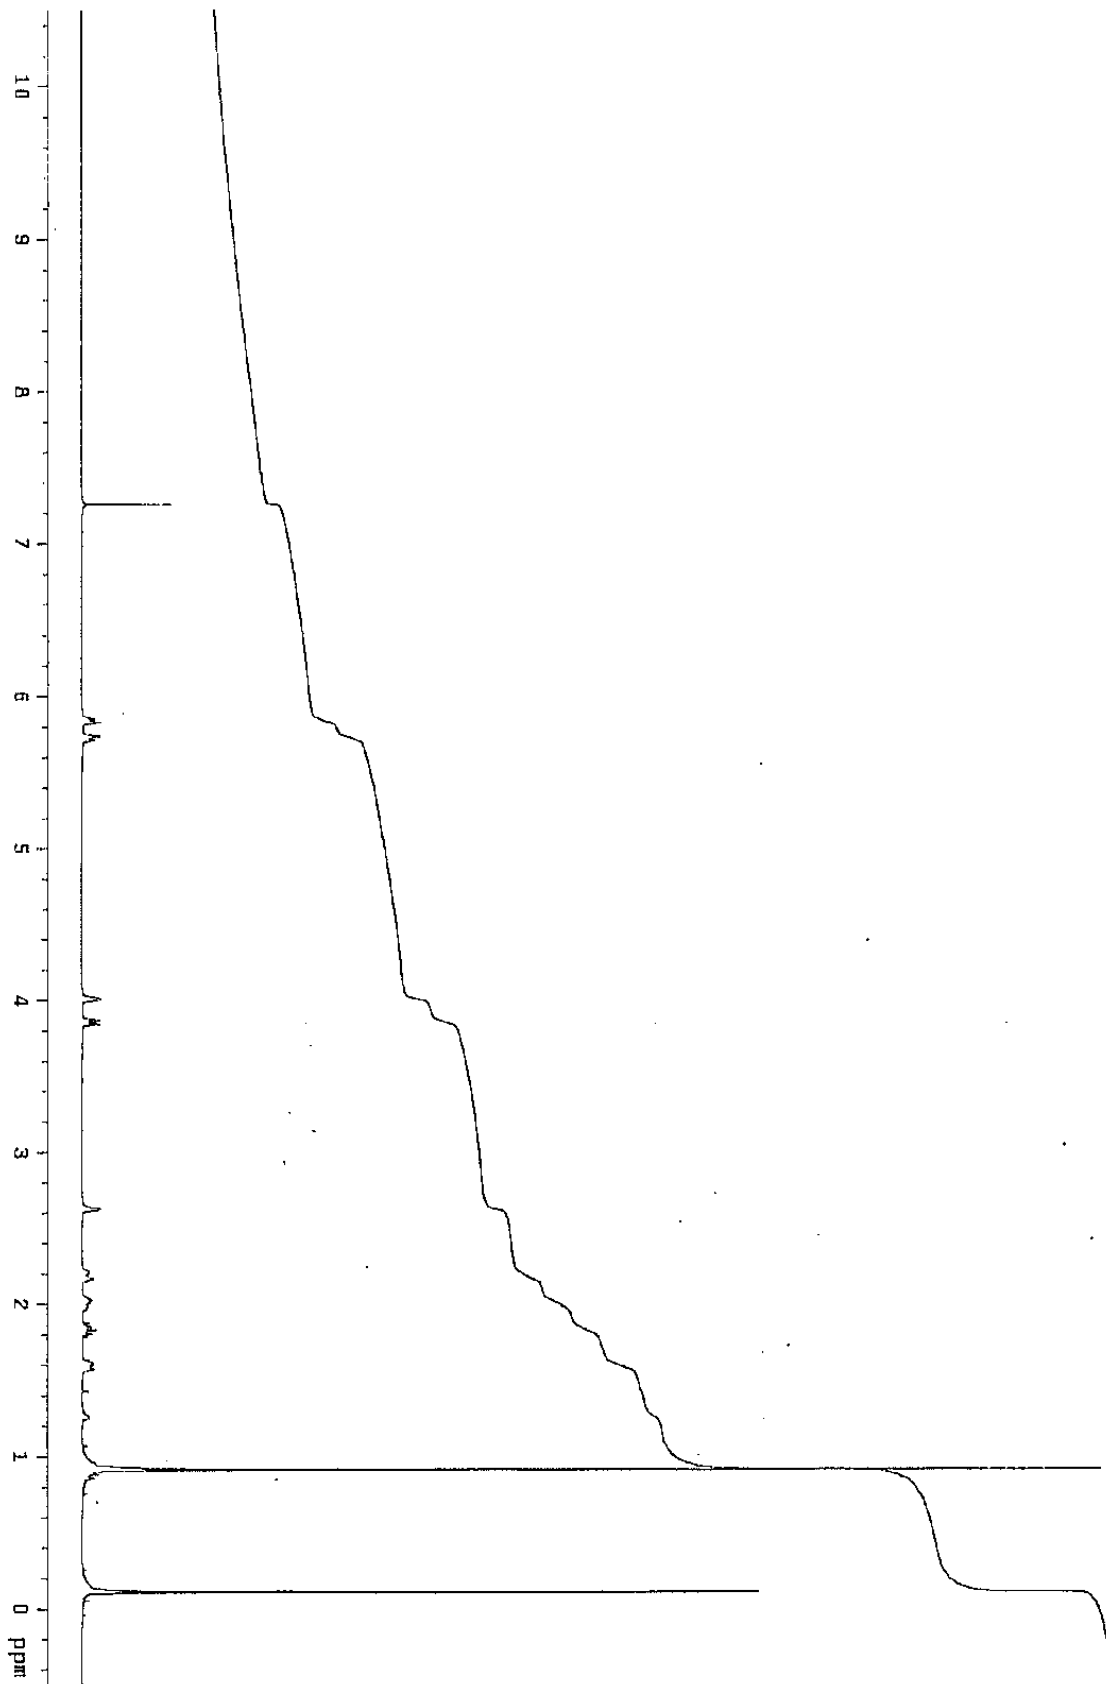

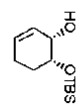

(-)-5

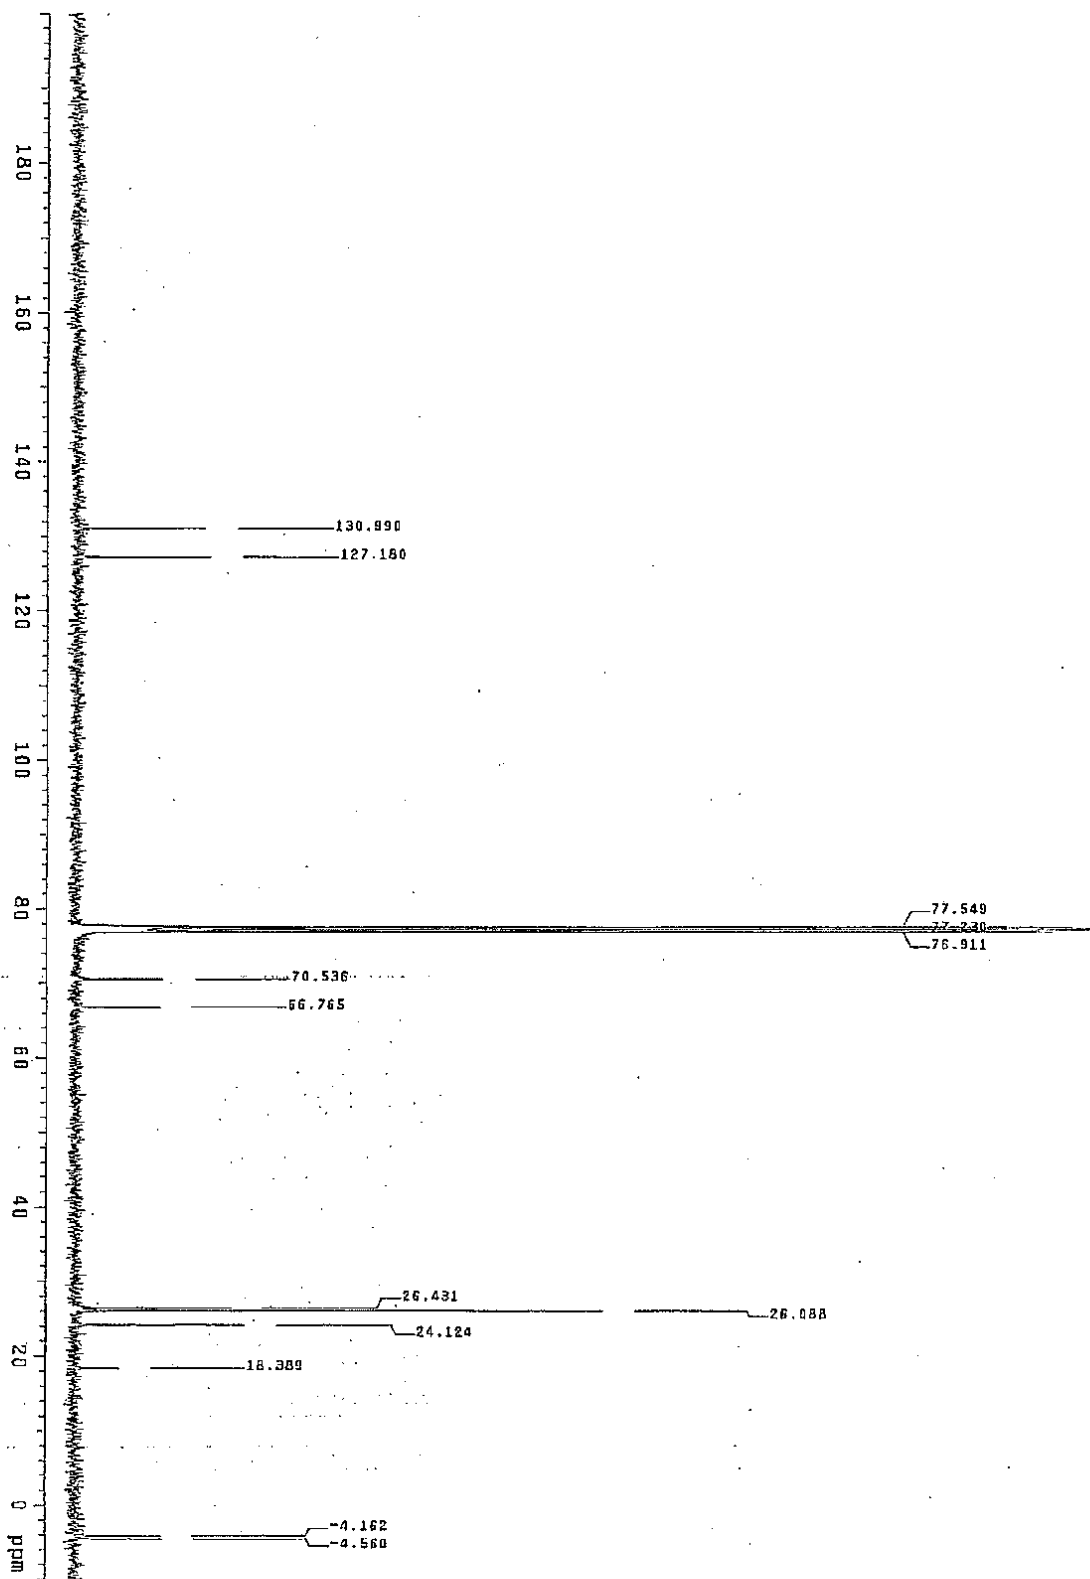

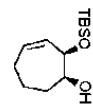

Table 1, entry 3, A

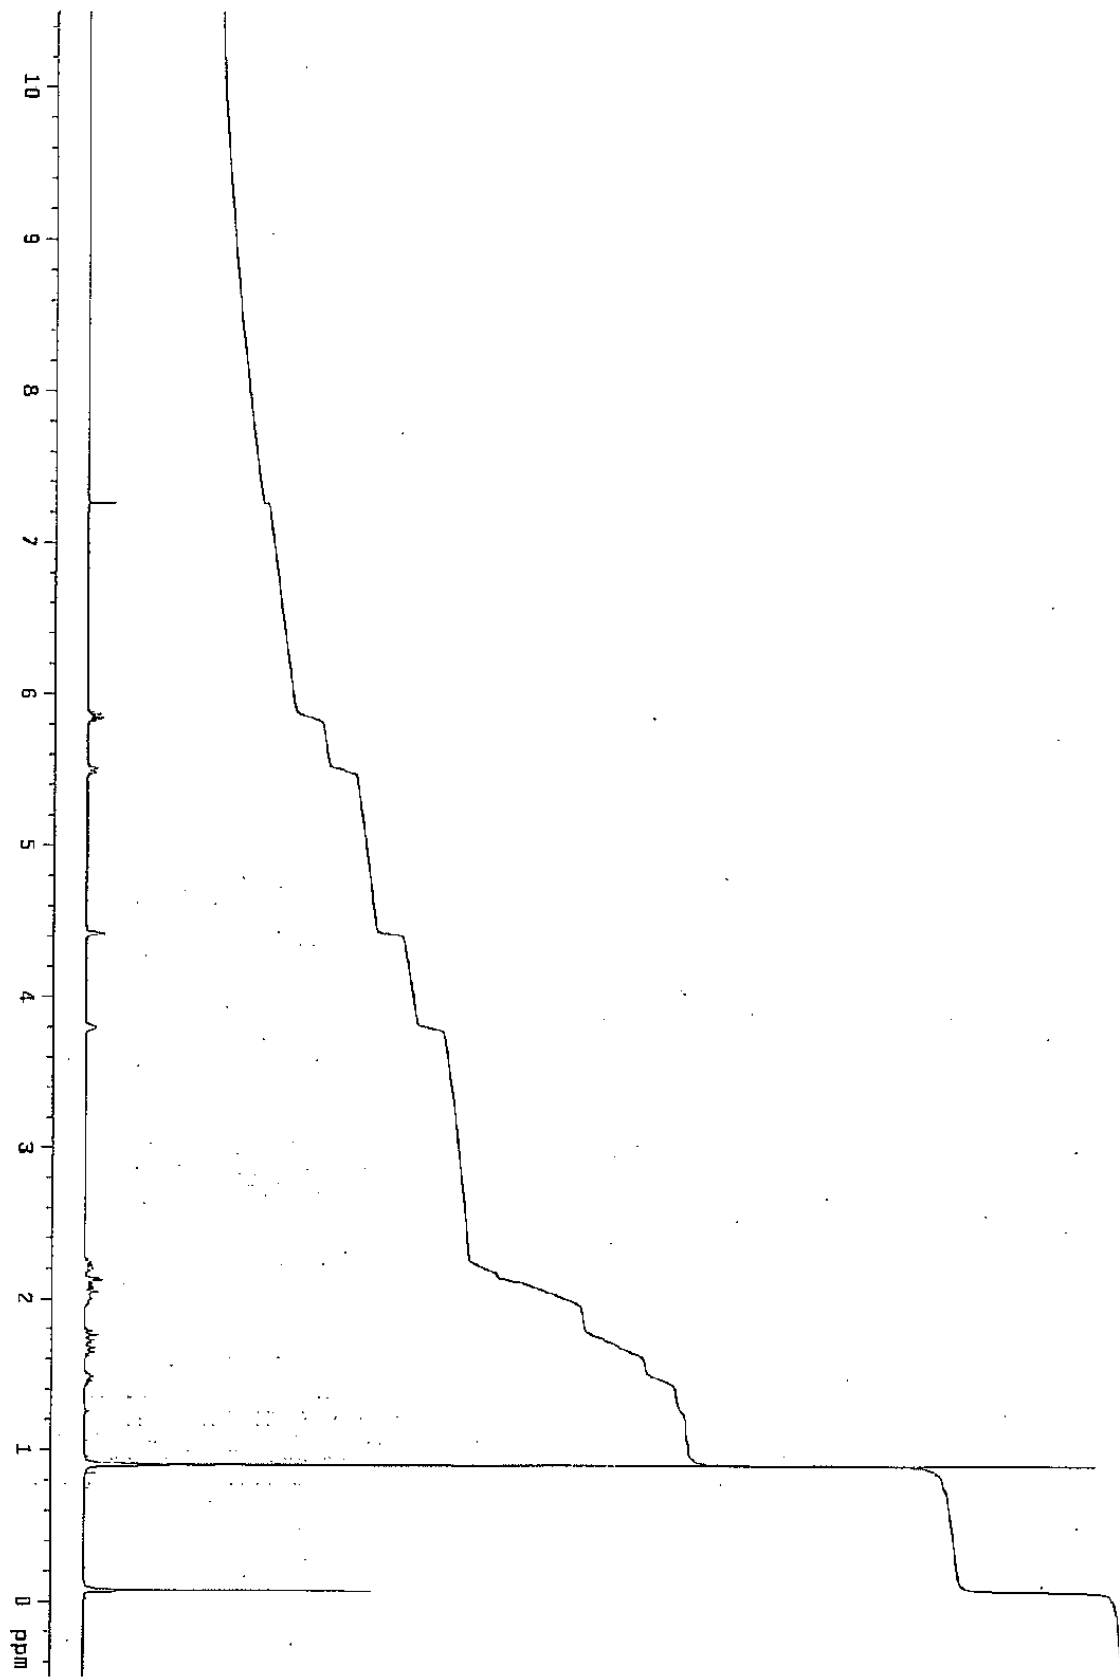

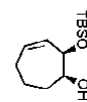

Table 1, entry 3, A

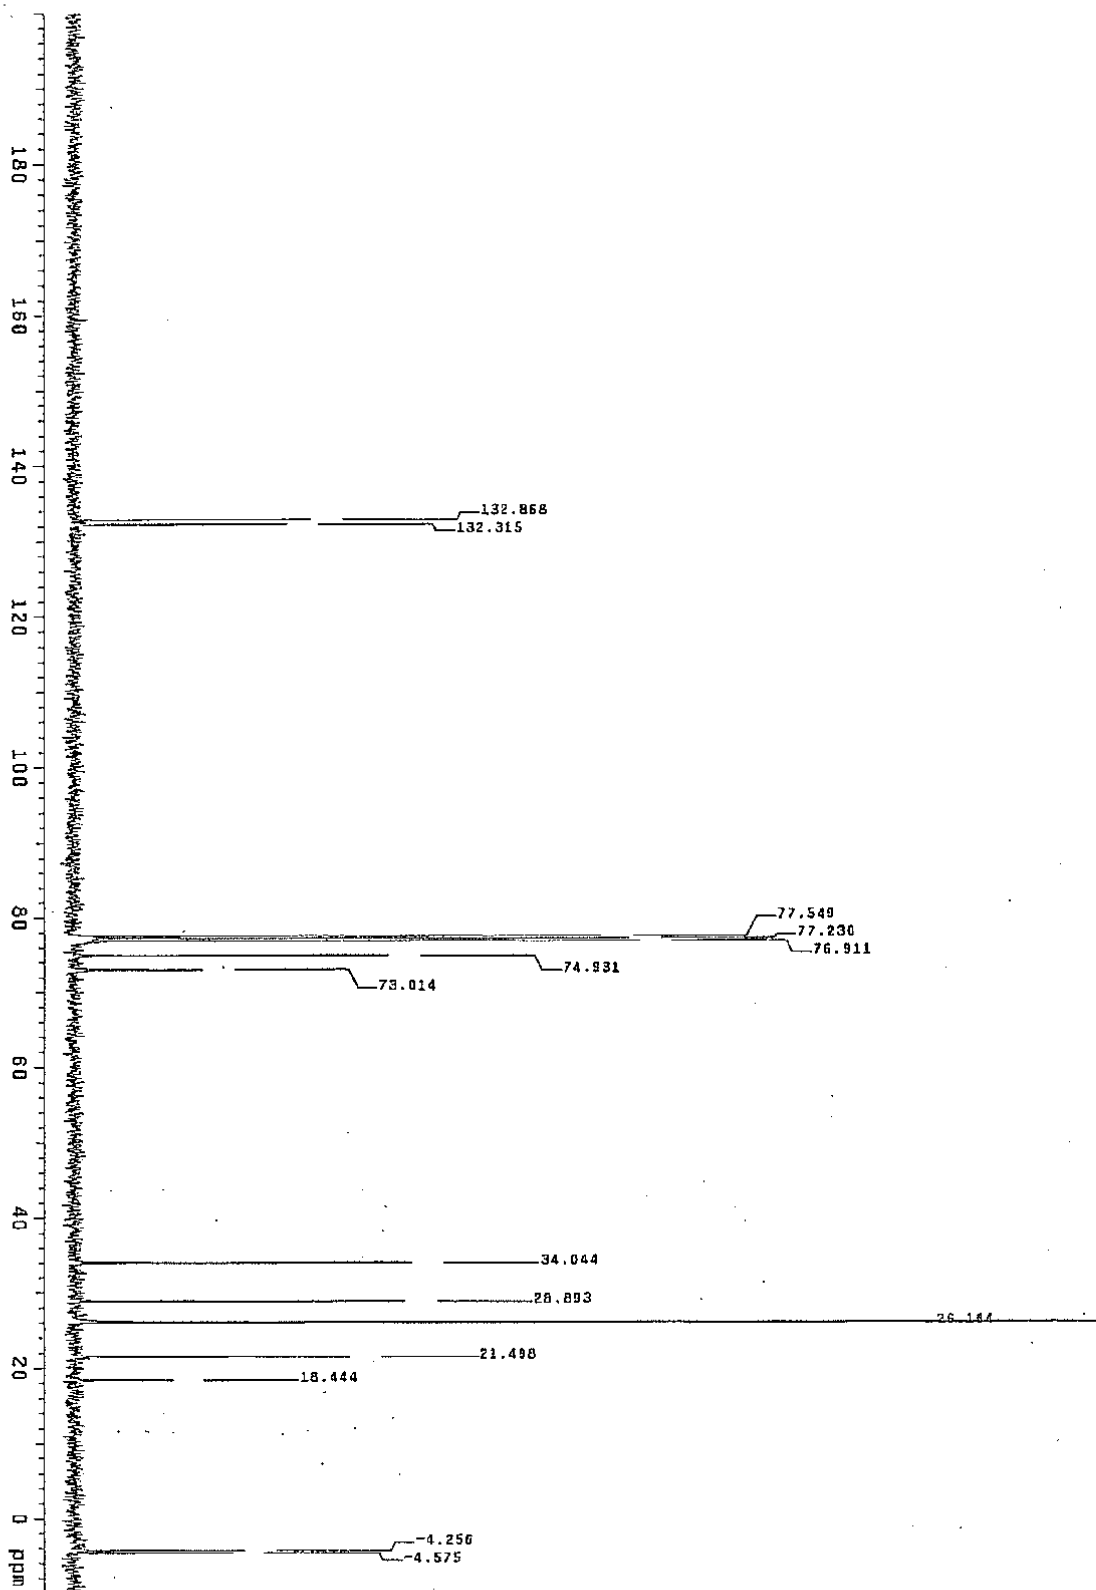

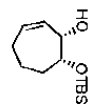

Table 1, entry 3, **B**

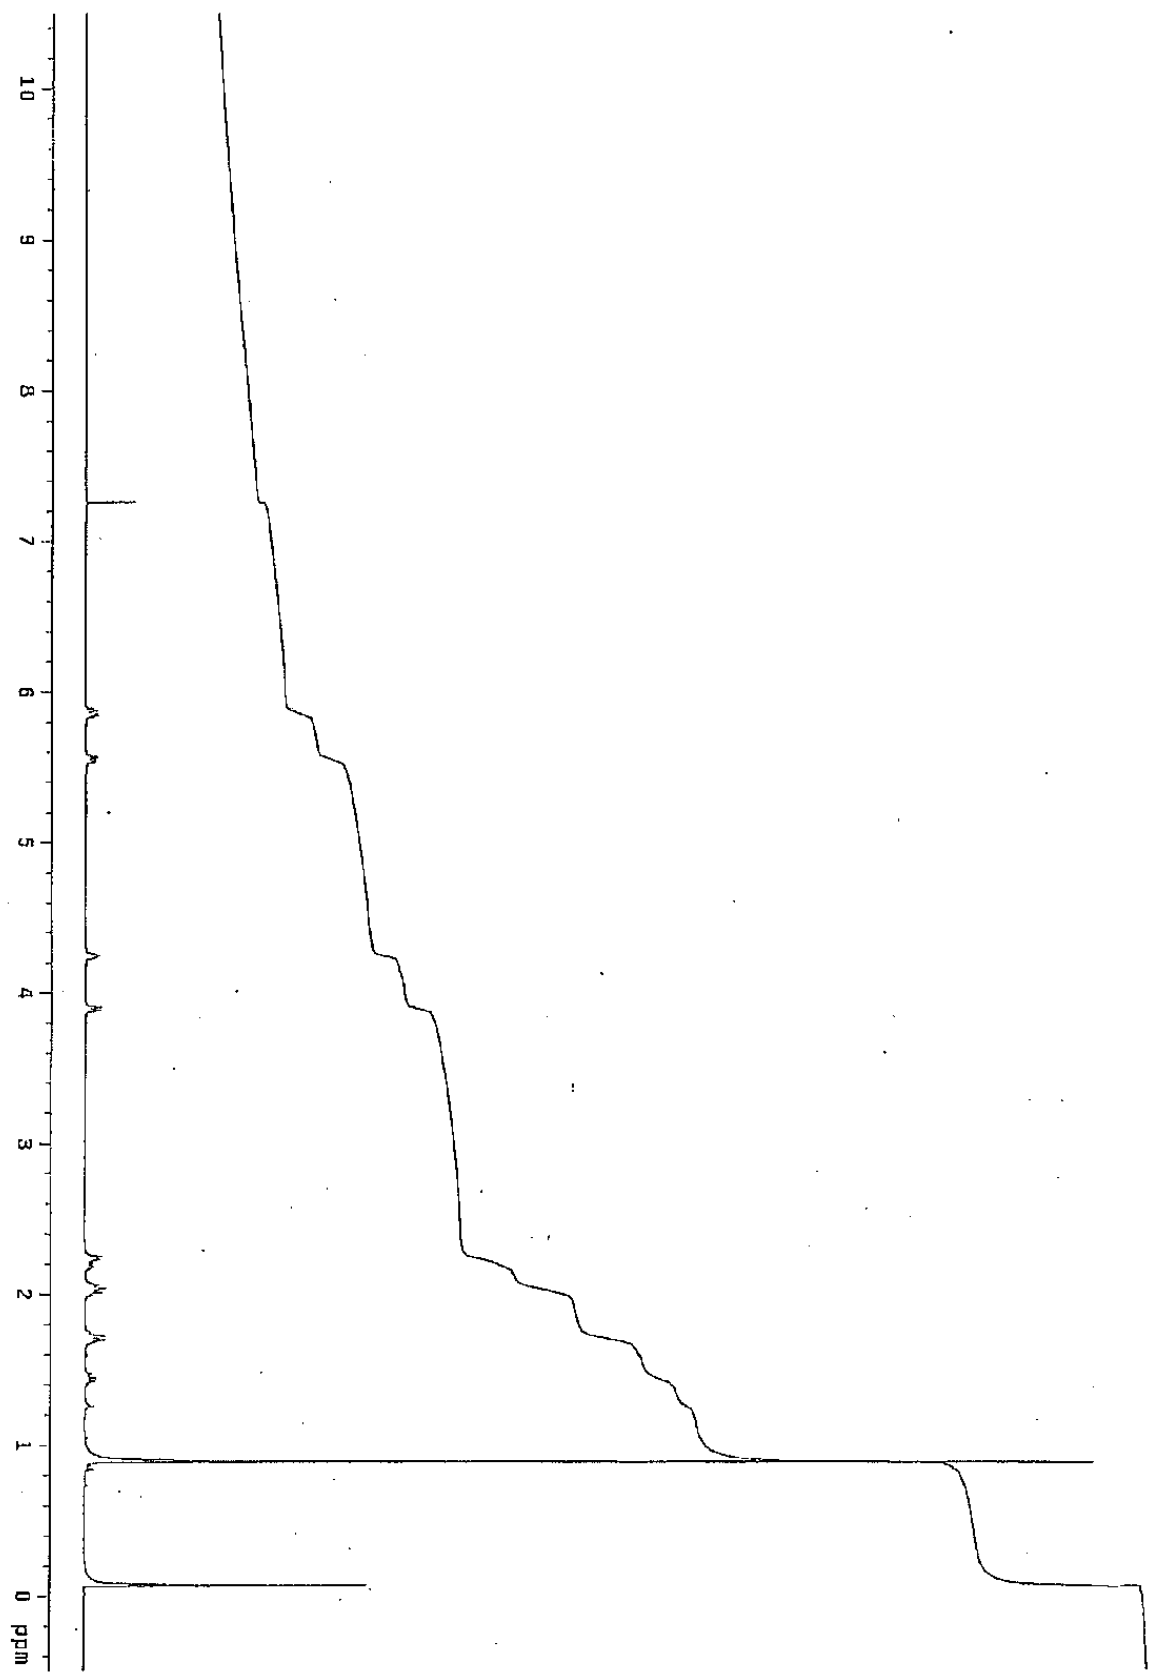

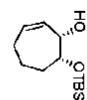

Table 1, entry 3, B

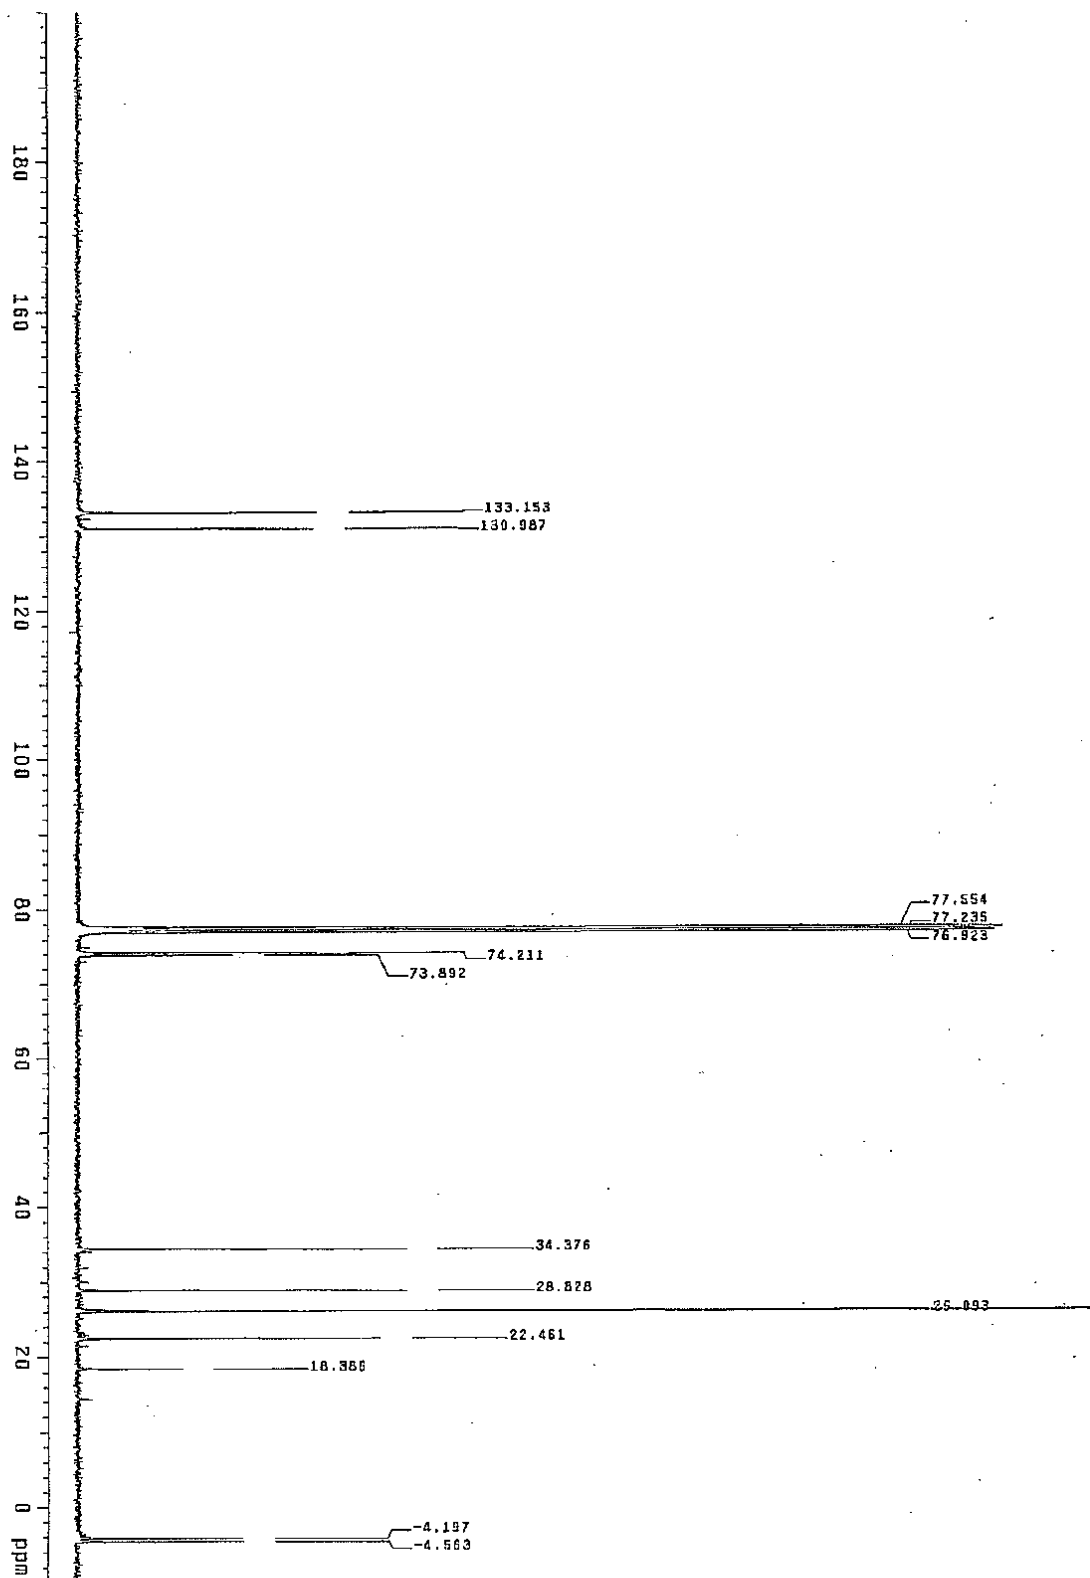

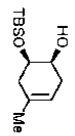

Table 1, entry 5, A

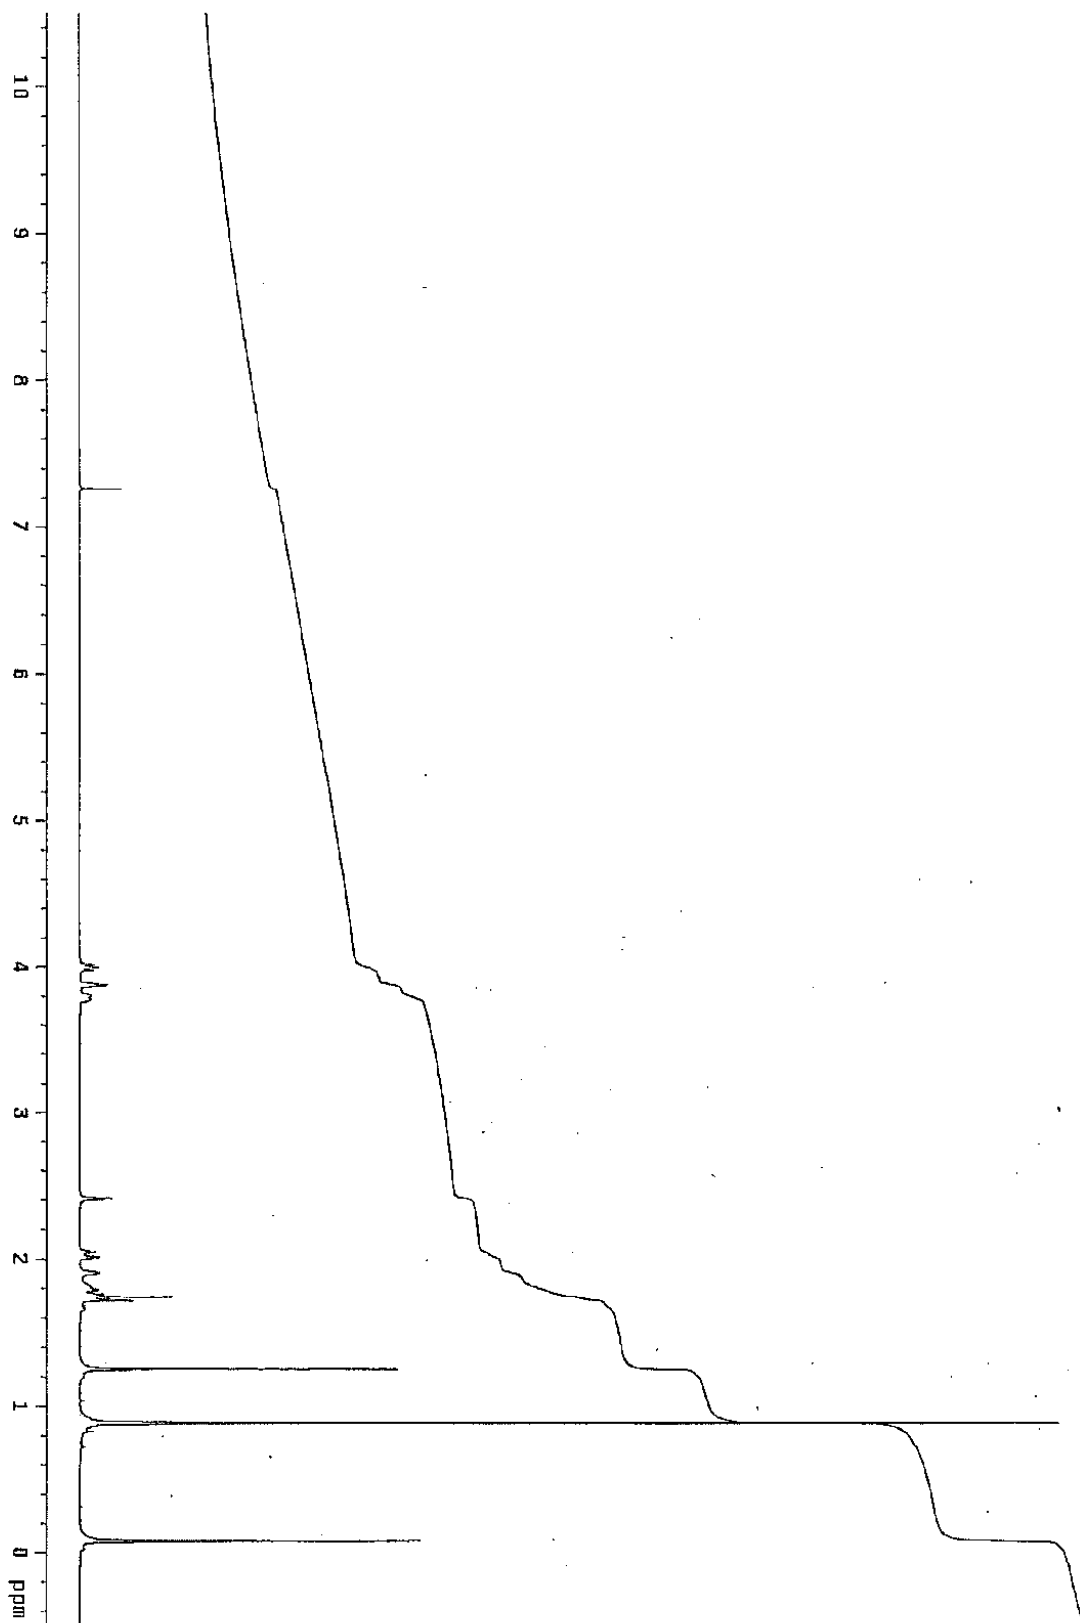



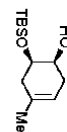

Table 1, entry 5, A

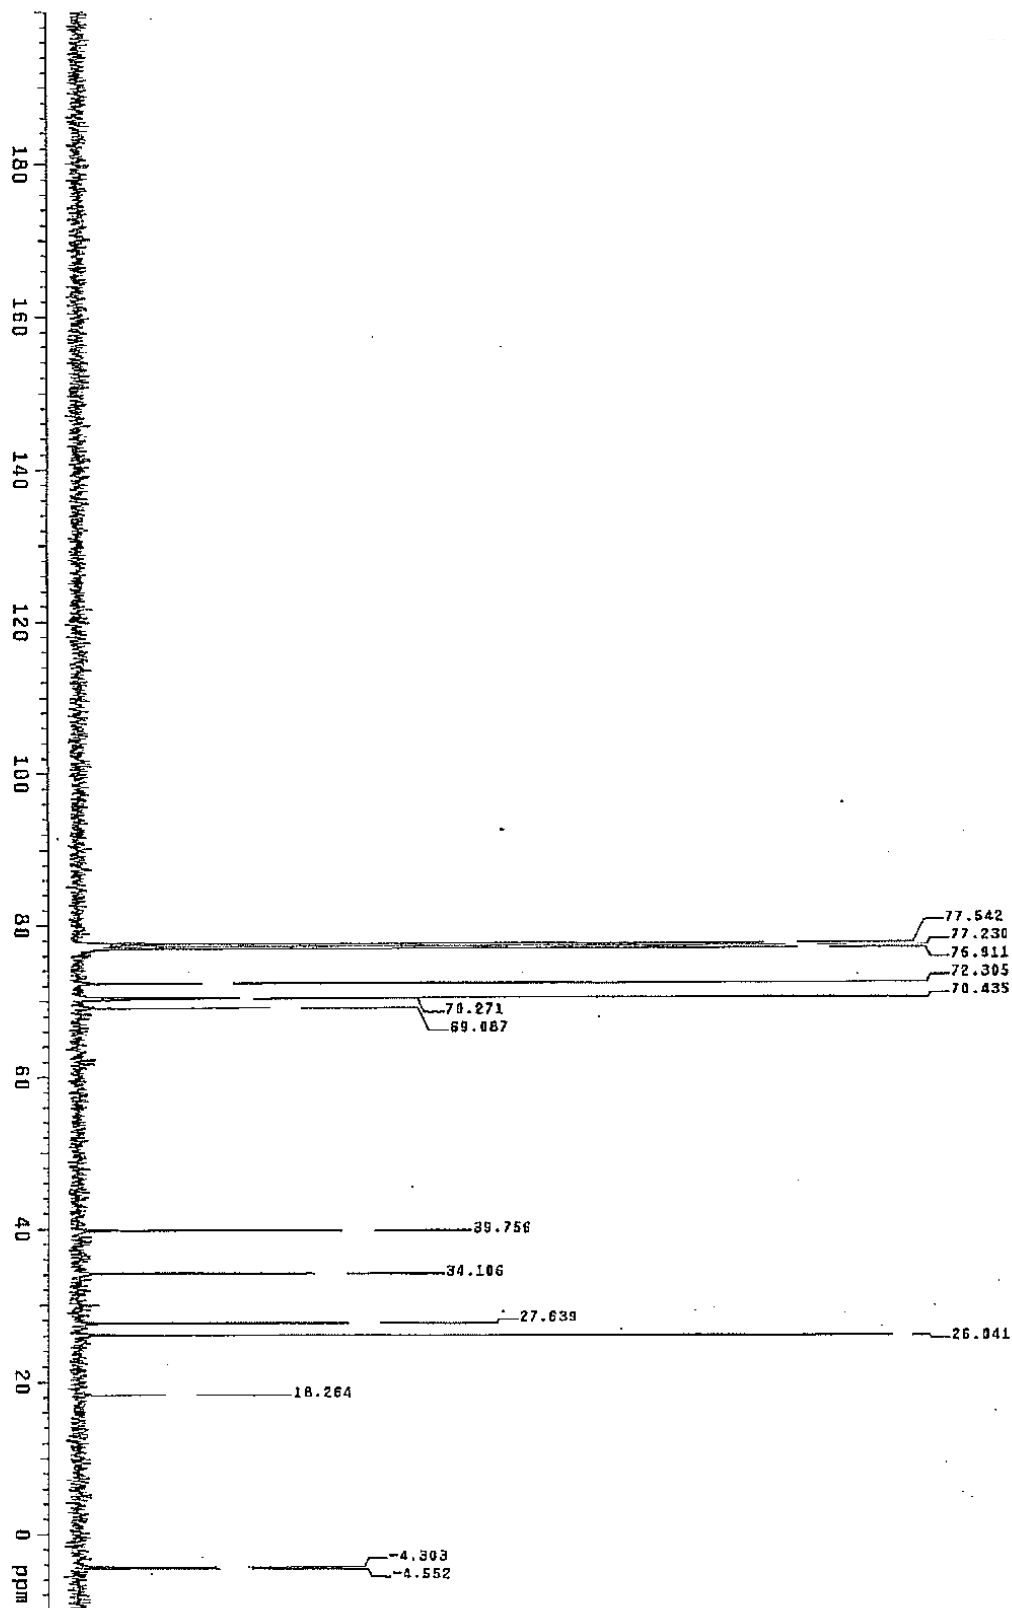

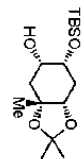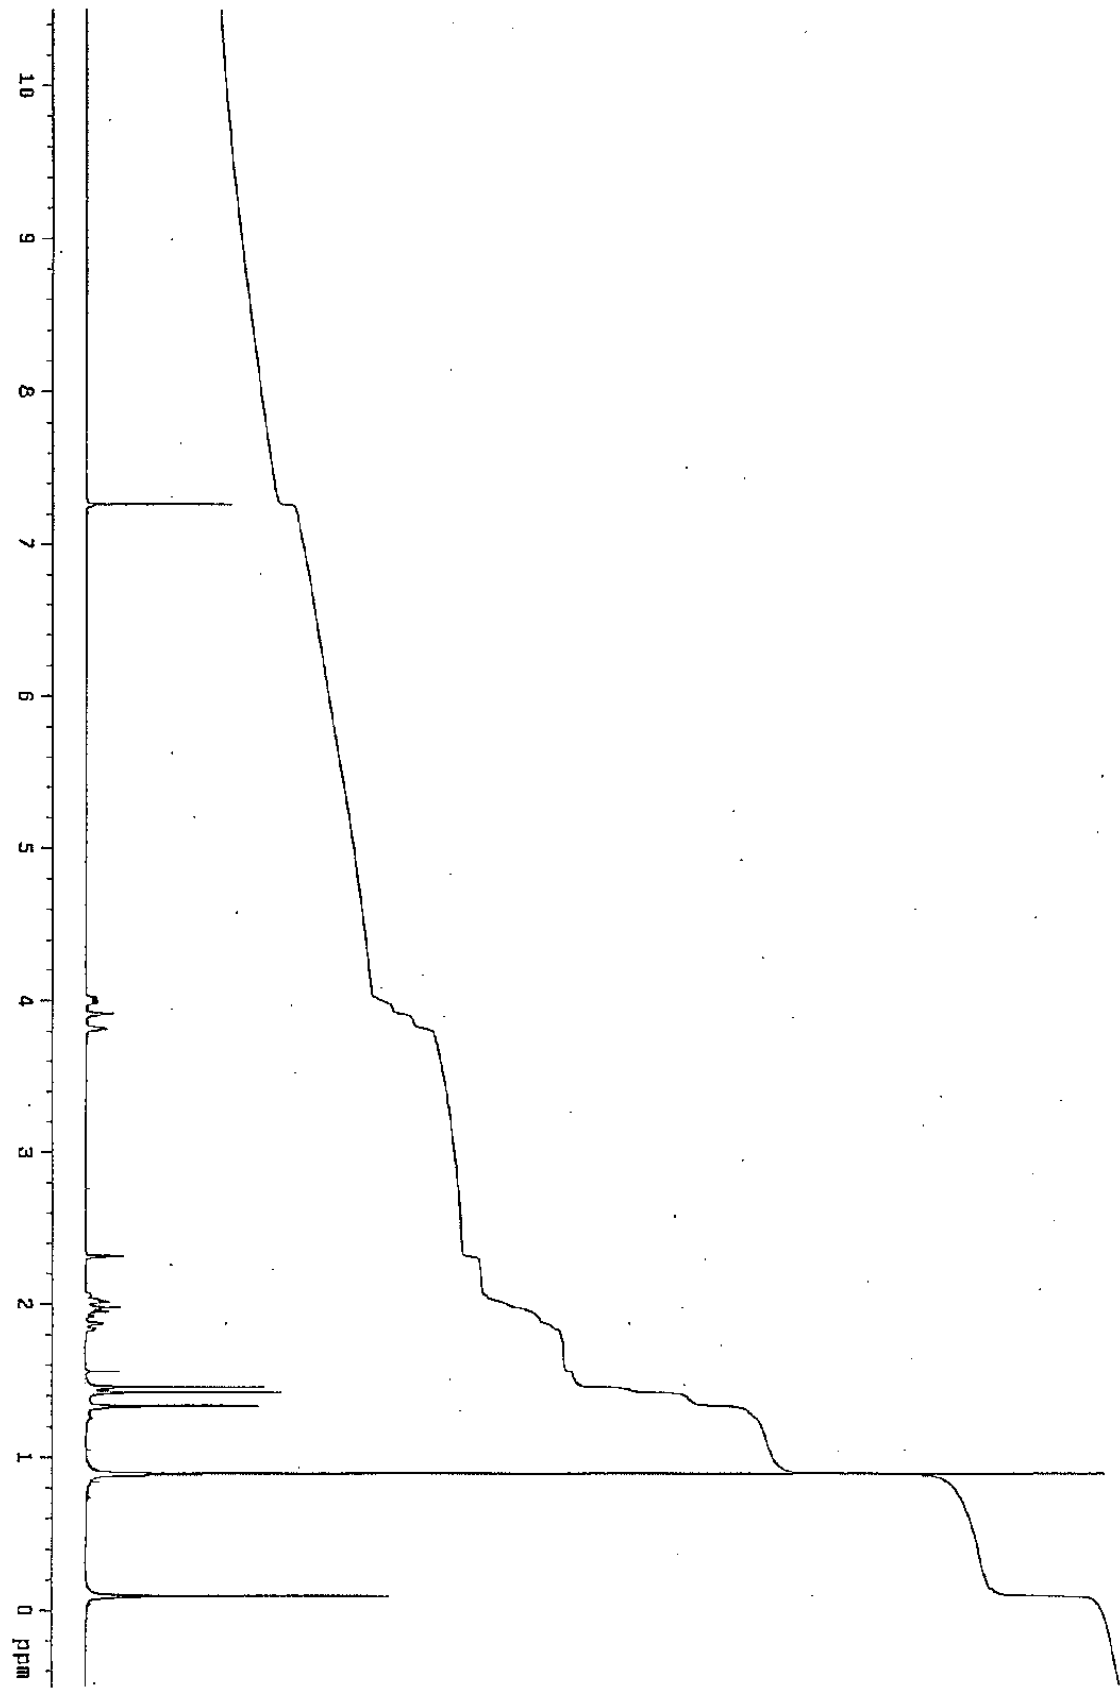

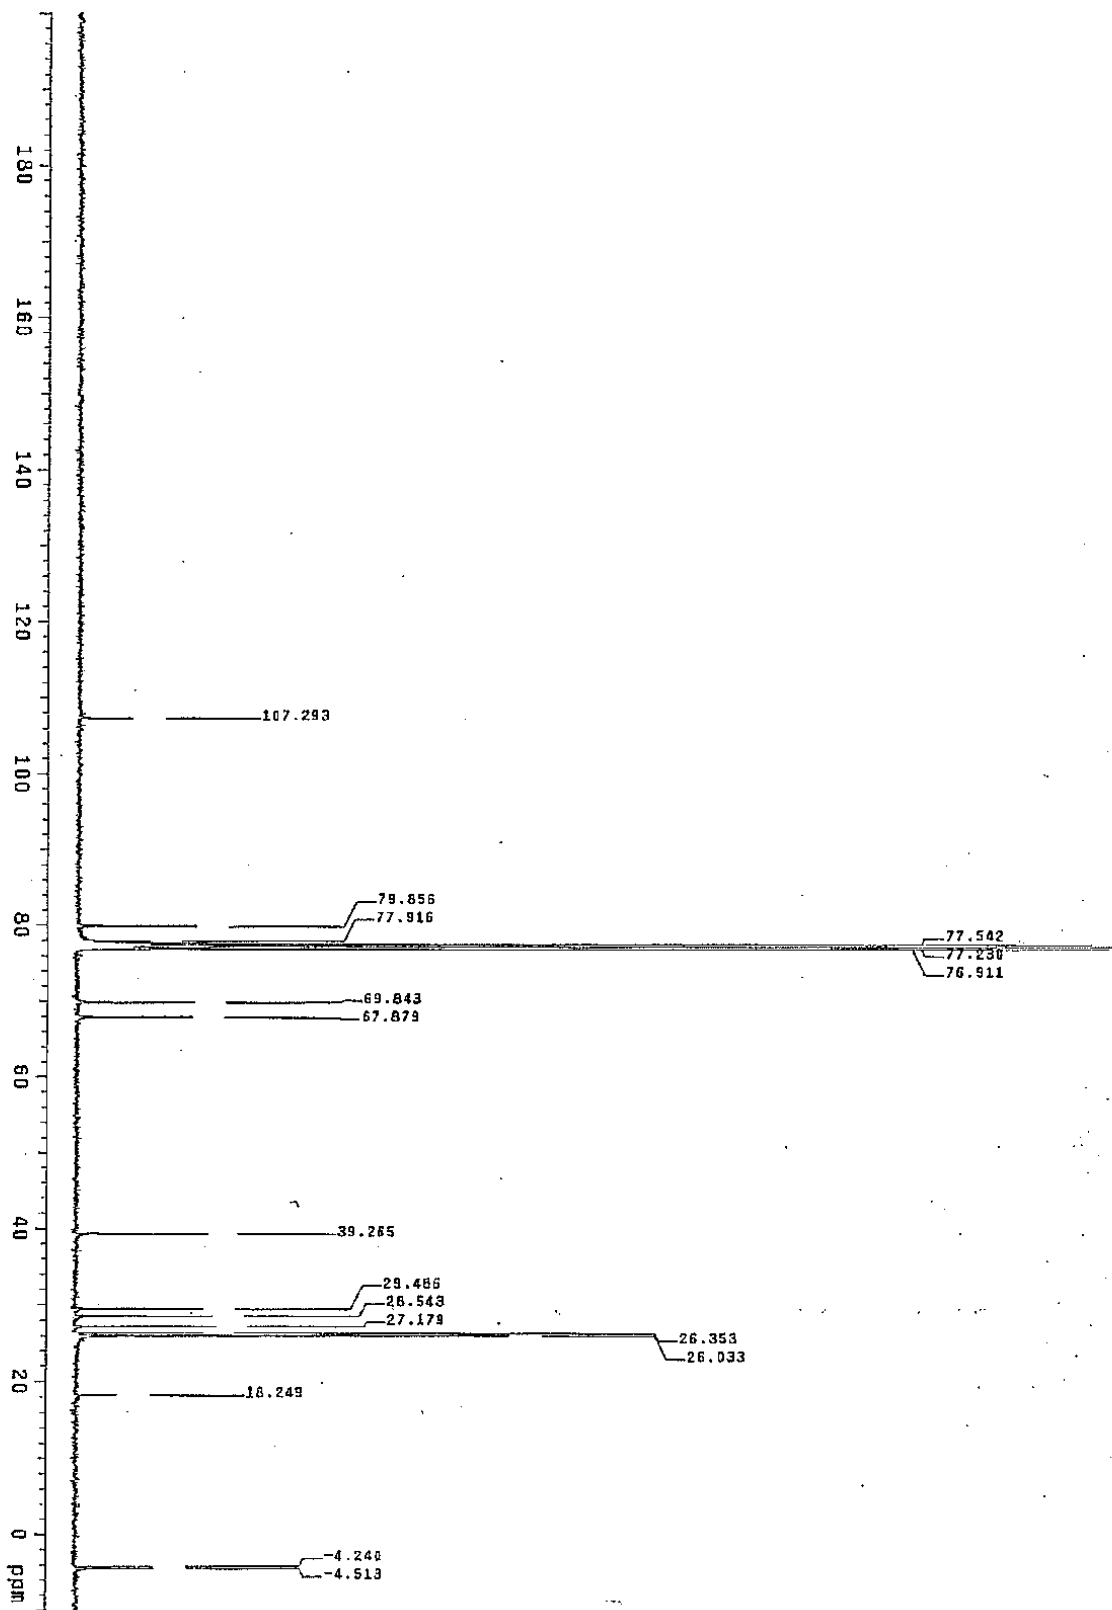

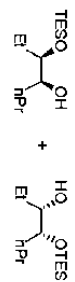

Table 1, entry 4, **A & B**

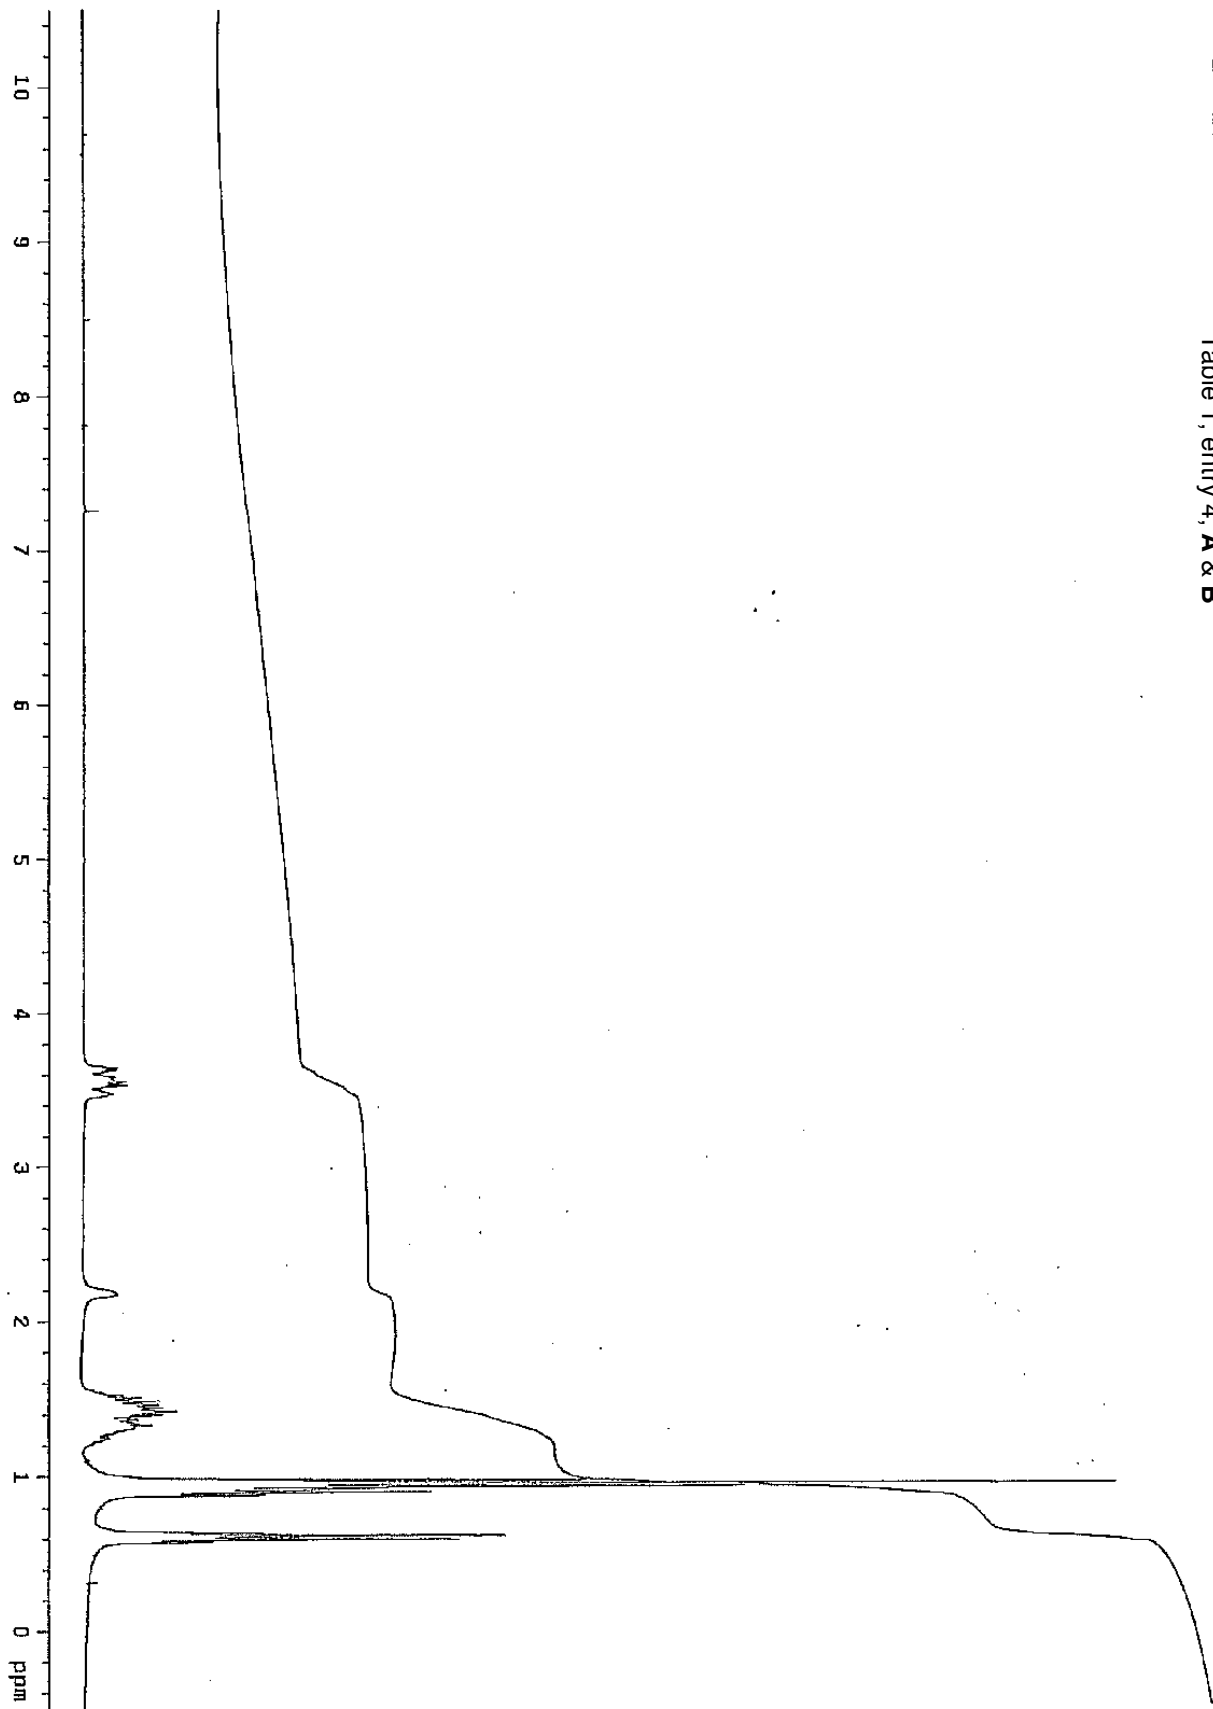

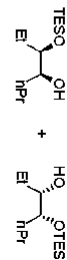

Table 1, entry 4, A & B

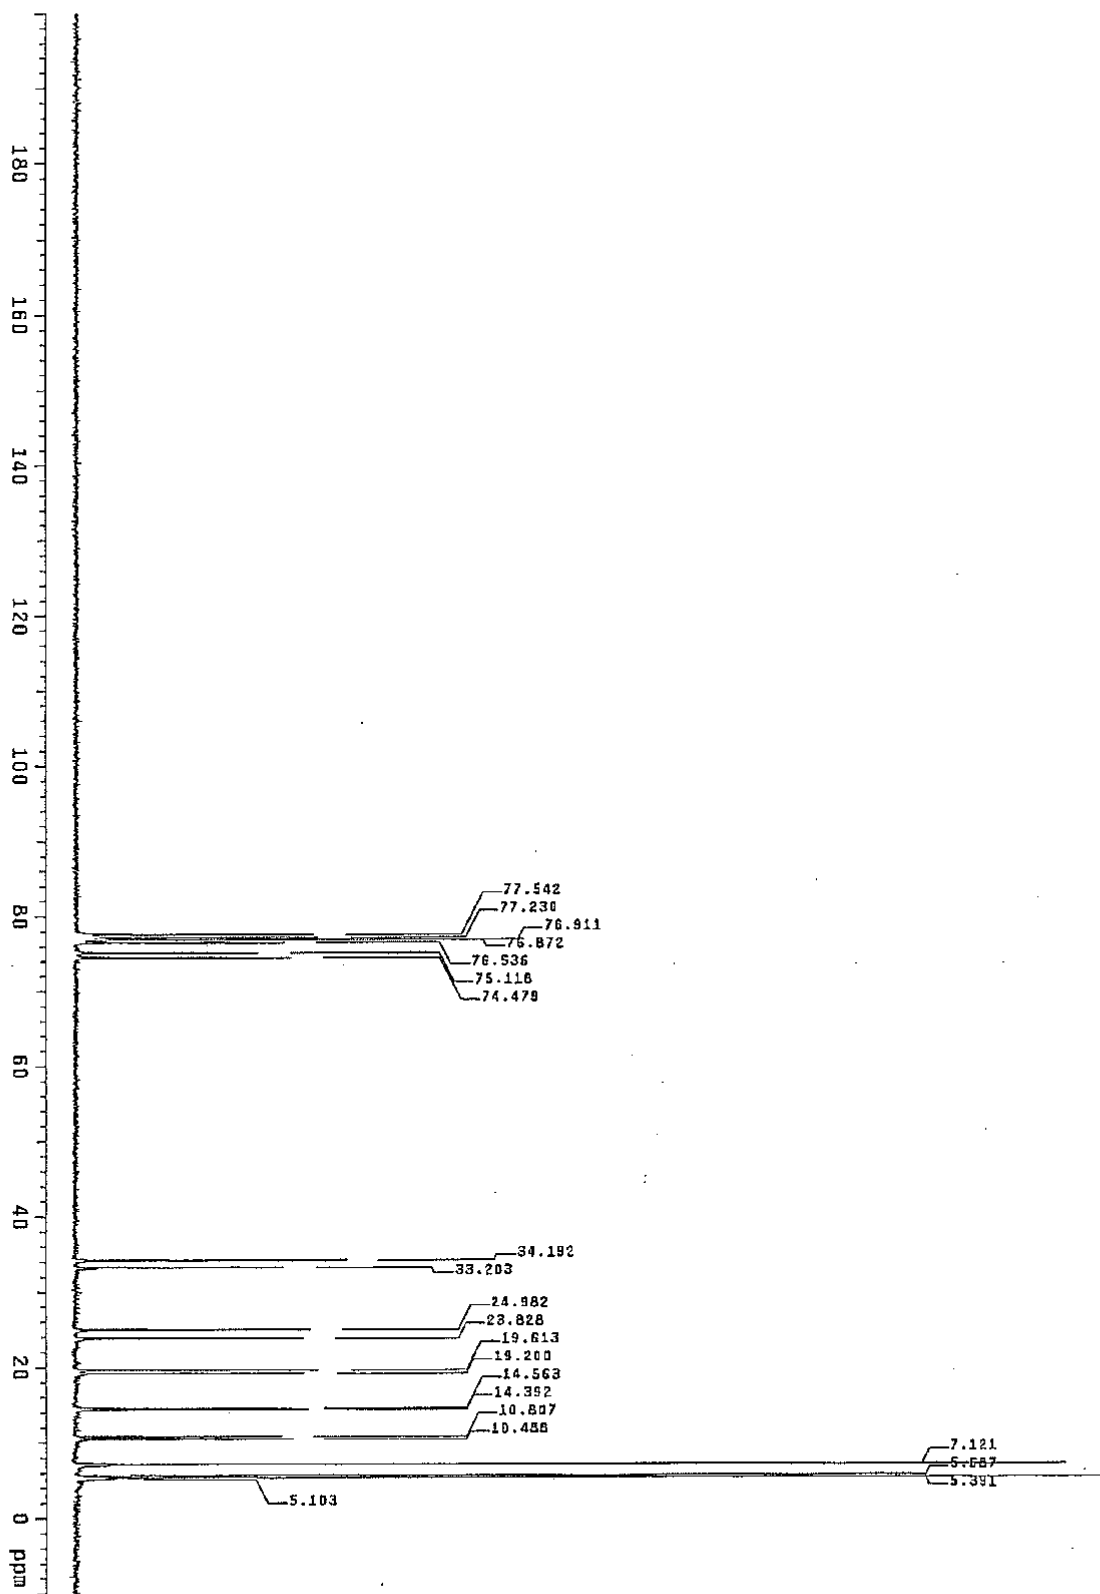

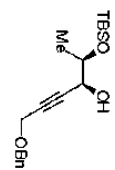

Table 1, entry 6, A

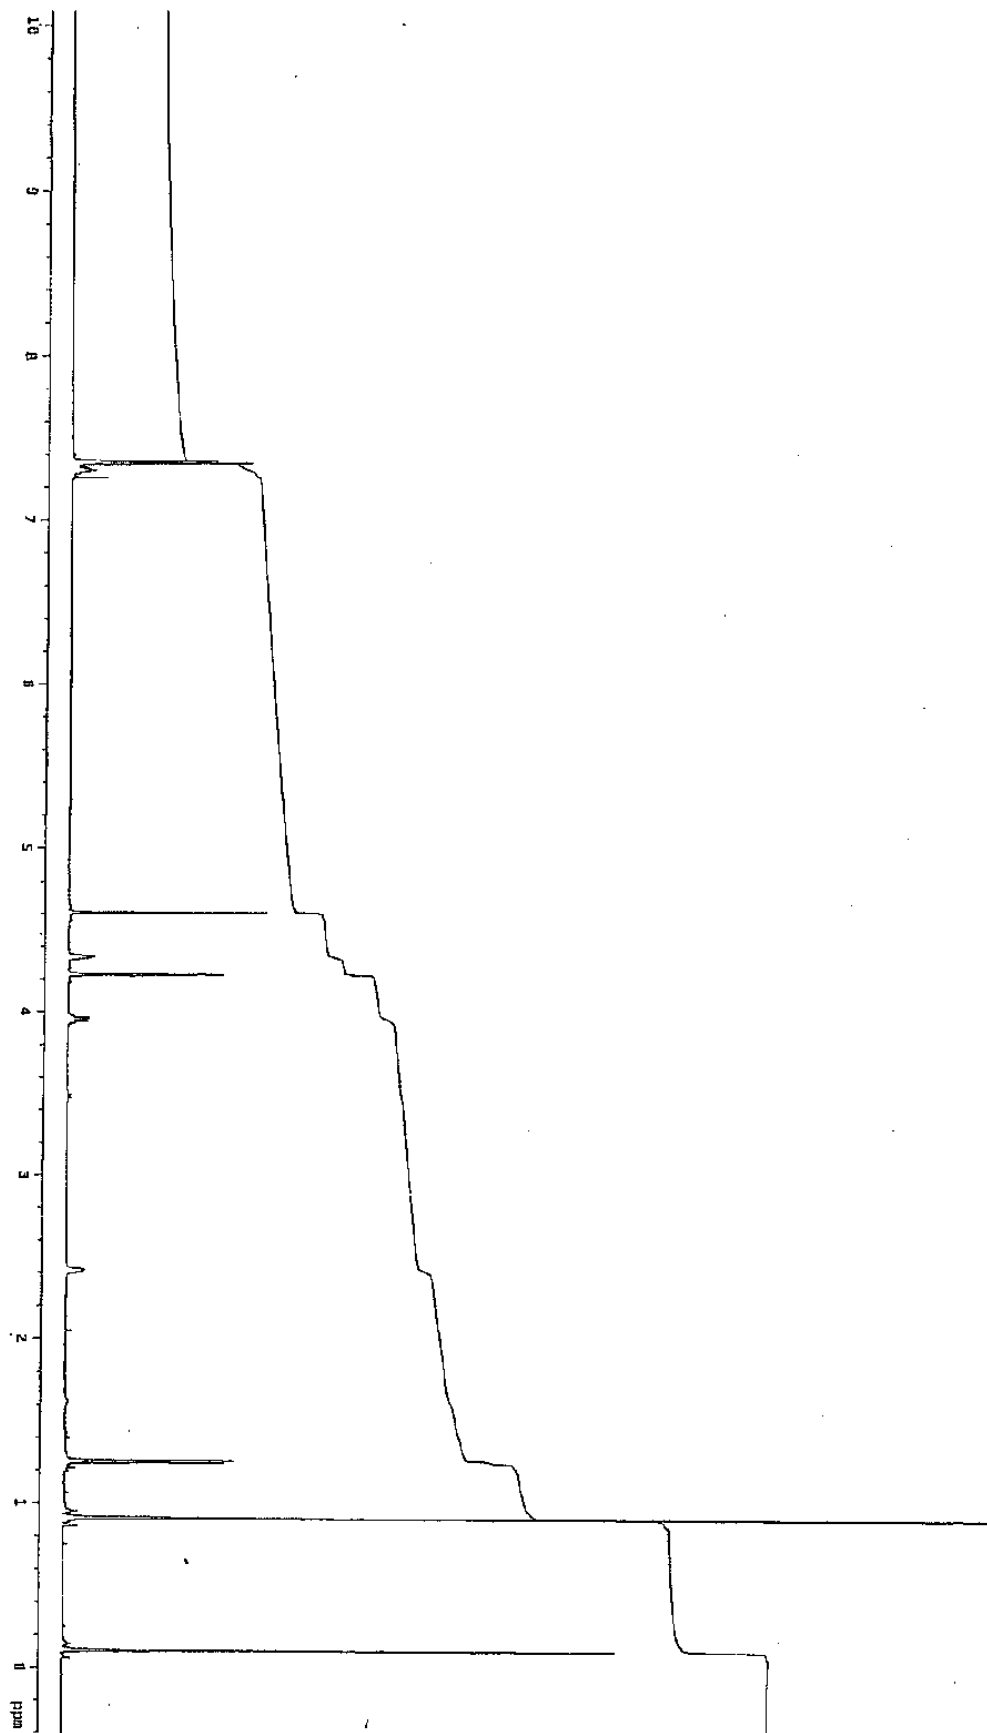

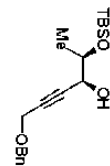

Table 1, entry 6, A

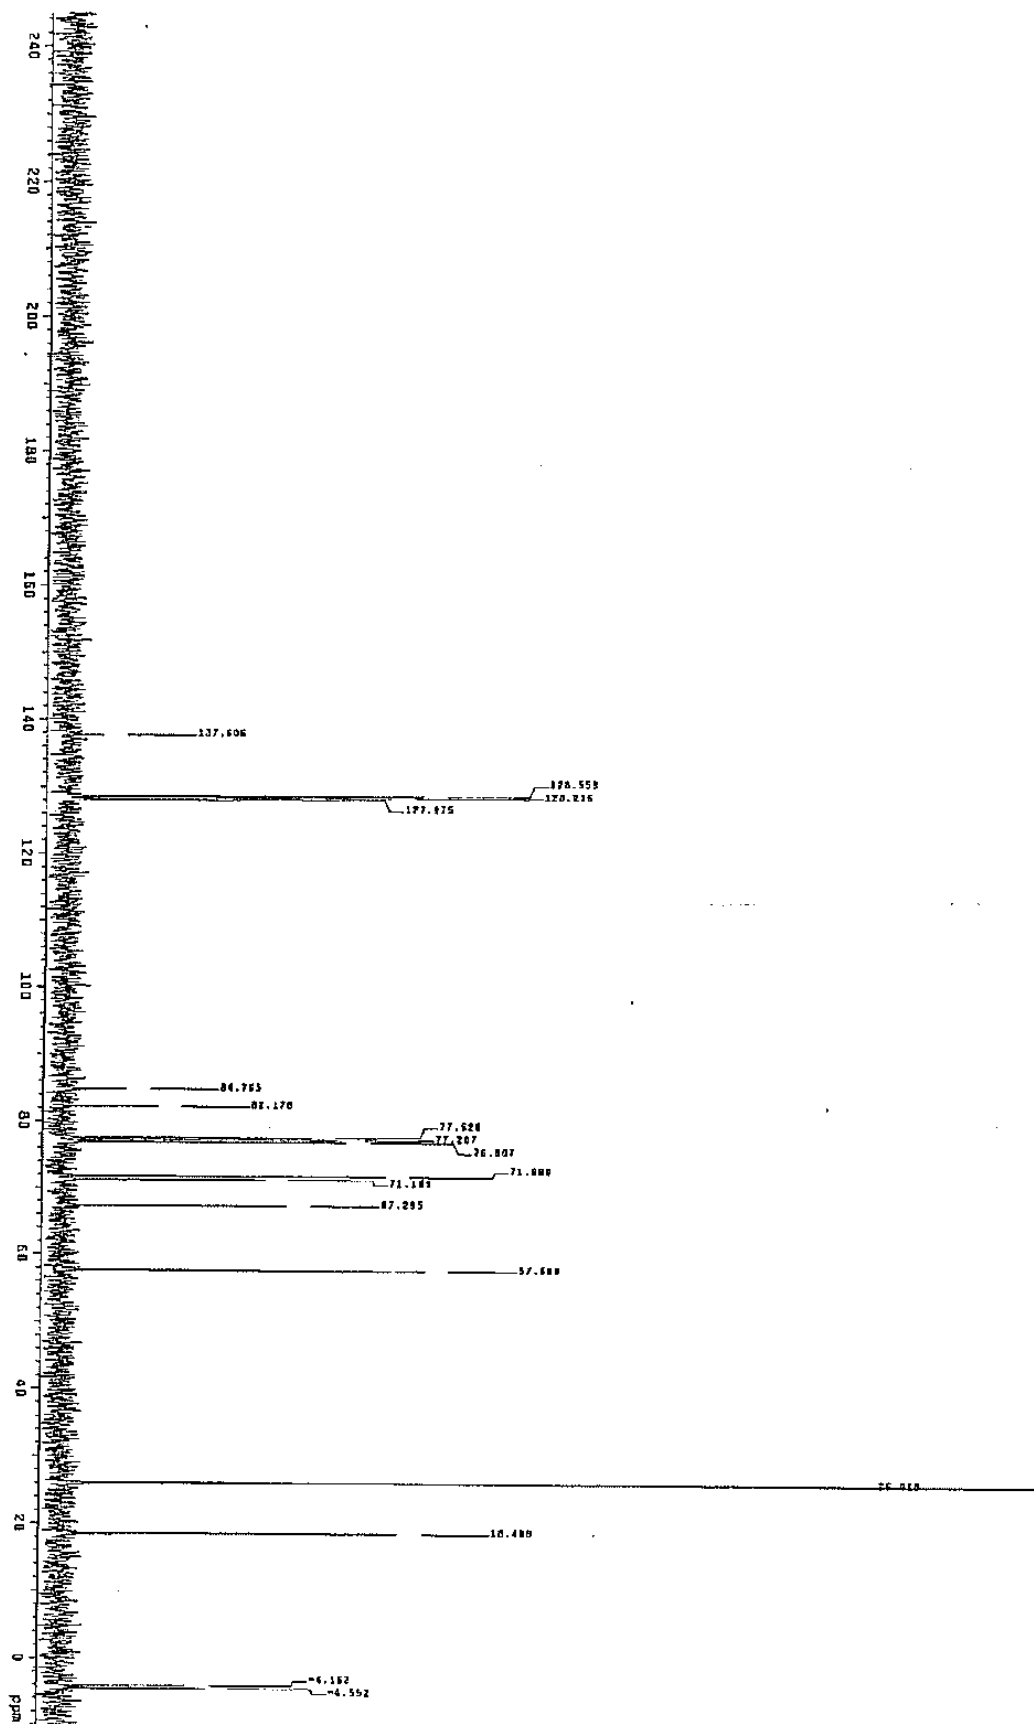

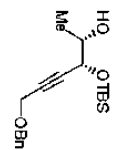

Table 1, entry 6, **B**

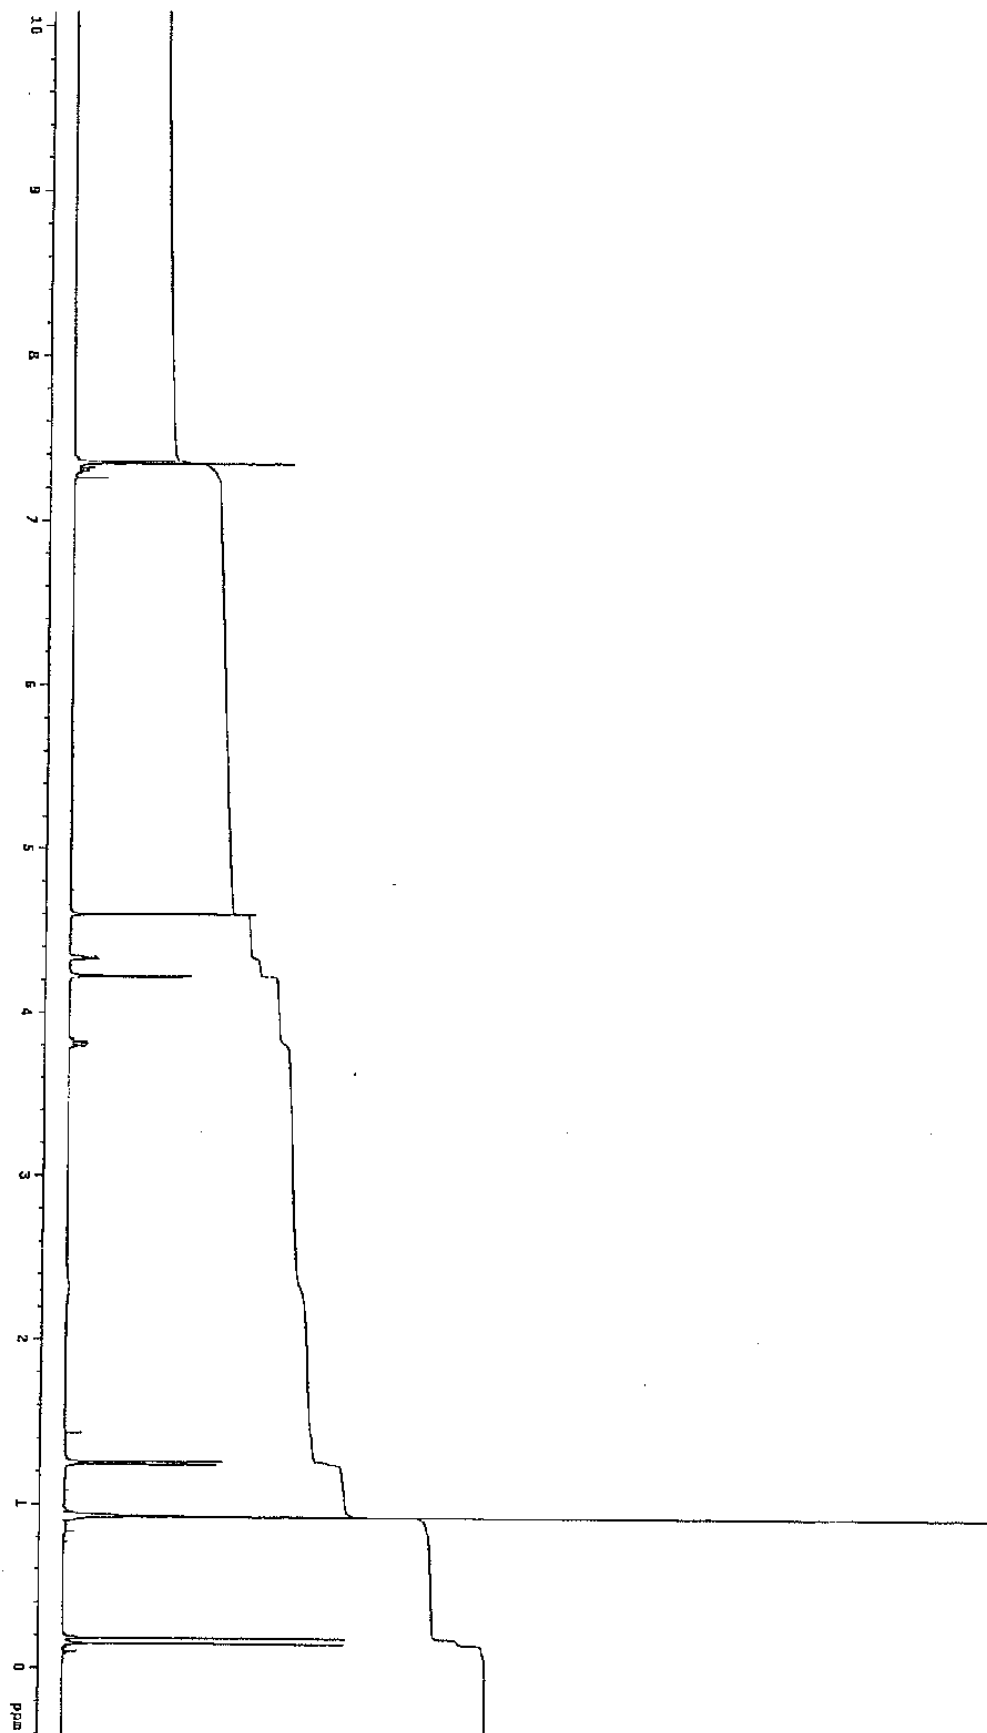



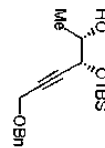

Table 1, entry 6, B

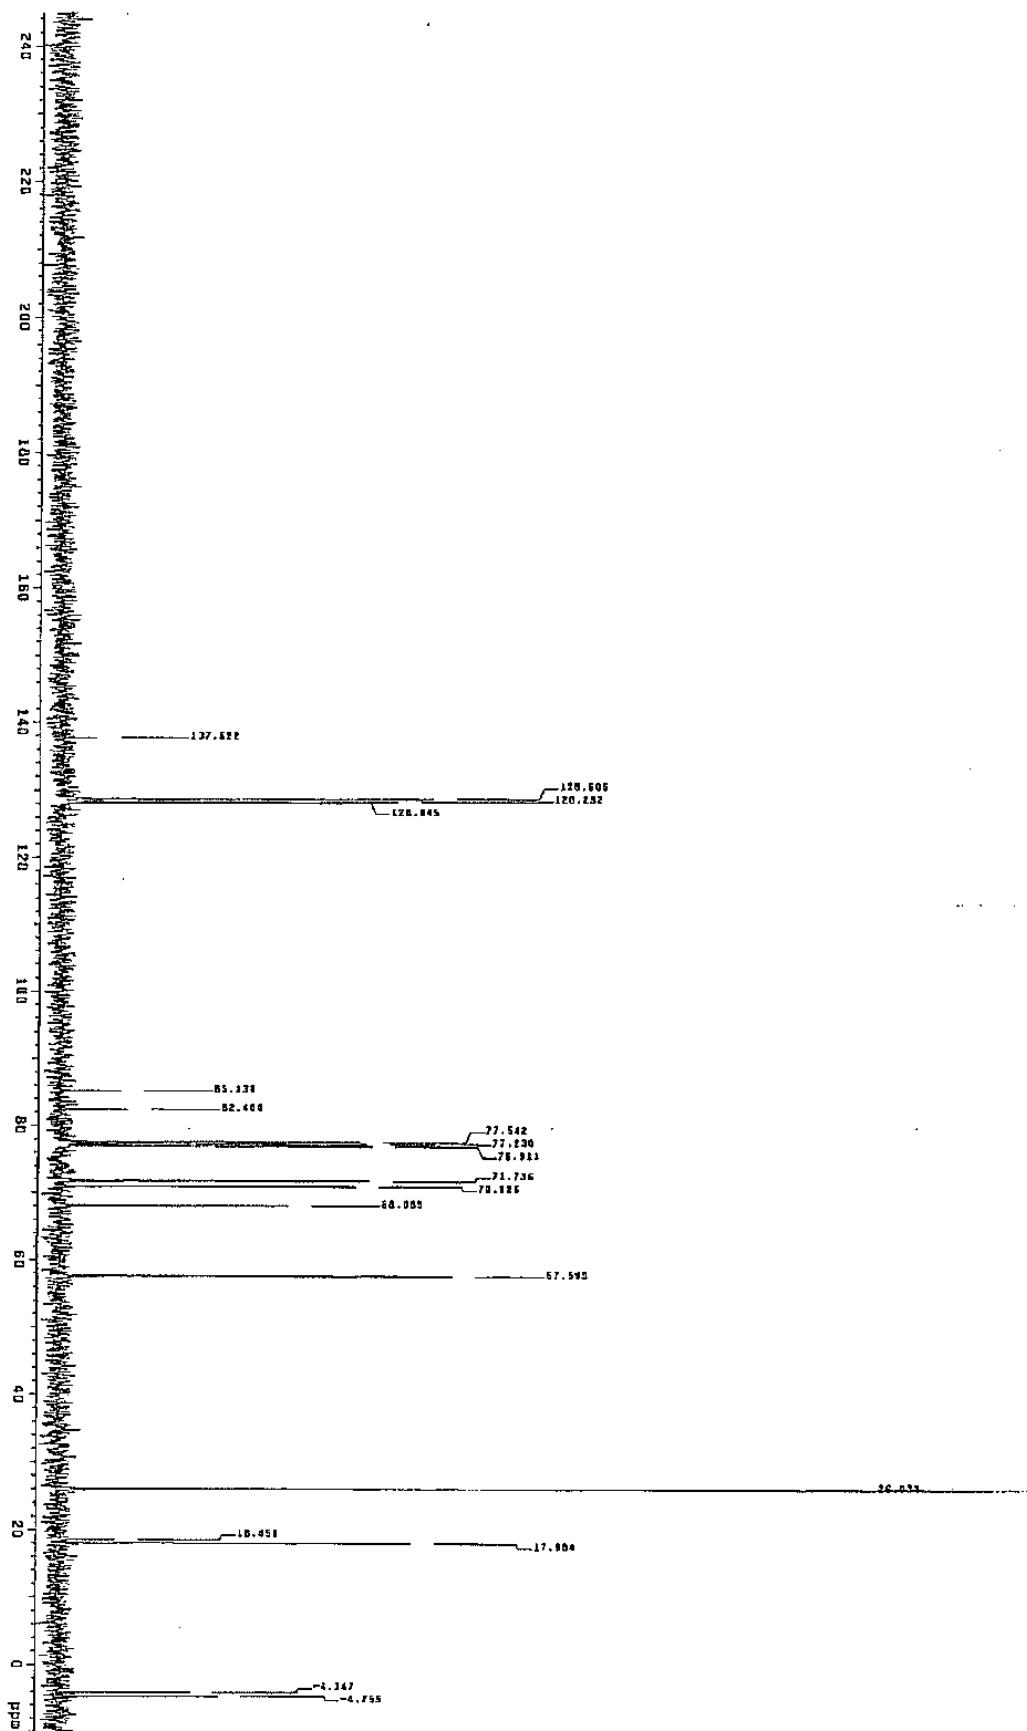

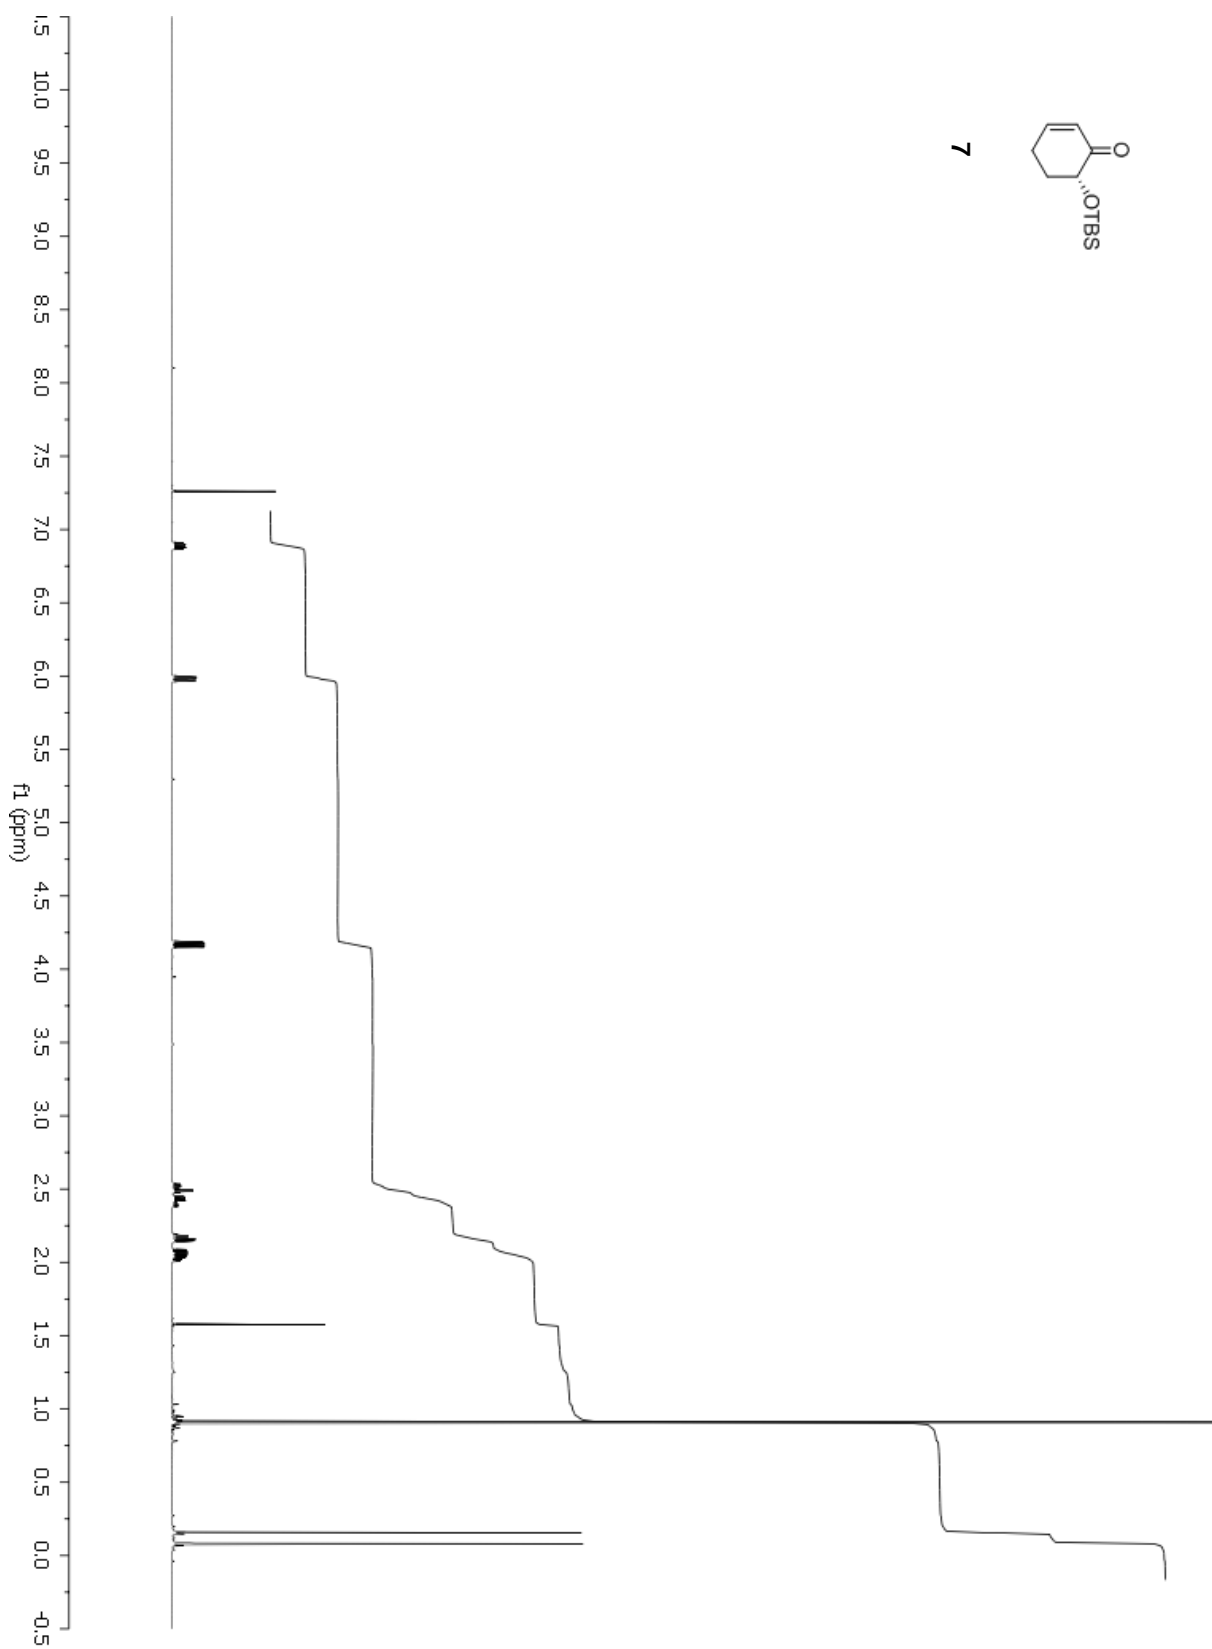

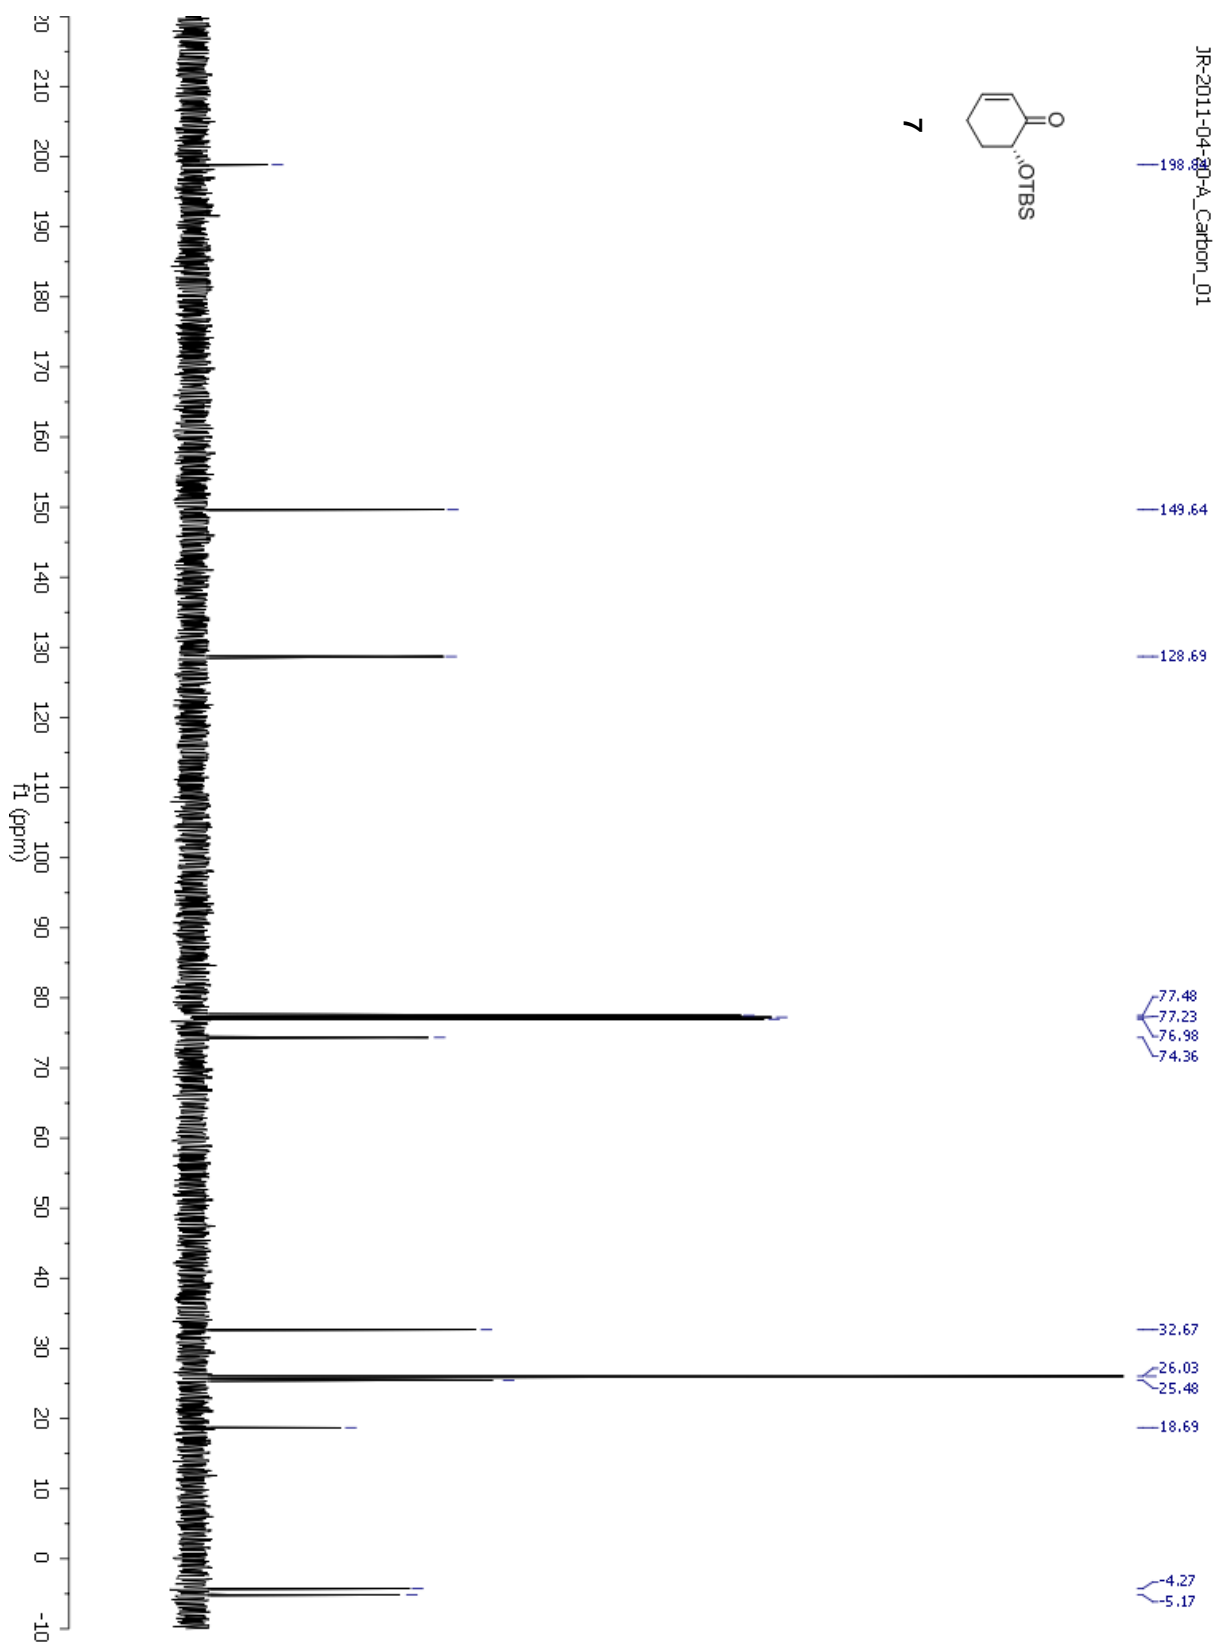

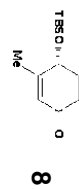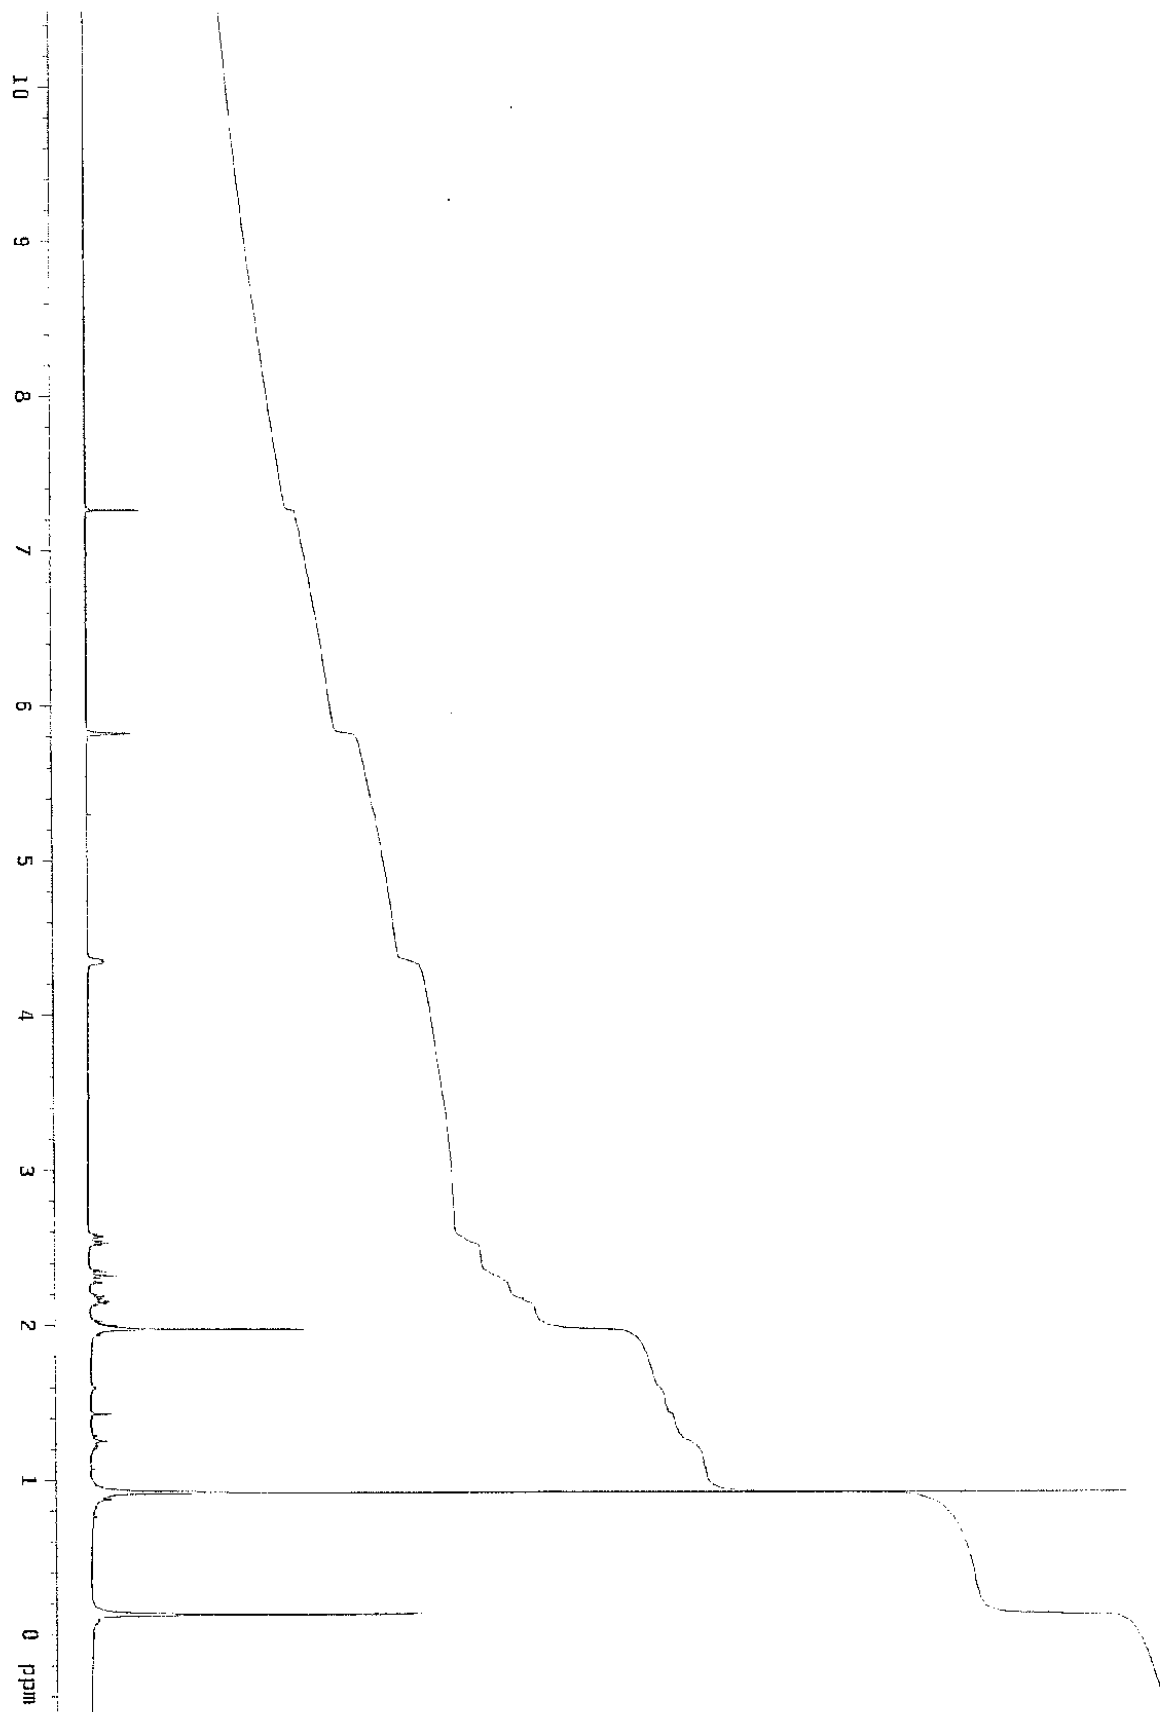

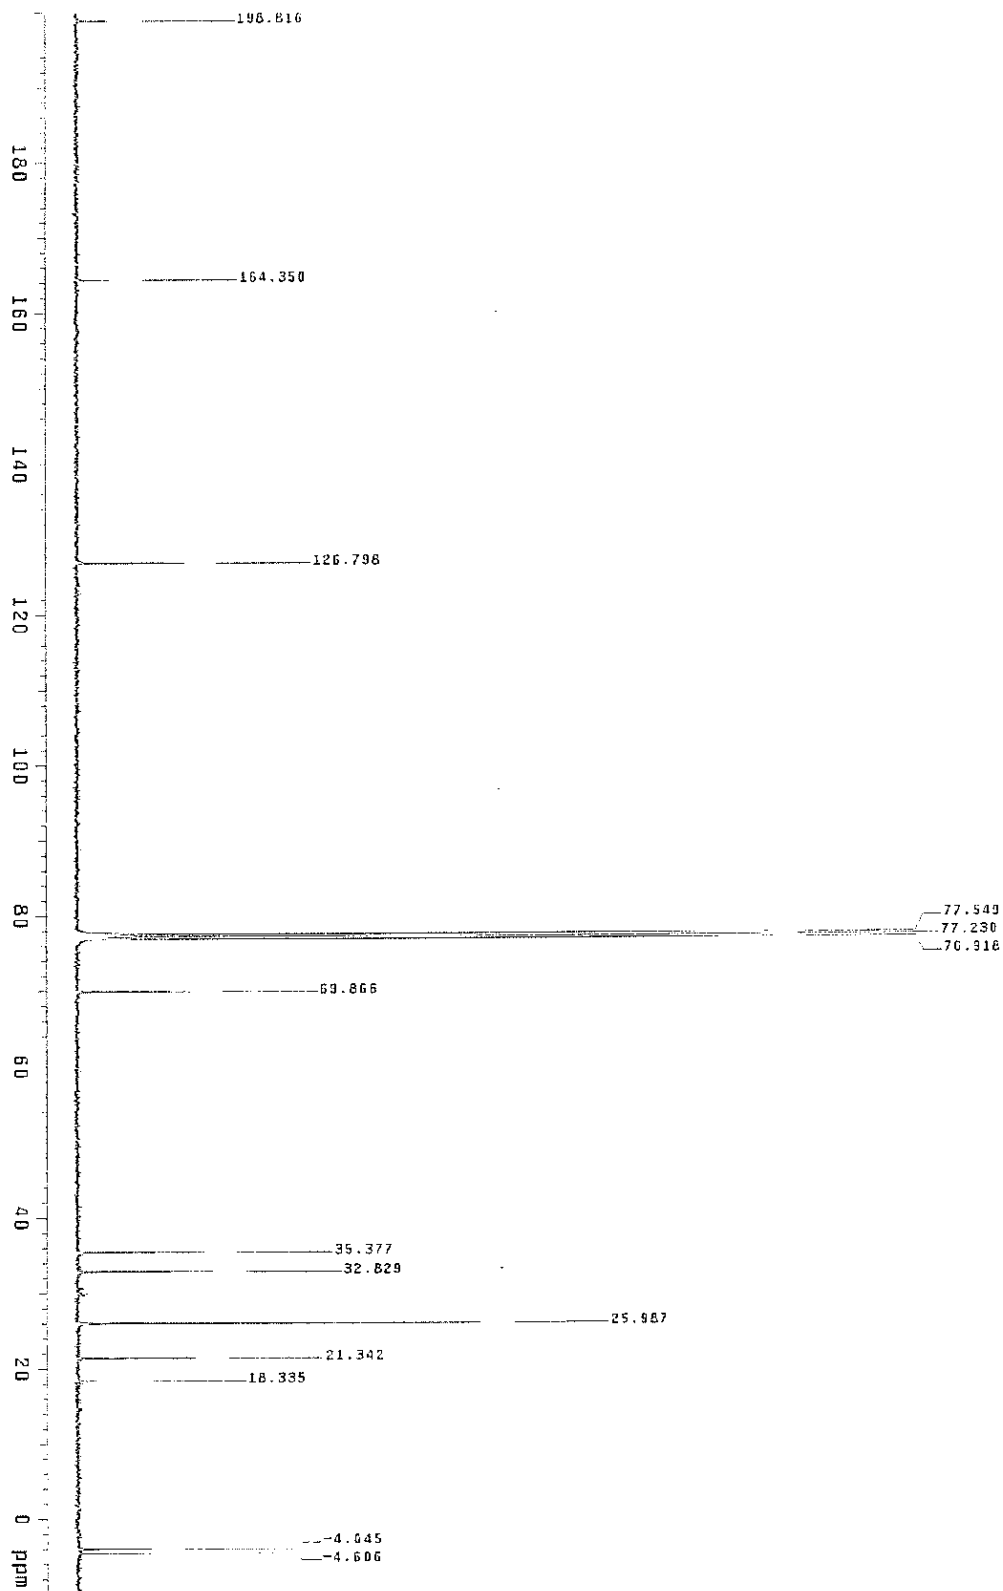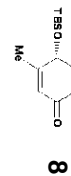

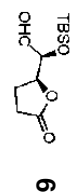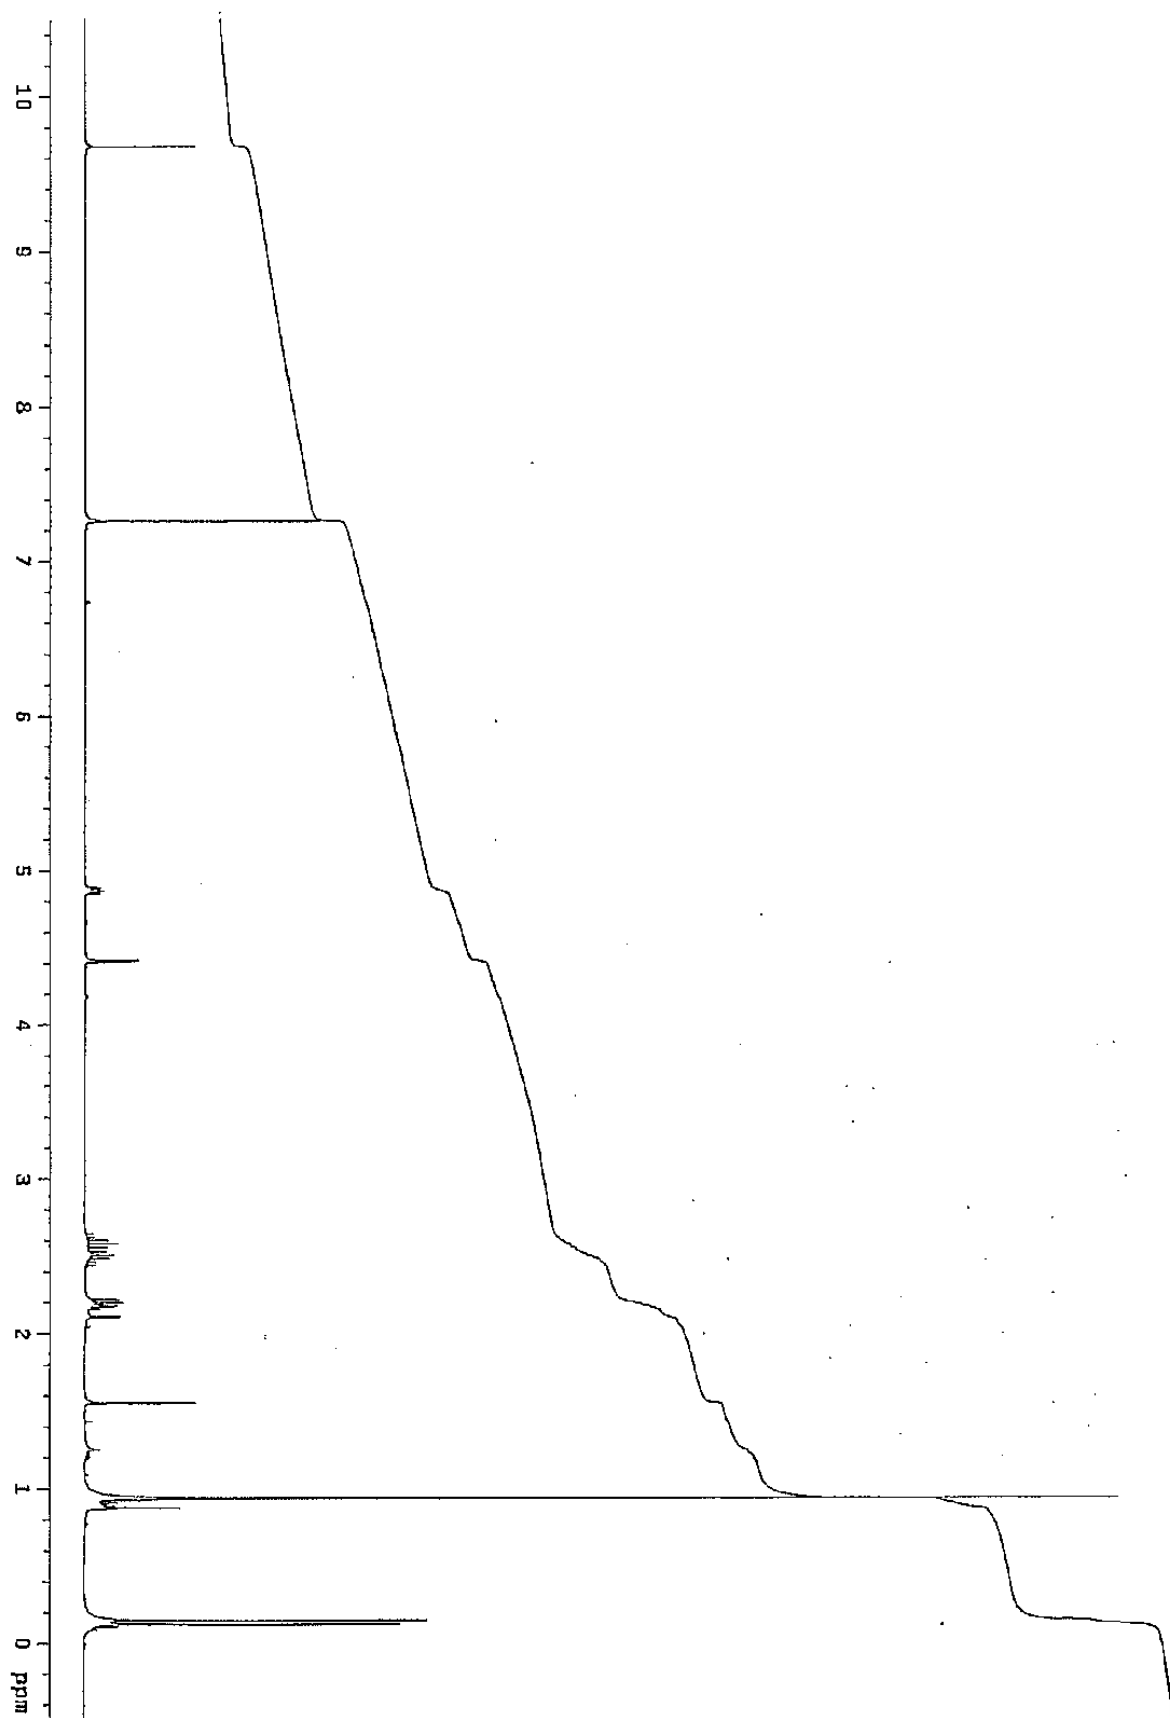

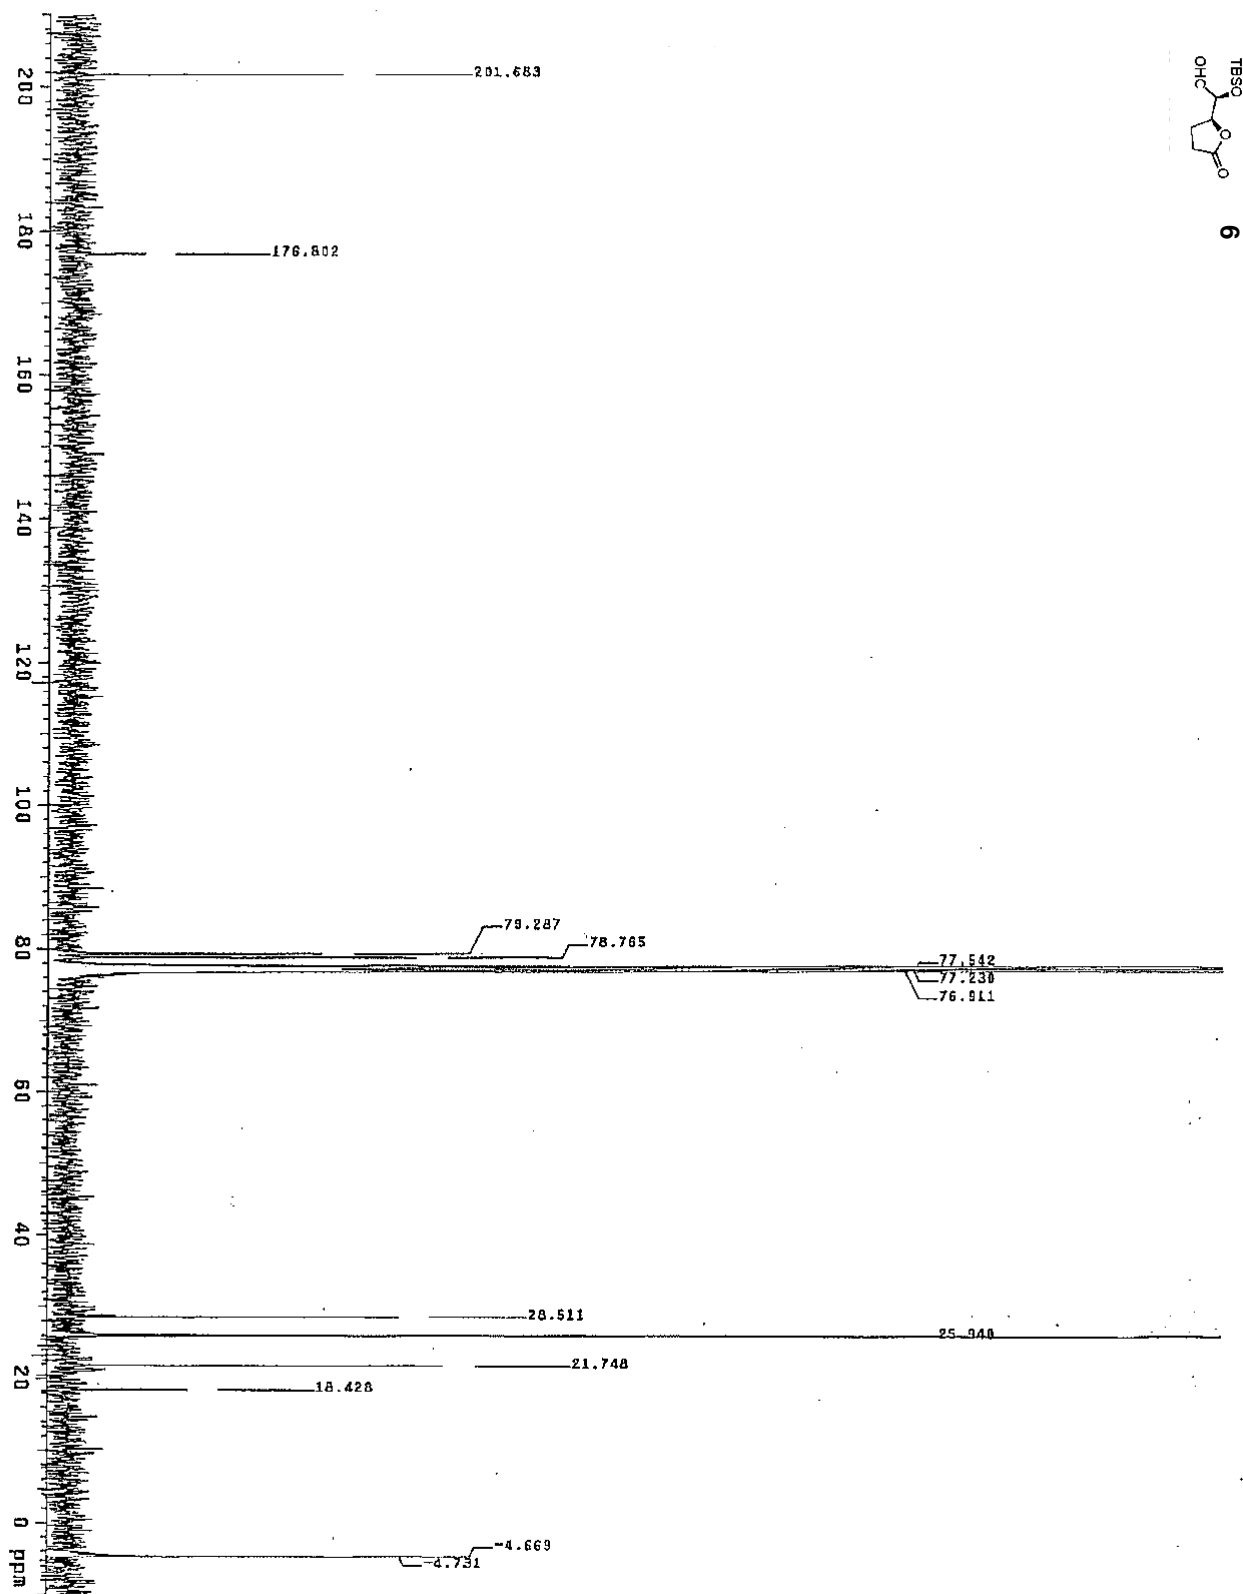

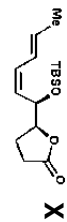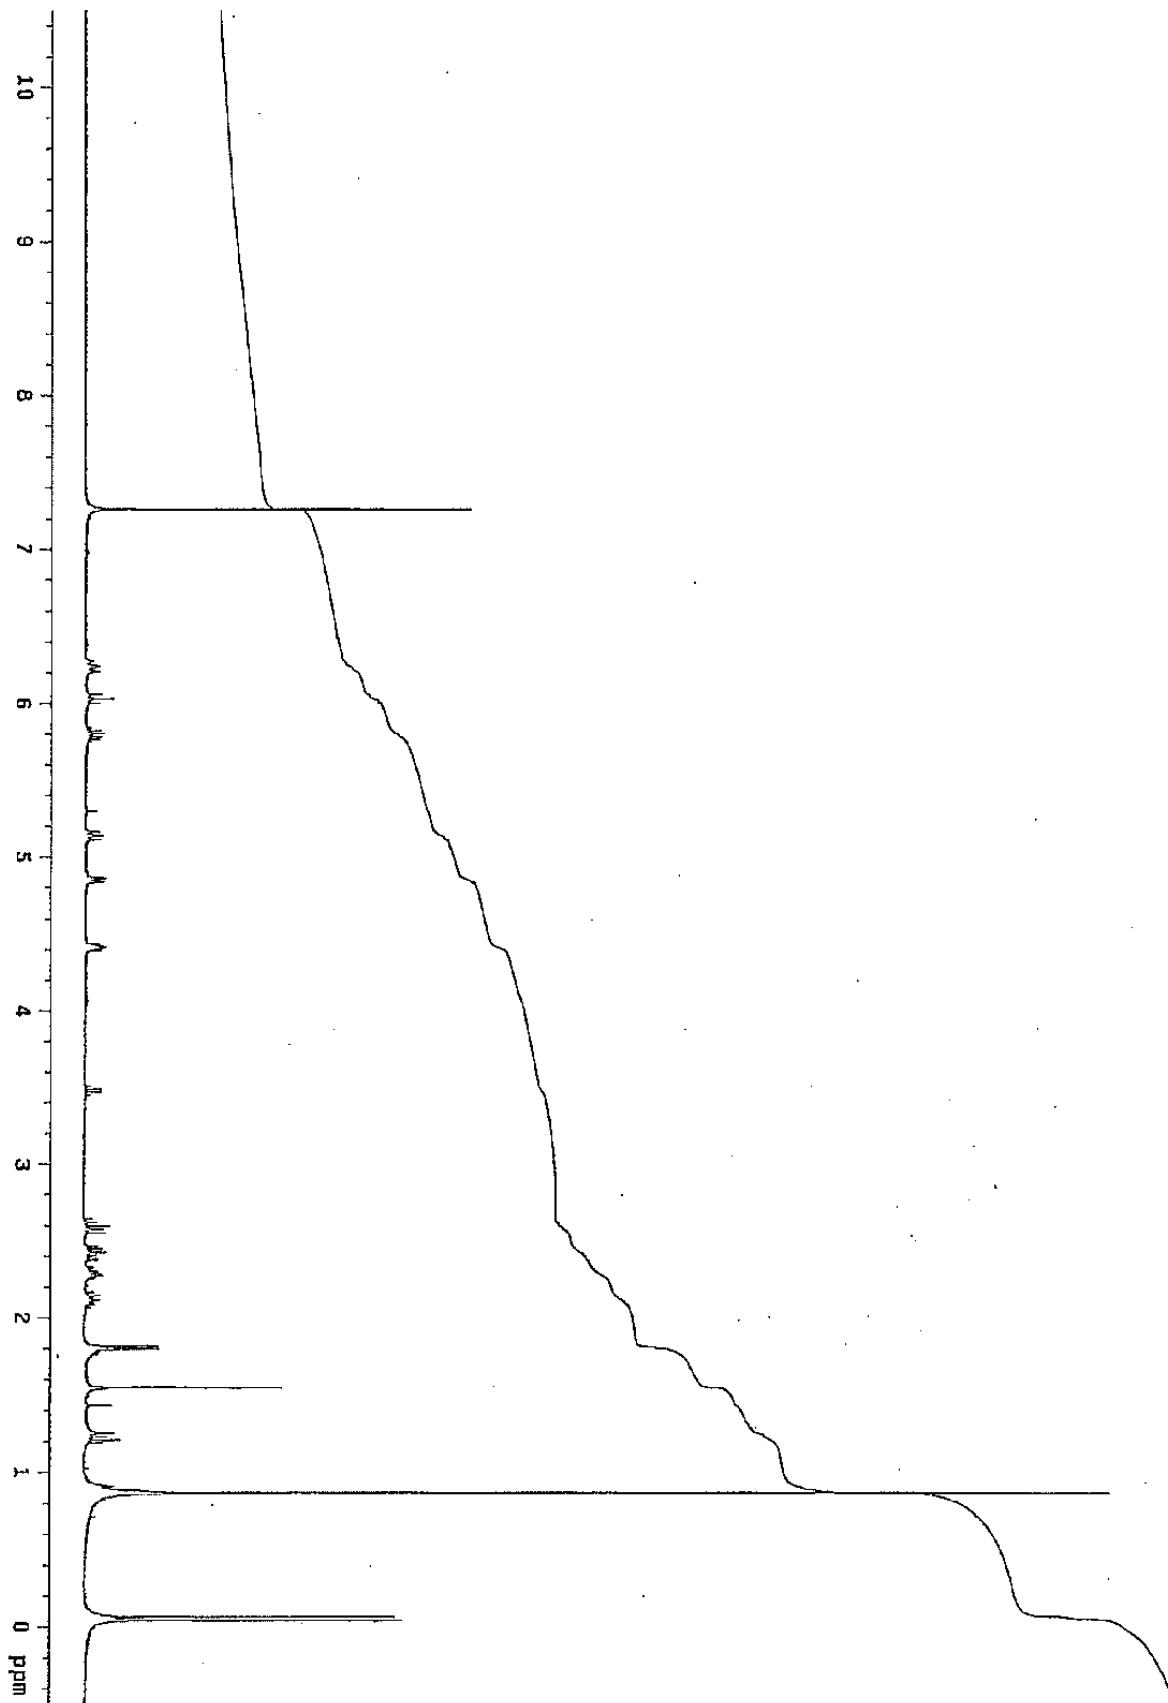



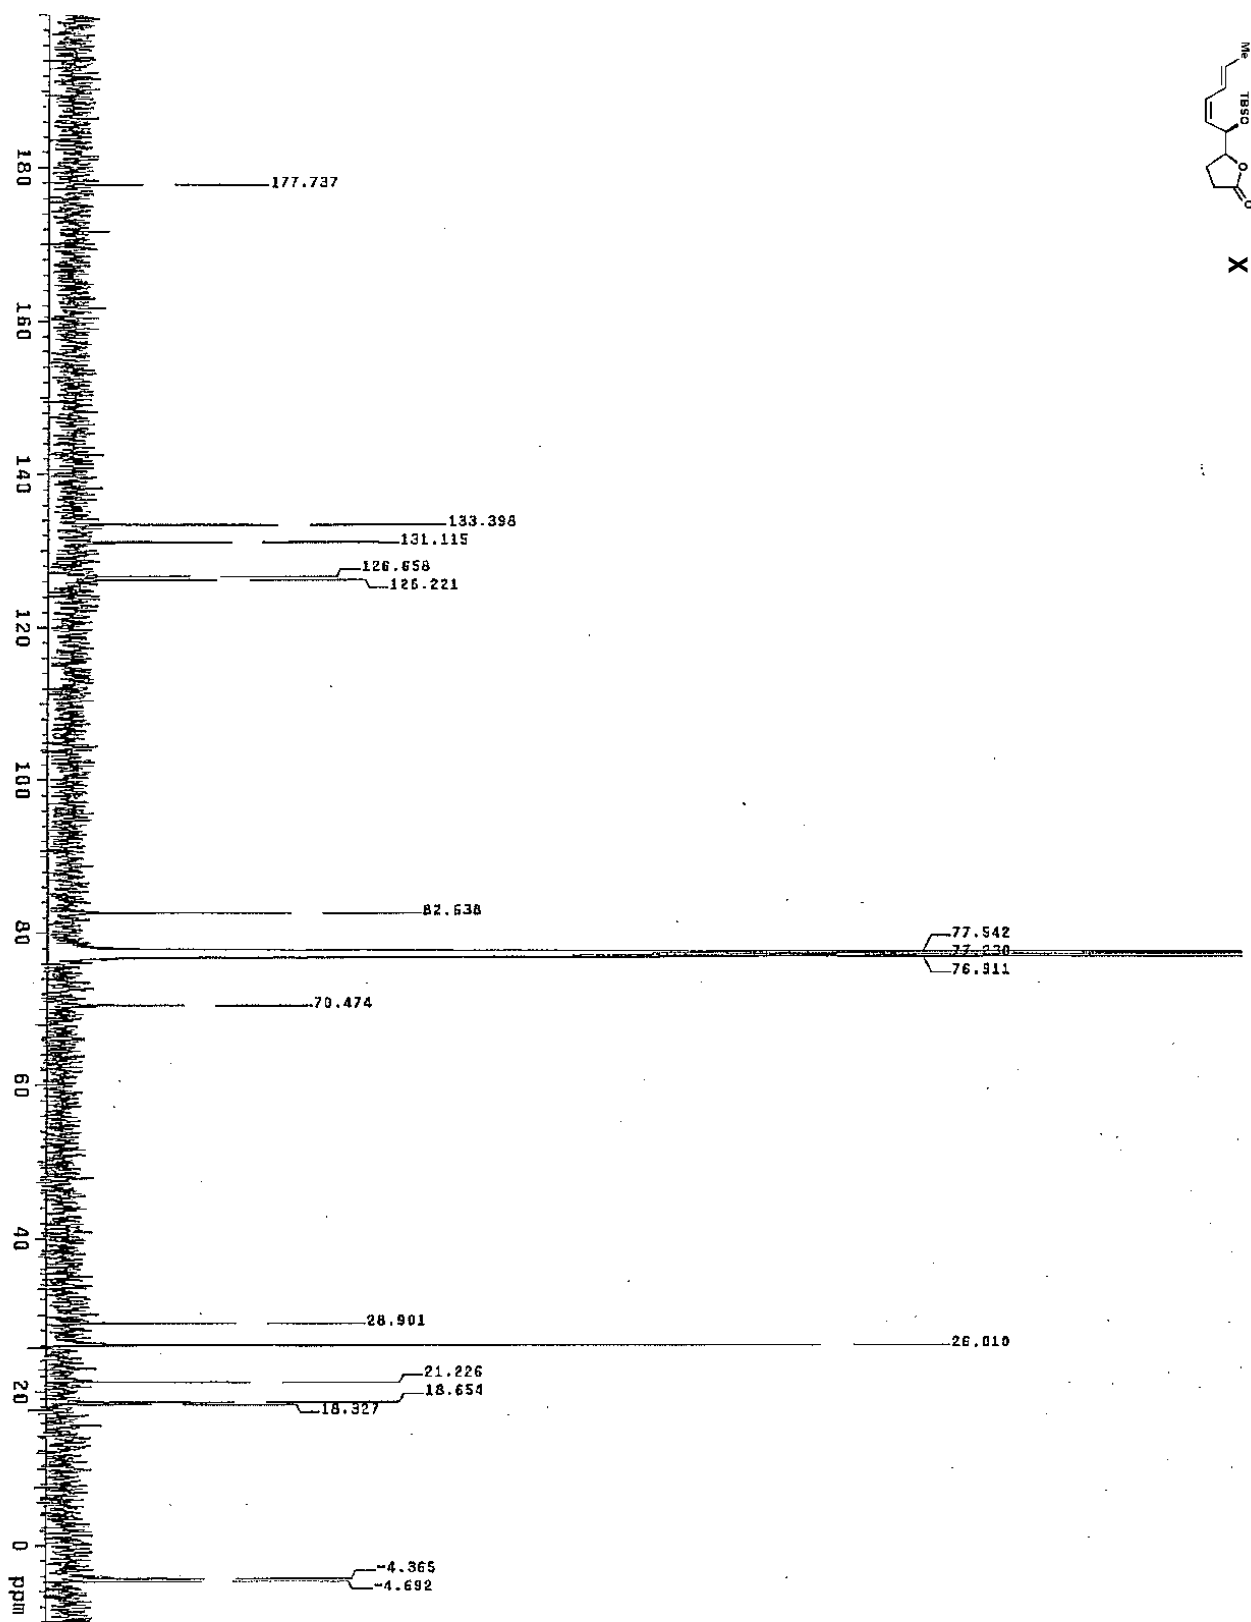

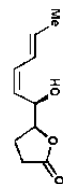

Sapinofuranone A

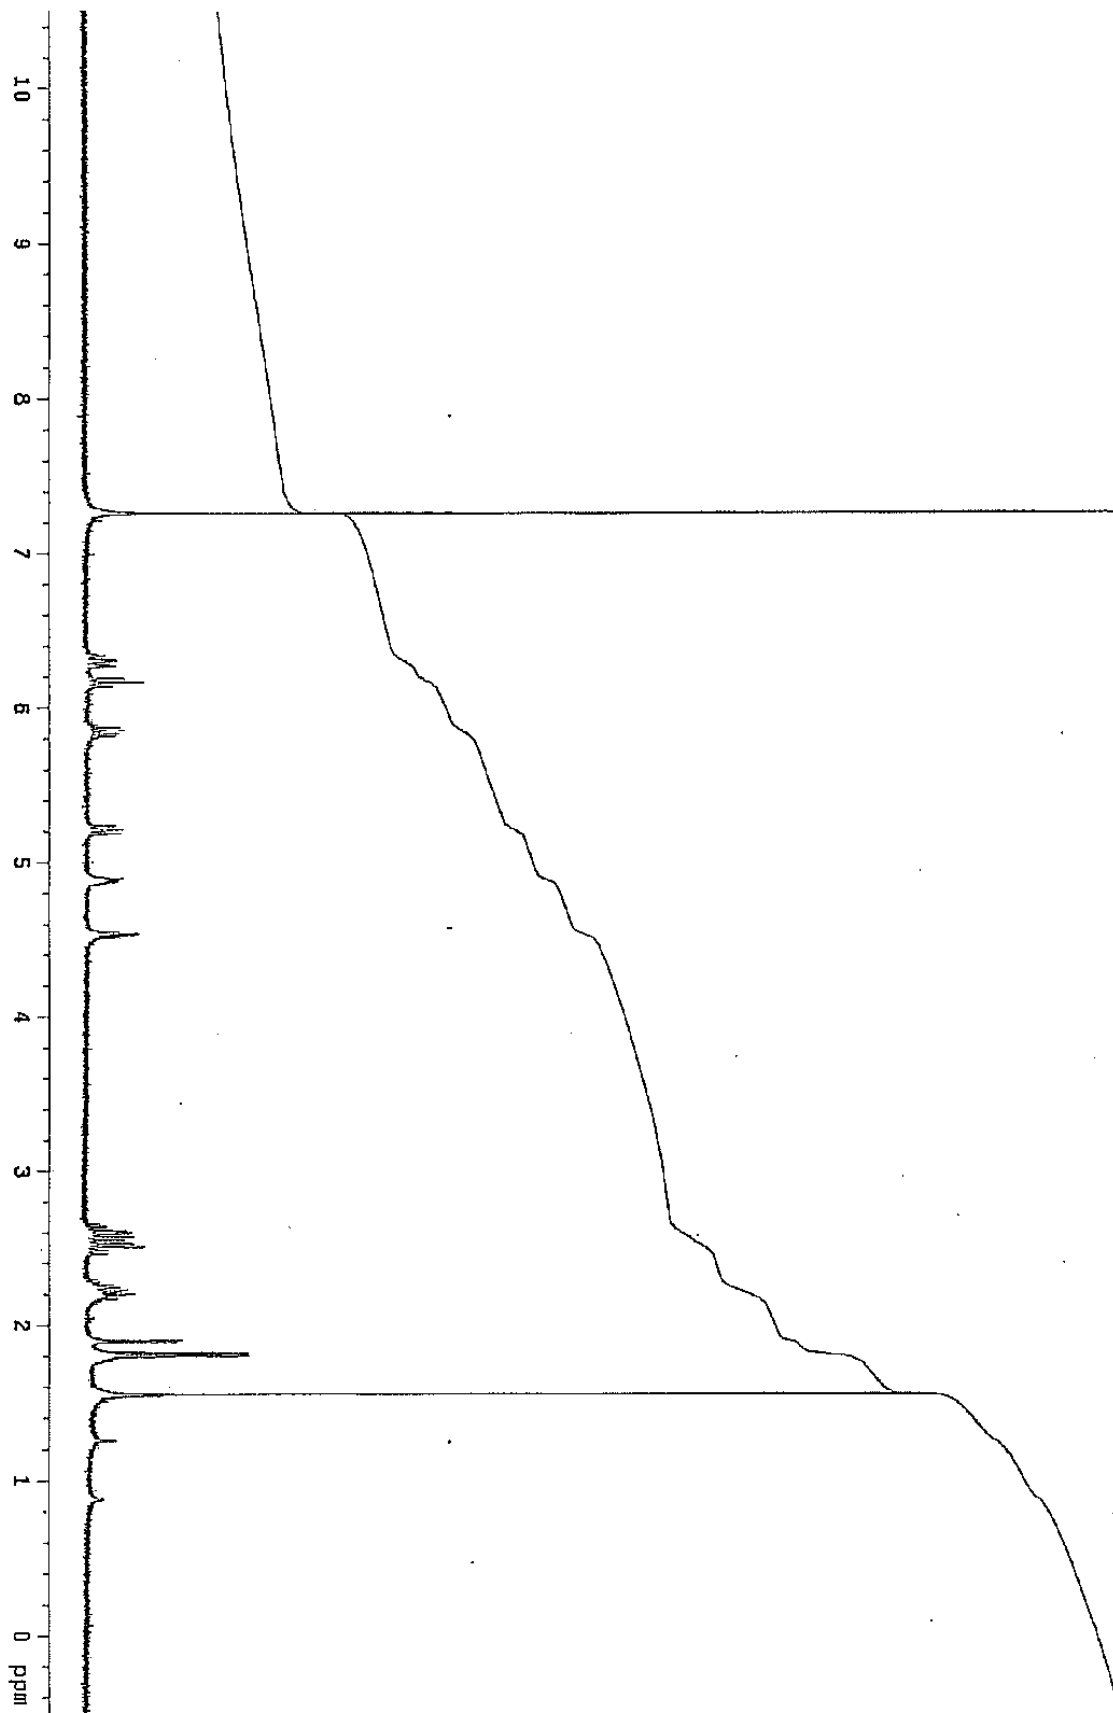

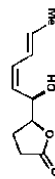

Sapinofuranone A

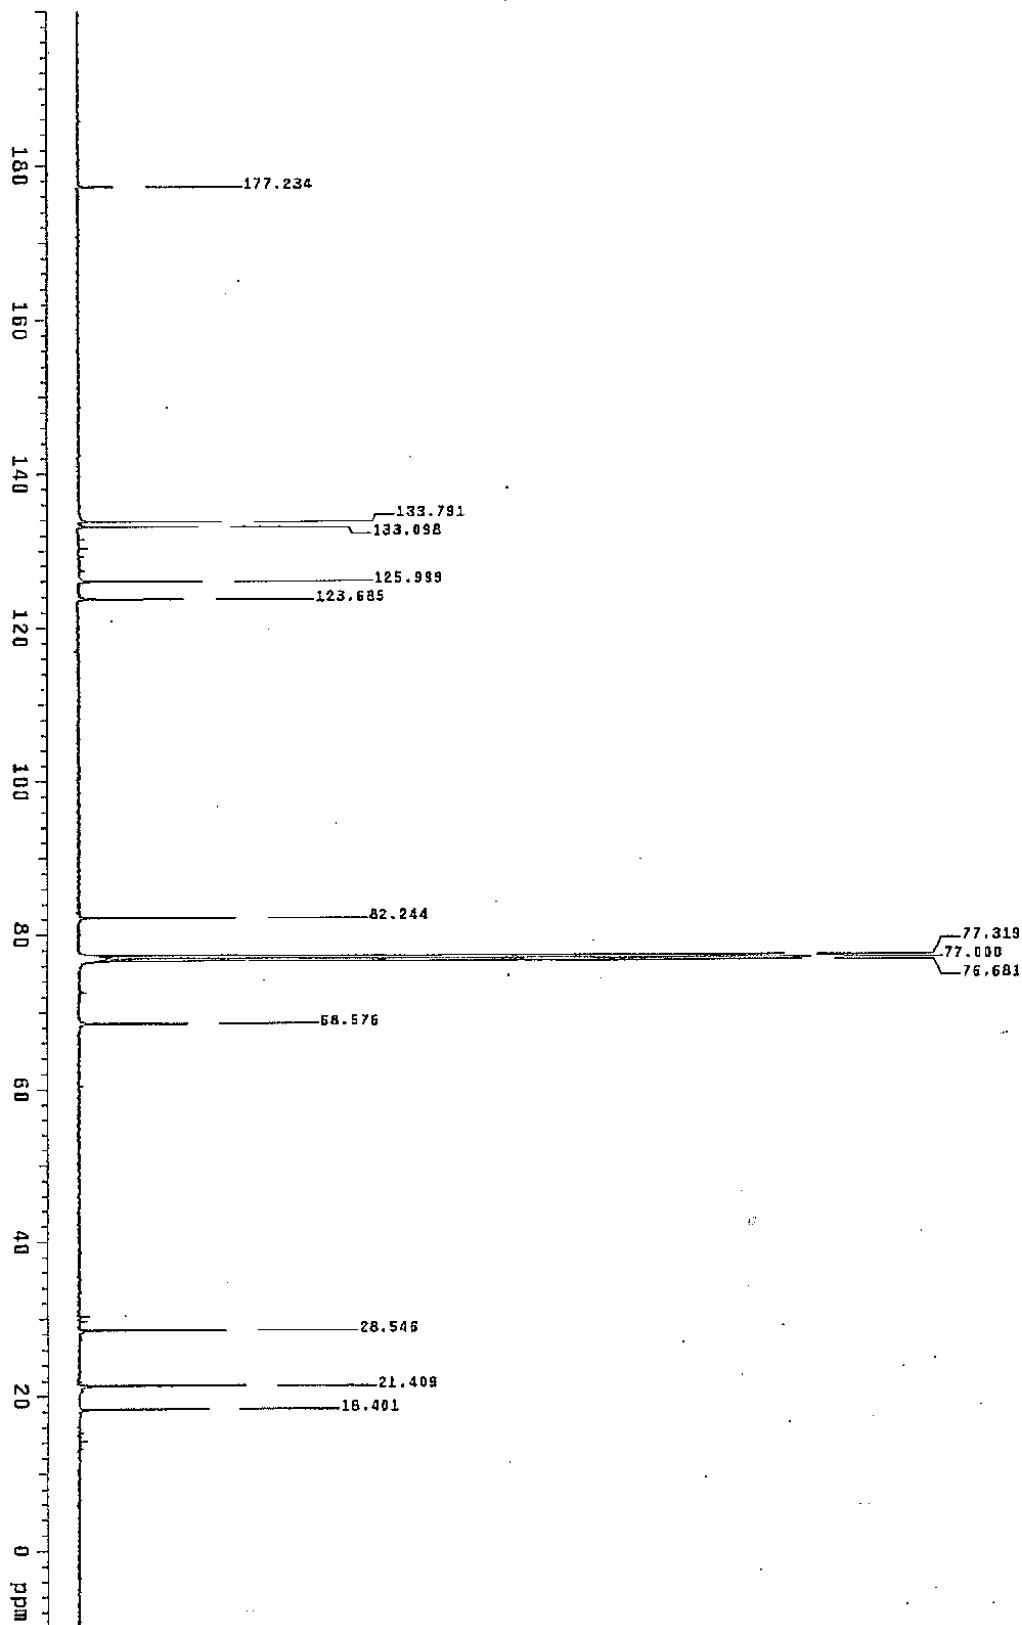

Supplement: NIHMS307923-supplement-1_si_001.pdf [file NIHMS307923-supplement-1_si_001.pdf]
